# Supplementary material for: Descriptive comparison of admission characteristics between pandemic waves and multivariable analysis of the association of the Alpha variant (B.1.1.7 lineage) of SARS-CoV-2 with disease severity in inner London
Source: PubMed Central journal article supplement (PMC8829842; doi:10.1136/bmjopen-2021-055474), 2022-02-08
Supplement: bmjopen-2021-055474.draft_revisions.pdf [file bmjopen-2021-055474.draft_revisions.pdf]

# BMJ Open

BMJ Open is committed to open peer review. As part of this commitment we make the peer review history of every article we publish publicly available.

When an article is published we post the peer reviewers' comments and the authors' responses online. We also post the versions of the paper that were used during peer review. These are the versions that the peer review comments apply to.

The versions of the paper that follow are the versions that were submitted during the peer review process. They are not the versions of record or the final published versions. They should not be cited or distributed as the published version of this manuscript.

BMJ Open is an open access journal and the full, final, typeset and author-corrected version of record of the manuscript is available on our site with no access controls, subscription charges or pay-per-view fees (<http://bmjopen.bmj.com>).

If you have any questions on BMJ Open's open peer review process please email [info.bmjopen@bmj.com](mailto:info.bmjopen@bmj.com)

# BMJ Open

## First and second SARS-CoV-2 waves in inner London: A comparison of admission characteristics and the association of the Alpha variant with disease severity.

|                               |                                                                                                                                                                                                                                                                                                                                                                                                                                                                                                                                                                                                                                                           |
|-------------------------------|-----------------------------------------------------------------------------------------------------------------------------------------------------------------------------------------------------------------------------------------------------------------------------------------------------------------------------------------------------------------------------------------------------------------------------------------------------------------------------------------------------------------------------------------------------------------------------------------------------------------------------------------------------------|
| Journal:                      | <i>BMJ Open</i>                                                                                                                                                                                                                                                                                                                                                                                                                                                                                                                                                                                                                                           |
| Manuscript ID                 | bmjopen-2021-055474                                                                                                                                                                                                                                                                                                                                                                                                                                                                                                                                                                                                                                       |
| Article Type:                 | Original research                                                                                                                                                                                                                                                                                                                                                                                                                                                                                                                                                                                                                                         |
| Date Submitted by the Author: | 13-Jul-2021                                                                                                                                                                                                                                                                                                                                                                                                                                                                                                                                                                                                                                               |
| Complete List of Authors:     | Snell, Luke; King's College London; Guy's and St Thomas' NHS Foundation Trust<br>Wang , Wenjuan; King's College London<br>Medina, Adela; Viapath; King's College London<br>Charalampous, Themoula; King's College London<br>Nebbia, Gaia; King's College London; Guy's and St Thomas' NHS Foundation Trust<br>Batra, Rahul; King's College London<br>de Jongh, Leonardo; Guy's and St Thomas' NHS Foundation Trust<br>Higgins, Finola; Guy's and St Thomas' NHS Foundation Trust<br>Wang, Yanzhong; King's College London<br>Edgeworth, Jonathan; King's College London; Guy's and St Thomas' NHS Foundation Trust<br>Curcin, Vasa; King's College London |
| Keywords:                     | VIROLOGY, EPIDEMIOLOGY, Epidemiology < INFECTIOUS DISEASES, Public health < INFECTIOUS DISEASES                                                                                                                                                                                                                                                                                                                                                                                                                                                                                                                                                           |
|                               |                                                                                                                                                                                                                                                                                                                                                                                                                                                                                                                                                                                                                                                           |

SCHOLARONE™  
Manuscripts

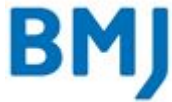

I, the Submitting Author has the right to grant and does grant on behalf of all authors of the Work (as defined in the below author licence), an exclusive licence and/or a non-exclusive licence for contributions from authors who are: i) UK Crown employees; ii) where BMJ has agreed a CC-BY licence shall apply, and/or iii) in accordance with the terms applicable for US Federal Government officers or employees acting as part of their official duties; on a worldwide, perpetual, irrevocable, royalty-free basis to BMJ Publishing Group Ltd ("BMJ") its licensees and where the relevant Journal is co-owned by BMJ to the co-owners of the Journal, to publish the Work in this journal and any other BMJ products and to exploit all rights, as set out in our [licence](#).

The Submitting Author accepts and understands that any supply made under these terms is made by BMJ to the Submitting Author unless you are acting as an employee on behalf of your employer or a postgraduate student of an affiliated institution which is paying any applicable article publishing charge ("APC") for Open Access articles. Where the Submitting Author wishes to make the Work available on an Open Access basis (and intends to pay the relevant APC), the terms of reuse of such Open Access shall be governed by a Creative Commons licence – details of these licences and which [Creative Commons](#) licence will apply to this Work are set out in our licence referred to above.

Other than as permitted in any relevant BMJ Author's Self Archiving Policies, I confirm this Work has not been accepted for publication elsewhere, is not being considered for publication elsewhere and does not duplicate material already published. I confirm all authors consent to publication of this Work and authorise the granting of this licence.

# First and second SARS-CoV-2 waves in inner London: A comparison of admission characteristics and the association of the Alpha variant with disease severity.

Luke B. Snell MBBS\*, Wenjuan Wang PhD\*, Adela Alcolea-Medina MPhil, Themoula Charalampous PhD, Gaia Nebbia PhD, Rahul Batra MD, Leonardo de Jongh, Finola Higgins, Yanzhong Wang PhD, Jonathan D. Edgeworth PhD#, Vasa Curcin PhD#

1 King's College London, London, UK (L.B. Snell, W. Wang, A. Alcolea-Medina, T. Charalampous, G. Nebbia, R. Batra, Y. Wang, J.D. Edgeworth, V Curin)

2 Guy's and St Thomas' NHS Foundation Trust, London, UK (L.B. Snell, G. Nebbia, R. Batra, L. de Jongh, F. Higgins, J.D. Edgeworth)

3 Viapath, St Thomas' Hospital, London, UK (A. Alcolea-Medina)

\* These first authors contributed equally

# These authors were co-principal investigators

Corresponding author: Dr. Luke B Snell, St. Thomas' Hospital, Westminster Bridge Road, UK SE1 7EH, [luke.snell@nhs.net](mailto:luke.snell@nhs.net), 02071887188

**Running title:** Comparison of SARS-CoV-2 waves and alpha variant severity

**Article word count:** 3714

## Abstract

**Background.** Current literature is unclear on whether the Alpha variant is associated with increased severity. We linked clinical data with viral genome sequence data to compare admitted cases between SARS-CoV-2 waves in London, and to investigate the association between Alpha variant and the severity of disease.

**Methods.** Clinical, demographic, laboratory and viral sequence data from electronic health record (EHR) systems was collected for all cases with a positive SARS-CoV-2 RNA test between March 13th 2020 and February 17th 2021 in a multi-site London healthcare institution. Univariate and multivariate analysis using logistic regression assessed risk factors for severity at admission as defined by hypoxia.

**Results** There were 5810 SARS-CoV-2 RNA positive cases. 2341 cases which were admitted, with 838 in wave one and 1503 in wave two. Both waves had a temporally aligned rise in nosocomial cases (n=96 in wave one, n=137 in wave two). The Alpha variant was first identified on 15th November 2020 and increased rapidly to comprise 400/472 (85%) of sequenced isolates from admitted cases in wave two. A multivariate analysis identified risk factors for severity on admission, such as age (OR 1.02 [CI 1.01-1.03] for every year older,  $p<0.001$ ), obesity (OR 1.7 [CI 1.28-2.26],  $p<0.001$ ) and infection with the Alpha variant (OR 1.68 [CI 1.26-2.24],  $p<0.001$ ).

**Conclusions** Our analysis is the first in hospitalised cohorts to show increased severity of disease associated with the Alpha variant. The number of nosocomial cases was similar in both waves despite the introduction of many infection control interventions before wave two.

Abstract word count: 250

## Strengths and limitations of this study

- Published evidence on whether the alpha variant of SARS-CoV-2 has a higher case fatality is mixed.
- Our study benefits from a long study window, including patients since the beginning of the SARS-CoV-2 pandemic
- We combine patient-level data with routinely performed genomic data, capturing a large proportion of inpatients with confirmed SARS-CoV-2 infection.
- Our analysis adjusts for co-morbidities, a feature missing from many of the population-level studies currently published.

## Ethics

1  
2 Ethical approval for data informatics was granted by The London Bromley Research Ethics  
3  
4 Committee (reference (20/HRA/1871)) to the King's Health Partners Data Analytics and Modelling  
5  
6 COVID-19 Group to collect clinically relevant data points from patient's electronic health records.  
7  
8  
9

10  
11 Whole genome sequencing of residual viral isolates was conducted under the COVID-19 Genomics  
12  
13 UK (COG-UK) consortium study protocol, which was approved by the Public Health England  
14  
15 Research Ethics and Governance Group (reference: R&D NR0195).  
16  
17  
18

## Acknowledgements

19  
20  
21  
22 The authors acknowledge use of the research computing facility at King's College London, Rosalind  
23  
24 (<https://rosalind.kcl.ac.uk>), which is delivered in partnership with the National Institute for Health  
25  
26 Research (NIHR) Biomedical Research Centres at South London & Maudsley and Guy's & St.  
27  
28 Thomas' NHS Foundation Trusts, and part-funded by capital equipment grants from the Maudsley  
29  
30 Charity (award 980) and Guy's & St. Thomas' Charity (TR130505). The views expressed are those  
31  
32 of the author(s) and not necessarily those of the NHS, the NIHR, King's College London, or the  
33  
34 Department of Health and Social Care.  
35  
36  
37  
38  
39  
40

## Funding

41  
42  
43 FH, LBS, YW, and VC are supported by the National Institute for Health Research (NIHR) Biomedical  
44  
45 Research Centre programme of Infection and Immunity (RJ112/N027) based at Guy's and St  
46  
47 Thomas' National Health Service NHS) Foundation Trust and King's College London.  
48  
49  
50

51  
52 This work was also supported by The Health Foundation and the Guy's and St Thomas' Charity.  
53  
54  
55

56  
57 COG-UK is supported by funding from the Medical Research Council (MRC) part of UK Research &  
58  
59 Innovation (UKRI), the National Institute of Health Research (NIHR) and Genome Research Limited,  
60  
operating as the Wellcome Sanger Institute.

1  
2 **Data sharing**  
3

4 Genomic data is publicly available on GISAID, please contact the authors for accession numbers.  
5

6 Our ethical approval precludes public sharing of patient-level data.  
7  
8  
9

10  
11 **Patient and public involvement**  
12

13 As this study was conducted to meet an urgent public health need patient and public involvement  
14 was not sought  
15  
16  
17

18  
19  
20 **Competing interests**  
21

22 None to declare.  
23  
24  
25  
26  
27  
28  
29  
30  
31  
32  
33  
34  
35  
36  
37  
38  
39  
40  
41  
42  
43  
44  
45  
46  
47  
48  
49  
50  
51  
52  
53  
54  
55  
56  
57  
58  
59  
60



## Background

SARS-CoV-2 infection has led to the death of over 1 million individuals worldwide since its emergence in China during December 2019, with over 120,000 deaths reported in the UK. In London, the estimated incidence in the first wave peaked around March 23rd at 2.2% [1] and then rapidly declined following non-pharmacological interventions. Hospital admissions peaked about 1 week later [2] reflecting the median period of symptoms before hospital presentation. A “second wave” of infections started in London around the beginning of October [3].

Genome sequencing identified the Alpha variant (the B.1.1.7 lineage) around the South East of England, which spread rapidly as part of the emerging second wave. [4] This occurred prior to widespread vaccination, with only 25% of the adult population receiving the first dose by mid-February 2021 [5]. The Alpha variant has been associated with increased transmissibility in community studies [6] [7], and community studies associate the variant with increased mortality [8] [9]. However, the single published study in hospitalised patients suggested no increase in need for ventilation or mortality [10].

Changes in transmissibility and severity have the potential to affect the burden on healthcare systems, and modify the characteristics of cases presenting to hospitals including the demographics, co-morbidities and severity of disease associated with SARS-CoV-2 infection.

## Objectives

We linked clinical datasets with local SARS-CoV-2 variant analysis to compare admission characteristics of hospitalised cases during the two waves of infection and to look at the association of the alpha variant with the severity of disease at presentation to hospital.

## Methods

### Setting

Guy's and St Thomas' NHS Foundation Trust (GSTT) is a multi-site healthcare institution providing general and emergency services predominantly to the South London boroughs of Lambeth and Southwark. An acute-admitting site (St Thomas' Hospital) has an adult emergency department, with a large critical care service including one of the UK's eight nationally commissioned ECMO centres for severe respiratory failure. A second site (Guy's Hospital) provides more inpatient services such as elective surgery, cancer care and other specialist services. A paediatric hospital (Evelina London) acts as a general and specialised referral centre. Several satellite sites for specialist services like dialysis, rehabilitation and long term care are also part of the institution. GSTT receives patients from regional hospitals predominantly to critical care through 'mutual aid' schemes.

### SARS-CoV-2 laboratory testing

Our laboratory began testing on 13<sup>th</sup> March 2020 with initial capacity for around 150 PCR tests per day, before increasing to around 500 tests per day in late April during wave one, and up to 1000 tests per day during wave two (Supplementary Figure 1).

Testing commenced during the first wave on 13<sup>th</sup> March 2020 limited to cases requiring admission or inpatients who had symptoms of fever or cough, as per national recommendation; guidance suggested cases who did not require admission should not be tested. For wave two, all cases admitted to hospital were screened and underwent universal interval screening at varying time points. Staff testing for symptomatic healthcare workers was also introduced towards the end of wave one. Comparative analysis was therefore restricted to SARS-CoV-2 RNA positive cases requiring admission. Cases without laboratory confirmation of SARS-CoV-2 infection were not included.

Assays used for the detection of SARS-CoV-2 RNA include PCR testing using Aus Diagnostics or by the Hologic Aptima SARS-CoV-2 Assay. Nucleic acid was first extracted using the QIAGEN

QIASymphony SP system and a QIASymphony DSP Virus/Pathogen Mini Kit (catalogue No: 937036) with the off-board lysis protocol.

## Definitions and participants

Cases were identified by the first positive SARS-CoV-2 RNA test. Cases were placed in mutually exclusive categories with the following definitions: 1) outpatients 2) testing through occupational health 3) emergency department attenders not subsequently admitted within 14 days 4) patients admitted within 14 days of a positive test 5) nosocomial cases, defined based on ECDC definitions, as those having a first positive test on day 8 or later after admission to hospital where COVID-19 was not suspected on admission [11] and 6) interhospital transfers. For the purpose of comparison only the inpatient group, admitted within 14 days following a positive test, were taken forward for onward comparison. A composite datapoint for 'hypoxia' was created, equivalent to WHO ordinal scale of  $\geq 4$ , with cases taken to be hypoxic if on admission they had oxygen saturations of  $< 94\%$ , if they were recorded as requiring supplemental oxygen, or if the fraction of inspired oxygen was recorded as being greater than 0.21.

## Determination of SARS-CoV-2 lineage

Whole genome sequencing of residual samples from SARS-CoV-2 cases was performed using GridION (Oxford Nanopore Technology), using version 3 of the ARTIC protocol [12] and bioinformatics pipeline [13]. Samples were selected for sequencing if the corrected CT value was 33 or below, or the Hologic Aptima assay was above 1000 RLU. During the first wave sequencing occurred between March 1st - 31st, whilst sequencing in the second wave restarted in November 2020 - March 2021. Variants were called using updated versions of pangolin 2.0 [14].

## Data sources, extraction and integration

Clinical, laboratory and demographic data for all cases with a laboratory reported SARS-CoV-2 PCR RNA test on nose and throat swabs or lower respiratory tract specimens were extracted from hospital

1  
2  
3  
4  
5  
6  
7  
8  
9  
10  
11  
12  
13  
14  
15  
16  
17  
18  
19  
20  
21  
22  
23  
24  
25  
26  
27  
28  
29  
30  
31  
32  
33  
34  
35  
36  
37  
38  
39  
40  
41  
42  
43  
44  
45  
46  
47  
48  
49  
50  
51  
52  
53  
54  
55  
56  
57  
58  
59  
60

electronic health record (EHR) data sources using records closest to the test date. Data was linked to the Index of Multiple Deprivation (IMD). Age, sex and ethnicity were extracted from EPR. Self-reported ONS ethnic categories were stratified into White (British, Irish, Gypsy and White-Other) or non-White (Black [African, Caribbean, and Black-Other], Asian [Bangladeshi, Chinese, Indian, Pakistan, and Asian-Other] and Mixed/Other). Numbers for which data was missing is listed by each variable. Comorbidities and medication history were extracted from the EPR and e-Noting using natural language processing (NLP). If a comorbidity was not recorded it was assumed not to be present. Cases were characterised as having/not having a past medical history of hypertension, cardiovascular disease (stroke, transient ischaemic attack, atrial fibrillation, congestive heart failure, ischaemic heart disease, peripheral artery disease or atherosclerotic disease), diabetes mellitus, chronic kidney disease, chronic respiratory disease (chronic obstructive pulmonary disease, asthma, bronchiectasis or pulmonary fibrosis) and neoplastic disease (solid tumours, haematological neoplasias or metastatic disease). Obesity was defined as either obesity present in the notes, or recorded Body Mass Index (BMI)  $\geq 30$  kg/m<sup>2</sup>. Medicines data were extracted using both structured queries and natural language processing tools with medical and drug dictionaries. Additionally, checks on free text data were performed by a cardiovascular clinician to ensure the information was accurate.

Analysis was carried out on the secure Rosalind high-performance computer infrastructure [15] running Jupyter Notebook 6.0.3, R 3.6.3 and Python 3.7.6.

### Statistical analysis and outcome measures

General statistics were summarised with mean and standard deviation (SD) for continuous variables if the distribution is normal and median and interquartile range (IQR) if the distribution is non-normal. Count and percentages were used for categorical variables. For the comparisons of variables for wave one versus two variables, Alpha variant versus non-Alpha variants, as well as sequenced patients versus non-sequenced patients in wave two, Kruskal-Wallis test was used for continuous variables and Chi-squared test for categorical variables with significance level of  $p=0.05$ . Multivariate analysis was performed using logistic regression to assess the odds ratios of different risk factors

(including age, sex, ethnicity (White, non-White, Unknown), variant status (Alpha or non-Alpha), and cardiovascular disease, hypertension, diabetes, chronic respiratory disease, cancer, kidney disease, HIV, transplant, and frailty) for hypoxia on admission as the binary outcome indicating severity at admission.

For peer review only

## Results

### General epidemiology and results of viral sequencing.

Figure 1 shows the incidence of SARS-CoV-2 cases, SARS-CoV-2 admissions, and nosocomial cases since March 13th 2020. In total 5810 individuals had a positive SARS-CoV-2 PCR test up until the data extraction date of 17th February 2021. Two “waves” are evident with July 25th taken as an arbitrary separation date between waves, at which point a minimum of 12 wave one cases remained in hospital. Wave one comprised 1528 unique cases (26.3%) from when laboratory testing commenced on March 13th to peak rapidly between the 1st and 8th April 2020 with 57 new cases, before falling to a baseline by May 12th 2020. 1391/1528 (91%) of all cases in wave one occurred during these 60 days. Wave two comprised 4282 unique cases (73.7%), with incidence first increasing gradually from the beginning of October. There was then a period of rapidly escalating incidence from about 10th December, peaking on 28th December 2020 139 cases were diagnosed. 3446/4282 (80%) of wave two cases detected during a comparable 60 day period ending 8th February 2021. In both waves nosocomial cases peaked early, increasing along with admissions but then fell while the number of community admissions continued at peak levels.

**Figure 1:** Distribution of laboratory confirmed SARS-CoV-2 cases over time. Daily incidence of new cases (beige), newly admitted cases (orange) and nosocomial acquisitions (green) over time.

Individuals with a positive test were placed into six categories (Figure 2), The 5810 SARS-CoV-2 cases were categorised as follows, (n=2341), healthcare workers (n=1549), outpatients (n=874), emergency department (ED) attenders not subsequently admitted (n=532), inter-hospital transfers (n=281) and nosocomial cases (n=233). Some observed differences between wave one and two reflected the increased availability of testing particularly for outpatients (208;13.6% v 666;15.6%), people sent home from ED (111;7.3% v 421; 9.8%) and healthcare workers (171;11.2% v 1378;32.2%). There were also more interhospital transfers of known COVID-19 cases in wave two (177;4.1% v 104;6.8% in wave one). In wave two, the number of admissions increased (1503; 35.1% v 838; 54.8%) along with nosocomial cases (137;3.2% v 96;6.3%) compared with wave one.

1  
2 **Figure 2 (A)** Absolute number of cases within the different hospital cohorts during wave one  
3  
4 (upper) and wave two (lower). **(B)** Proportion of cases within the different hospital cohorts during  
5  
6 wave one (upper) and wave two (lower).  
7  
8  
9

10  
11 Figure 3 shows the 1470 successfully sequenced SARS-CoV-2 isolates over time, with 382 from  
12  
13 wave one and 1088 from wave two. Sequencing was successful for 216/838 (26%) admitted cases  
14  
15 from wave one, 472/1503 (31%) admitted cases in wave two, and 121/233 (52%) nosocomial cases.  
16  
17 The proportion of Alpha variant increased rapidly after the first Alpha isolate was identified on 15th  
18  
19 November 2020, accounting for approximately two thirds within 3 weeks, and almost 100% (600/617  
20  
21 isolates, 97%) in January 2021. In the second wave, the Alpha variant made up 83% (908/1088) of  
22  
23 all sequenced isolates, 85% (400/472) of sequenced isolates from admitted cases, and 88% (51/59)  
24  
25 of sequenced isolates from nosocomial cases. In addition, two cases of the B.1.351 beta variant of  
26  
27 concern were also detected in the wave two admission cohort.  
28  
29  
30  
31  
32  
33

34 **Figure 3** Number of cases with sequenced SARS-CoV-2 isolates by epi-week (bar) and the  
35  
36 proportion of which were made up of the alpha variant B.1.1.7 (red line)  
37  
38  
39  
40

### 41 **Comparison of characteristics of admitted cases between wave one and two**

42  
43 General statistics of cases admitted during wave one (n=838) and wave two (n=1503) were  
44  
45 compared (Table 1). There was only a small difference in mean age (62yrs in wave one v 60yrs in  
46  
47 wave two, p=0.019), however admitted cases were more likely to be female in wave two (47.3% v  
48  
49 41.8%, p=0.011). . A larger proportion of admitted cases in wave two were obese (29.1% v 24.6%,  
50  
51 p=0.02). Comparison of comorbidities showed those in wave two were less likely to have a diagnosis  
52  
53 of frailty (11.5% v 22.8%, p<0.001), history of stroke (4.3% v 8.6%, p<0.001) or cancer (4.8% v 7.2%,  
54  
55 p=0.022) There was no significant difference in proportion with known comorbidities of diabetes,  
56  
57 kidney disease, hypertension, cardiovascular disease or respiratory disease.  
58  
59  
60

**Table 1, General statistics of the cohort for wave one and two admissions**

|                                 | Missing | Wave one admissions<br>n (%) / value [IQR] | Wave two admissions<br>n (%) / value [IQR] | P-Value |
|---------------------------------|---------|--------------------------------------------|--------------------------------------------|---------|
| n                               |         | 838                                        | 1503                                       |         |
| <b>Demographics</b>             |         |                                            |                                            |         |
| Age                             | 0       | 62.0 [49.0,78.0]                           | 60.0 [47.0,74.0]                           | 0.019   |
| Male                            | 0       | 488 (58.2)                                 | 792 (52.7)                                 | 0.011   |
| Ethnicity                       | 0       |                                            |                                            | 0.013   |
| White                           |         | 331 (39.5)                                 | 598 (39.8)                                 |         |
| Asian                           |         | 64 (7.6)                                   | 121 (8.1)                                  |         |
| Black-African                   |         | 177 (21.1)                                 | 262 (17.4)                                 |         |
| Black-Caribbean                 |         | 73 (8.7)                                   | 98 (6.5)                                   |         |
| Mixed                           |         | 15 (1.8)                                   | 18 (1.2)                                   |         |
| Other                           |         | 45 (5.4)                                   | 107 (7.1)                                  |         |
| Unknown                         |         | 133 (15.9)                                 | 299 (19.9)                                 |         |
| BMI                             | 577     | 27.0 [23.8,31.7]                           | 27.7 [24.0,32.9]                           | 0.022   |
| BMI>30                          |         | 206 (24.6)                                 | 438 (29.1)                                 | 0.02    |
| BMI>40                          |         | 34 (4.1)                                   | 86 (5.7)                                   | 0.098   |
| <b>Physiological parameters</b> |         |                                            |                                            |         |
| Heart Rate                      | 360     | 84.0 [75.0,94.0]                           | 81.0 [72.0,91.0]                           | <0.001  |
| Heart Rate>100                  |         | 105 (12.5)                                 | 142 (9.4)                                  | 0.02    |
| <b>Blood pressure</b>           |         |                                            |                                            |         |
| Systolic                        | 369     | 125.0 [113.0,139.0]                        | 127.0 [115.0,141.0]                        | 0.013   |
| Diastolic                       | 369     | 73.0 [65.0,80.0]                           | 75.0 [68.0,82.0]                           | <0.001  |
| MAP                             | 369     | 90.7 [82.2,99.0]                           | 92.3 [84.7,101.3]                          | <0.001  |
| Respiratory Rate                | 359     | 19.0 [18.0,22.0]                           | 19.0 [18.0,22.0]                           | 0.764   |
| Respiratory Rate>20             |         | 200 (23.9)                                 | 365 (24.3)                                 | 0.86    |
| Hypoxia                         | 658     | 370 (64.3)                                 | 726 (65.5)                                 | 0.67    |
| Temperature                     | 361     | 36.9 [36.4,37.5]                           | 36.6 [36.2,37.2]                           | <0.001  |
| NEWS2                           | 405     |                                            |                                            | 0.86    |
| 0                               |         | 95 (11.3)                                  | 173 (11.5)                                 |         |
| 1                               |         | 108 (12.9)                                 | 192 (12.8)                                 |         |
| 2                               |         | 117 (14.0)                                 | 188 (12.5)                                 |         |
| 2+                              |         | 371 (44.3)                                 | 692 (46.0)                                 |         |
| <b>Laboratory parameters</b>    |         |                                            |                                            |         |
| Neutrophils                     | 8       | 4.9 [3.4,7.6]                              | 5.0 [3.3,7.5]                              | 0.724   |
| Lymphocytes                     | 7       | 0.9 [0.6,1.3]                              | 0.9 [0.6,1.4]                              | 0.741   |
| NLR                             | 8       | 5.4 [3.1,9.9]                              | 5.4 [3.2,9.8]                              | 0.951   |
| Creatinine                      | 43      | 83.0 [64.0,115.0]                          | 86.0 [68.0,117.0]                          | 0.065   |



|                        |      |                      |                      |        |
|------------------------|------|----------------------|----------------------|--------|
| Urea                   | 855  | 7.0 [4.6,12.2]       | 6.0 [4.3,9.9]        | 0.001  |
| Estimated GFR          | 114  | 73.0 [48.0,98.0]     | 69.0 [48.0,89.0]     | 0.001  |
| Albumin                | 185  | 37.0 [32.0,40.0]     | 38.0 [34.0,41.0]     | <0.001 |
| CRP                    | 61   | 74.5 [26.0,148.0]    | 51.0 [18.0,103.8]    | <0.001 |
| DDimer                 | 1297 | 1.1 [0.6,3.0]        | 0.9 [0.5,2.2]        | 0.001  |
| Ferritin               | 905  | 855.0 [394.0,1533.5] | 699.0 [342.0,1359.0] | 0.05   |
| <b>Co-morbidities</b>  |      |                      |                      |        |
| Stroke                 | 0    | 72 (8.6)             | 64 (4.3)             | <0.001 |
| TIA                    | 0    | 9 (1.1)              | 20 (1.3)             | 0.731  |
| Hypertension           | 0    | 288 (34.4)           | 464 (30.9)           | 0.091  |
| Diabetes               | 0    | 246 (29.4)           | 384 (25.5)           | 0.052  |
| AF                     | 0    | 63 (7.5)             | 115 (7.7)            | 0.972  |
| IHD                    | 0    | 146 (17.4)           | 244 (16.2)           | 0.495  |
| Heart Failure          | 0    | 54 (6.4)             | 105 (7.0)            | 0.679  |
| COPD                   | 0    | 64 (7.6)             | 109 (7.3)            | 0.796  |
| Asthma                 | 0    | 74 (8.8)             | 138 (9.2)            | 0.835  |
| Cancer                 | 0    | 60 (7.2)             | 72 (4.8)             | 0.022  |
| Kidney disease         | 0    | 112 (13.4)           | 181 (12.0)           | 0.389  |
| HIV                    | 0    | 21 (2.5)             | 36 (2.4)             | 0.979  |
| Solid organ Transplant | 0    | 24 (2.9)             | 49 (3.3)             | 0.686  |
| Frailty                | 0    | 191 (22.8)           | 173 (11.5)           | <0.001 |

Note: p-value was from Kruskal-Wallis test for continuous variables and Chi-squared test for categorical variables.

Abbreviations: BMI: Body Mass Index, TIA: Transient Ischaemic Attack, IHD: Ischemic Heart Disease, COPD: Chronic Obstructive Pulmonary Disease, HIV: Human Immunodeficiency Virus, MAP: Mean Arterial Pressure, SPO2: Oxygen Saturation, GFR: Glomerular Filtration Rate, CRP: C-Reactive Protein, NLR: Neutrophils and Lymphocytes Ratio, NEWS2: National Early Warning Score 2.

1  
2  
3  
4  
5  
6  
7  
8  
9  
10  
11  
12  
13  
14  
15  
16  
17  
18  
19  
20  
21  
22  
23  
24  
25  
26  
27  
28  
29  
30  
31  
32  
33  
34  
35  
36  
37  
38  
39  
40  
41  
42  
43  
44  
45  
46  
47  
48  
49  
50  
51  
52  
53  
54  
55  
56  
57  
58  
59  
60

There were no significant differences between waves in the proportion with severe SARS-CoV-2 disease upon admission as judged by hypoxia (64.3% in wave one vs 65.5% in wave two,  $p=0.67$ ) or tachypnoea (respiratory rate $>20$ ) (23.9% vs 24.3%,  $p=0.86$ ). There were small differences in other physiological parameters on admission, some of which reached statistical significance but differences were not clinically relevant.

Laboratory markers were compared between waves (Table 1). There were small but significant differences, such as lower CRP (median 51.0 mg/dL (IQR: 18.0-103.8) v 74.5 mg/dL (IQR: 26.0-148.0),  $p<0.001$ ) and lower ferritin (699.0 [IQR: 342.0-1359.0] v 855.0 [IQR: 394.0-1533.5],  $p=0.05$ ) in wave two. There were other small statistically significant differences without clear clinical significance, such as a lower D-Dimer in wave two (0.9 mg/L FEU [IQR: 0.5-2.2] v 1.1 mg/L FEU [IQR:0.6-3.0],  $p=0.001$ ), and lower estimated GFR (69.0 ml/min [IQR: 48.0-89.0] v 73.0 ml/min [IQR: 48.0-98.0],  $p=0.001$ ), lower urea (6.0 mmol/L [IQR: 4.3-9.3] v 7.0 mmol/L [IQR: 4.6-12.2],  $p=0.001$ ) and higher albumin (38.0 g/L [IQR: 34.0-41.0 g/L] vs 37.0 g/L [IQR: 32.0-40.0],  $p<0.001$ ). There was no significant difference with neutrophils, lymphocytes, neutrophils and lymphocytes ratio (NLR), creatinine and glucose.

### **Comparison of characteristics of admitted cases infected with Alpha and non-Alpha variants**

Given the reported association between increased disease severity and transmission with the Alpha variant, we compared demographic, physiological and laboratory parameters between admitted cases with infection caused by Alpha variant ( $n=400$ ) compared with non-Alpha ( $n=910$ ) variants (Table 2). We considered all cases in wave one to be non-Alpha variants, as wave one took place prior to emergence of the Alpha variant and before Alpha variant was first identified in our population in November 2021.

**Table 2, General statistics of the cohort for non-Alpha variant and Alpha variant admissions**

|                                 | Missing | Non B.1.1.7 variant<br>n (%) / value [IQR] | B.1.1.7 variant<br>n (%) / value [IQR] | P-Value |
|---------------------------------|---------|--------------------------------------------|----------------------------------------|---------|
| n                               |         | 910                                        | 400                                    |         |
| <b>Demographics</b>             |         |                                            |                                        |         |
| Age                             | 0       | 62.0 [49.0,78.0]                           | 64.0 [52.0,78.0]                       | 0.22    |
| Male                            |         | 530 (58.2)                                 | 208 (52.0)                             | 0.042   |
| Ethnicity                       | 0       |                                            |                                        | 0.402   |
| White                           |         | 358 (39.3)                                 | 164 (41.0)                             |         |
| Asian                           |         | 71 (7.8)                                   | 38 (9.5)                               |         |
| Black-African                   |         | 191 (21.0)                                 | 67 (16.8)                              |         |
| Black-Caribbean                 |         | 78 (8.6)                                   | 27 (6.8)                               |         |
| Mixed                           |         | 16 (1.8)                                   | 6 (1.5)                                |         |
| Other                           |         | 50 (5.5)                                   | 23 (5.8)                               |         |
| Unknown                         |         | 146 (16.0)                                 | 75 (18.8)                              |         |
| BMI                             | 334     | 27.1 [23.8,31.7]                           | 28.1 [24.0,34.2]                       | 0.036   |
| BMI>30                          |         | 226 (24.8)                                 | 121 (30.2)                             | 0.048   |
| BMI>40                          |         | 36 (4.0)                                   | 26 (6.5)                               | 0.063   |
| <b>Physiological parameters</b> |         |                                            |                                        |         |
| Heart Rate                      | 198     | 84.0 [74.0,94.0]                           | 80.0 [72.0,90.0]                       | 0.001   |
| Heart Rate>100                  |         | 118 (13.0)                                 | 36 (9.0)                               | 0.05    |
| <b>Blood pressure</b>           |         |                                            |                                        |         |
| Systolic                        | 201     | 125.0 [113.0,139.5]                        | 127.0 [115.0,142.0]                    | 0.138   |
| Diastolic                       | 201     | 73.0 [65.0,80.0]                           | 75.0 [67.0,83.0]                       | 0.01    |
| MAP                             | 201     | 90.7 [82.3,99.2]                           | 92.7 [84.0,101.7]                      | 0.022   |
| Respiratory Rate                | 194     | 19.0 [18.0,21.0]                           | 19.0 [18.0,22.0]                       | 0.591   |
| Respiratory Rate>20             |         | 209 (23.0)                                 | 96 (24.0)                              | 0.737   |
| Hypoxia                         | 0       | 392 (62.5)                                 | 217 (70.0)                             | 0.029   |
| Temperature                     | 199     | 36.9 [36.4,37.5]                           | 36.6 [36.2,37.1]                       | <0.001  |
| NEWS2                           | 0       |                                            |                                        | 0.038   |
| 0                               |         | 107 (11.8)                                 | 43 (10.8)                              |         |
| 1                               |         | 125 (13.7)                                 | 39 (9.8)                               |         |
| 2                               |         | 127 (14.0)                                 | 53 (13.2)                              |         |
| 2+                              |         | 391 (43.0)                                 | 207 (51.7)                             |         |
| nan                             |         | 160 (17.6)                                 | 58 (14.5)                              |         |
| <b>Laboratory parameters</b>    |         |                                            |                                        |         |
| Neutrophils                     | 2       | 4.9 [3.4,7.6]                              | 4.8 [3.3,6.9]                          | 0.479   |
| Lymphocytes                     | 1       | 0.9 [0.6,1.3]                              | 0.8 [0.5,1.2]                          | 0.005   |
| NLR                             | 2       | 5.4 [3.1,9.9]                              | 5.8 [3.5,10.2]                         | 0.195   |

|                        |     |                      |                      |        |
|------------------------|-----|----------------------|----------------------|--------|
| Creatinine             | 16  | 83.0 [64.0,115.0]    | 92.0 [74.0,126.0]    | <0.001 |
| Urea                   | 536 | 6.8 [4.3,12.0]       | 6.6 [4.4,10.6]       | 0.573  |
| Estimated GFR          | 43  | 73.0 [48.5,97.0]     | 63.5 [44.0,81.0]     | <0.001 |
| Albumin                | 107 | 37.0 [33.0,41.0]     | 38.0 [34.0,41.0]     | 0.009  |
| CRP                    | 21  | 70.0 [25.0,142.0]    | 54.0 [24.0,102.0]    | <0.001 |
| DDimer                 | 727 | 1.1 [0.6,2.8]        | 0.9 [0.5,1.9]        | 0.019  |
| Ferritin               | 501 | 815.0 [366.2,1499.0] | 712.0 [357.5,1294.0] | 0.341  |
| <b>Co-morbidities</b>  |     |                      |                      |        |
| Stroke                 | 0   | 74 (8.1)             | 22 (5.5)             | 0.117  |
| TIA                    | 0   | 12 (1.3)             | 5 (1.2)              | 0.87   |
| Hypertension           | 0   | 315 (34.6)           | 144 (36.0)           | 0.674  |
| Diabetes               | 0   | 267 (29.3)           | 106 (26.5)           | 0.326  |
| AF                     | 0   | 72 (7.9)             | 42 (10.5)            | 0.154  |
| IHD                    | 0   | 162 (17.8)           | 78 (19.5)            | 0.513  |
| Heart Failure          | 0   | 61 (6.7)             | 34 (8.5)             | 0.299  |
| COPD                   | 0   | 74 (8.1)             | 32 (8.0)             | 0.977  |
| Asthma                 | 0   | 84 (9.2)             | 39 (9.8)             | 0.846  |
| Cancer                 | 0   | 64 (7.0)             | 21 (5.2)             | 0.278  |
| Kidney disease         | 0   | 122 (13.4)           | 62 (15.5)            | 0.359  |
| HIV                    | 0   | 22 (2.4)             | 10 (2.5)             | 0.916  |
| Solid organ transplant | 0   | 25 (2.7)             | 19 (4.8)             | 0.092  |
| Frailty                | 0   | 204 (22.4)           | 58 (14.5)            | 0.001  |

Note: p-value was from Kruskal-Wallis test for continuous variables and Chi-squared test for categorical variables.

Abbreviations: BMI: Body Mass Index, TIA: Transient Ischaemic Attack, IHD: Ischemic Heart Disease, COPD: Chronic Obstructive Pulmonary Disease, HIV: Human Immunodeficiency Virus, MAP: Mean Arterial Pressure, SPO2: Oxygen Saturation, GFR: Glomerular Filtration Rate, CRP: C-Reactive Protein, NLR: Neutrophils and Lymphocytes Ratio, NEWS2: National Early Warning Score 2.

1 Groups with non-Alpha and Alpha variants were not significantly different in mean age (62yrs vs  
2 64yrs,  $p=0.22$ ) or ethnicity. The proportion of admissions who were female was larger in the group  
3  
4 infected with the Alpha variant compared to those infected by non-Alpha variants (48.0% vs 41.8%,  
5  
6  $p=0.01$ ).  
7  
8  
9

10  
11 Cases infected with the Alpha variant were less likely to be frail (14.5% vs 22.4%  $p=0.001$ ). A higher  
12  
13 proportion of those in the Alpha variant group were obese (30.2% v 24.8%,  $p=0.048$ ). Other minor  
14  
15 differences in comorbidities between groups are shown in Table 2, but did not reach statistical  
16  
17 significance.  
18  
19

20  
21  
22 On admission a higher proportion of those infected with the Alpha variant were hypoxic (70.0% vs  
23  
24 62.5%,  $p=0.029$ ), the main indicator of severe disease. CRP on admission was lower in the Alpha  
25  
26 variant group (54 mg/L IQR: 24.0-102.0) compared to those infected with non-Alpha variants (70  
27  
28 mg/L, IQR: 25.0-142.0  $p<0.001$ ). Differences in other laboratory parameters did not meet either  
29  
30 statistical or clinical significance.  
31  
32  
33

### 34 35 36 **Multivariate analysis of factors associated with severity of COVID-19 on admission**

37  
38 Multivariate logistic regression was applied to look at associations with severity of disease on  
39  
40 admission as measured by hypoxia (Table 3), equivalent to WHO ordinal scale of  $\geq 4$ . Age, sex,  
41  
42 ethnicity, co-morbidities and variant status (Alpha vs non-Alpha) were entered into the model.  
43  
44 Severity of disease on admission, as measured by hypoxia, was the outcome variable. Age was a  
45  
46 significant predictor of severity, with an odds ratio of 1.02 (CI 1.01-1.03,  $p<0.001$ ) for hypoxia on  
47  
48 admission for every advancing year. Obesity was associated with severity, giving an OR 1.70 (CI  
49  
50 1.28-2.26,  $p<0.001$ ). Infection with the Alpha variant was also associated with increased hypoxia on  
51  
52 admission (OR 1.68 CI: 1.26-2.24,  $p<0.001$ ). Other variables were not significantly associated with  
53  
54 hypoxia on admission, including sex, ethnicity and co-morbidities.  
55  
56  
57  
58  
59  
60

**Table 3: Odds ratios for severity (hypoxia) at admission from multivariate logistic****regression model**

|                             | OR   | p-value | 95% CI      |
|-----------------------------|------|---------|-------------|
| Age                         | 1.02 | <0.001  | 1.01 - 1.03 |
| Male                        | 0.96 | 0.75    | 0.73 - 1.25 |
| <b>Ethnicity</b>            |      |         |             |
| non-White                   | 1.15 | 0.35    | 0.86 - 1.55 |
| Unknown                     | 1.20 | 0.36    | 0.81 - 1.77 |
| <b>Comorbidity</b>          |      |         |             |
| BMI>30                      | 1.70 | <0.001  | 1.28 - 2.26 |
| Cardiovascular              | 0.79 | 0.15    | 0.58 - 1.09 |
| Hypertension                | 1.11 | 0.52    | 0.81 - 1.51 |
| Diabetes                    | 0.75 | 0.07    | 0.55 - 1.02 |
| Chronic respiratory disease | 1.20 | 0.32    | 0.83 - 1.74 |
| Cancer                      | 0.60 | 0.06    | 0.35 - 1.02 |
| Kidney disease              | 0.74 | 0.17    | 0.48 - 1.14 |
| HIV                         | 1.74 | 0.16    | 0.80 - 3.78 |
| Organ transplant            | 0.79 | 0.55    | 0.37 - 1.71 |
| Frailty                     | 0.96 | 0.85    | 0.64 - 1.45 |
| Alpha variant               | 1.68 | <0.001  | 1.26 - 2.24 |

## Comparison of non-sequenced and sequenced cases in wave two

1  
2 We assessed for differences between the non-sequenced and sequenced inpatient cases to identify  
3  
4 any possible bias in those that were sequenced. Demographics, admission physiological and  
5  
6 laboratory parameters, and the outcome measure of hypoxia on admission are presented in Table  
7  
8  
9 4. There were similar proportions of the outcome measure, hypoxia on admission, in both the  
10  
11 sequenced and non-sequenced inpatient group (47% vs 50%,  $p=0.381$ ). There was no difference in  
12  
13 the proportion of males in the sequenced group compared to the non-sequenced group (52.2% vs  
14  
15 53.8%,  $p=0.595$ ), as with obesity (39.5% vs 38.4%,  $p=0.783$ ) or the proportion of those from non-  
16  
17 White ethnic backgrounds (41.4% vs 40.5%,  $p=0.934$ ). On average, sequenced inpatient cases were  
18  
19 slightly older (63 vs 57 years,  $p<0.001$ ) and had a larger proportion of some comorbidities than non-  
20  
21 sequenced cases.  
22  
23  
24  
25  
26  
27  
28  
29  
30  
31  
32  
33  
34  
35  
36  
37  
38  
39  
40  
41  
42  
43  
44  
45  
46  
47  
48  
49  
50  
51  
52  
53  
54  
55  
56  
57  
58  
59  
60

**Table 4, Patient characteristics of sequenced and non-sequenced inpatients in wave two.**

|                             | Non-sequenced | Sequenced   | P-Value |
|-----------------------------|---------------|-------------|---------|
| n                           | 1031          | 472         |         |
| Age                         | 57.3 (21.0)   | 62.9 (19.9) | <0.001  |
| Male                        | 538 (52.2)    | 254 (53.8)  | 0.595   |
| Ethnicity                   |               |             | 0.934   |
| White                       | 418 (40.5)    | 194 (41.1)  |         |
| non-White                   | 417 (40.4)    | 192 (40.7)  |         |
| Unknown                     | 196 (19.0)    | 86 (18.2)   |         |
| <b>Comorbidities</b>        |               |             |         |
| BMI>30                      | 302 (38.4)    | 139 (39.5)  | 0.783   |
| Cardiovascular              | 218 (21.1)    | 142 (30.1)  | <0.001  |
| Hypertension                | 300 (29.1)    | 172 (36.4)  | 0.005   |
| Diabetes                    | 269 (26.1)    | 127 (26.9)  | 0.787   |
| Chronic respiratory disease | 143 (13.9)    | 82 (17.4)   | 0.091   |
| Cancer                      | 46 (4.5)      | 26 (5.5)    | 0.452   |
| Kidney Disease              | 116 (11.3)    | 74 (15.7)   | 0.021   |
| HIV                         | 26 (2.5)      | 11 (2.3)    | 0.966   |
| Organ transplant            | 31 (3.0)      | 18 (3.8)    | 0.509   |
| Frailty                     | 108 (10.5)    | 76 (16.1)   | 0.003   |
| Hypoxia                     | 491 (47.6)    | 237 (50.2)  | 0.381   |



## Discussion

1  
2 Our data from a large, multi-site healthcare institution in one of the worst affected regions  
3  
4 internationally provides a large dataset for in-depth comparison; for instance we report a similar  
5  
6 number of cases as reported from a national observational cohort study from Japan [16]. Our  
7  
8 hospitalised cohort shares similar demographics to other city populations in the UK, representative  
9  
10 of London with around 40% of individuals from non-White ethnicities [17]. This compares to national  
11  
12 population studies where the average age of cases was much lower and with lower proportion from  
13  
14 non-White ethnicities [8, 18].  
15  
16

17  
18  
19  
20 There were threefold more SARS-CoV-2 RNA positive cases reported by the hospital laboratory in  
21  
22 wave two. Partly this is attributed to increased testing capacity and changing testing strategy  
23  
24 throughout 2020 (Supplementary Figure 1). Due to capacity limits, during wave one it was not local  
25  
26 policy to offer testing to outpatients and those not requiring admission, instead relying on clinical  
27  
28 diagnosis. Healthcare workers were not offered occupational health testing until the end of wave  
29  
30 one. We therefore restricted comparison to inpatient and nosocomial cases.  
31  
32  
33

34  
35  
36 There were almost twice as many admitted cases in wave two compared with wave one (1503 v  
37  
38 838). This is consistent with a higher local community incidence as reported by the ONS infection  
39  
40 survey with 3.5% of individuals in London infected in January 2021 [19], compared with 2.2% of  
41  
42 individuals in London at the peak of wave one [1]. The increase in peak hospital occupancy in wave  
43  
44 two has also been reported nationally [20]. A major contributor to this increase in hospital  
45  
46 admissions is likely to be the emergence of the Alpha variant, which is reported to be more  
47  
48 transmissible [[7]].  
49  
50  
51

52  
53  
54 Our finding is the first study in hospitalised cohorts to show increased severity of disease with the  
55  
56 Alpha variant, as defined by hypoxia on admission which is equivalent to WHO ordinal scale of  $\geq 4$   
57  
58 and a key marker of severe disease. This is consistent with increased virulence of the Alpha variant  
59  
60 as reported in community studies, which show increased hospitalisation [18] and mortality [8] with

1 the Alpha variant. Notably however, these community studies failed to control for co-morbidities. The  
2 association with severity we find persists even after adjustment for age, sex, and co-morbidities.  
3  
4 Moreover, testing in the first wave prior to emergence of the Alpha variant was strict due to limited  
5 testing capacity, potentially leading to an ascertainment bias towards more severe cases in the first  
6 wave. This makes it even more striking that the association of the Alpha variant with severe disease  
7 is so prominent.  
8  
9  
10  
11  
12  
13  
14

15 Notably the only other published study in hospital cohorts showed no difference in severity as  
16 measured by the composite outcome of need for ventilation or death [10]. Broadly the two cohorts  
17 from these hospital cohorts are similar, with an average age of around 60 and a high proportion of  
18 non-white ethnicities. In general this supports the external validity of our findings, however replication  
19 in dissimilar cohorts are awaited. Interestingly, despite male sex being widely reported to be a risk  
20 factor for severe disease our multivariate model confirms findings by these authors that sex is not  
21 significantly associated with severity in hospitalised cohorts after adjusted analysis.  
22  
23  
24  
25  
26  
27  
28  
29  
30  
31  
32  
33

34 The lack of association between severity and male sex may corresponds to the increase in the  
35 proportion of females in the admitted cohort of wave two and those infected with Alpha, accounting  
36 for an extra 5% of admissions with SARS-CoV-2 infection. Unpublished data referenced by  
37 NERVTAG [21] suggests the Alpha variant may be more severe in hospitalised females, who may  
38 have increased mortality or requirement for ICU care. Our data, showing an increase in the  
39 proportion of females in the admission cohort and lack of expected association of severity with male  
40 sex is consistent with the finding that Alpha may show increased virulence in females.  
41  
42  
43  
44  
45  
46  
47  
48  
49  
50  
51

52 We also included an assessment of bias by comparing characteristics of non-sequenced cases with  
53 those successfully sequenced. We found no significant difference between the proportion with the  
54 outcome measure of hypoxia on admission between our sequenced and non-sequenced cases,  
55 suggesting no significant bias towards severity in the sequenced group, which was predominantly  
56 made up of cases of the Alpha variant.  
57  
58  
59  
60

1  
2  
3  
4 Admitted cases in wave two were also around half as likely to have a diagnosis of frailty, which may  
5  
6 be due to fewer admissions from care homes during wave two, which has been reported both  
7  
8 nationally [22] and internationally [23]. Additionally, admitted cases were around a third less likely to  
9  
10 have cancer in wave two. Both of these reductions may also be as a result of individuals shielding,  
11  
12 and therefore at reduced risk for acquiring SARS-CoV-2 infection. Other differences in comorbidities  
13  
14 between waves were small and of unclear clinical significance.  
15  
16

17  
18  
19  
20 One additional striking observation was the similarity in number of nosocomial cases in wave one  
21  
22 (n=96 of 934 [10%] inpatient cases) and wave two (n=137 of 1640 [8%] inpatient cases).  
23  
24 Interestingly, nosocomial cases in wave one increased and started to fall before impact of the main  
25  
26 infection control interventions of banning hospital visitors (March 25th), introducing universal surgical  
27  
28 mask wearing (28th March 2020) and universal regular inpatient screening (after the first wave). In  
29  
30 comparison, all these measures were in place prior to the second wave. The similar number of cases  
31  
32 in wave two may in part be due to increased inpatient screening, which would identify asymptomatic  
33  
34 cases, or introduction of the more transmissible Alpha variant which made up the vast majority of  
35  
36 our sequenced nosocomial cases.  
37  
38  
39  
40  
41  
42

43 Some healthcare institutions report far fewer nosocomial acquisitions; for instance an academic  
44  
45 hospital in Boston, USA reported only 2 nosocomial cases in over 9000 admissions [24]. This could  
46  
47 be due to greater availability of side rooms for isolation or their use of N95 masks by HCWs, which  
48  
49 may decrease transmission between HCWs and patients. In contrast, current UK public health policy  
50  
51 recommends surgical facemasks for patient interactions unless performing aerosol generating  
52  
53 procedures [34]. This incidence of nosocomial infection is a major challenge for UK healthcare  
54  
55 institutions, with associated crude mortality at around 30% during the first wave [25,26]. For this  
56  
57 reason it will be important to further investigate the factors involved in nosocomial acquisition in both  
58  
59 waves.  
60

1  
2 Our study population comes from one city and therefore needs to be compared with findings in other  
3 regions. Our dataset included cases confirmed by SARS-CoV-2 RNA testing in our laboratory, so  
4 may miss those diagnosed only clinically. A follow-up study is needed to assess the effect of the  
5 Alpha variant on mortality, when the wave two cohort has completed hospital stay.  
6  
7  
8  
9

10  
11  
12  
13 The number of cases diagnosed, admissions and nosocomial cases were higher in wave two than  
14 wave one, likely due to the increased incidence caused by the more transmissible Alpha variant.  
15  
16 Infection with the Alpha variant was associated with severity as measured by hypoxic on admission,  
17  
18 the first such finding in hospitalised cohorts.  
19  
20  
21  
22  
23  
24  
25  
26  
27  
28  
29  
30  
31  
32  
33  
34  
35  
36  
37  
38  
39  
40  
41  
42  
43  
44  
45  
46  
47  
48  
49  
50  
51  
52  
53  
54  
55  
56  
57  
58  
59  
60

## Contributions

LBS and WW were involved in the conceptualization, methodology, formal analysis of the synthesised data and writing (original drafting, review, and editing). TC, AA-M and GN were involved in investigation being responsible for whole genome sequencing and analysis of results. RB, FH and LdJ were involved in resources, administration and data curation. YW, JE, VC were involved in supervision, funding acquisition and drafting (review and editing). All authors agreed the final manuscript.

## References

1. Edelstein M, Obi C, Chand M, Hopkins S, Brown K, Ramsay M. SARS-CoV-2 infection in London, England: changes to community point prevalence around lockdown time, March–May 2020. *J Epidemiol Community Health*. 2020 [cited 10 Dec 2020]. doi:10.1136/jech-2020-214730
2. Official UK Coronavirus Dashboard. [cited 1 Mar 2021]. Available: <https://coronavirus.data.gov.uk/details/healthcare>
3. Kirby T. New variant of SARS-CoV-2 in UK causes surge of COVID-19. *Lancet Respir Med*. 2021;9: e20–e21.
4. Preliminary genomic characterisation of an emergent SARS-CoV-2 lineage in the UK defined by a novel set of spike mutations. 18 Dec 2020 [cited 24 Jan 2021]. Available: <https://virological.org/t/preliminary-genomic-characterisation-of-an-emergent-sars-cov-2-lineage-in-the-uk-defined-by-a-novel-set-of-spike-mutations/563>
5. Sparrow A, Carroll R, Pidd H. UK Covid: Boris Johnson says “great strides” made with vaccinations but many are yet to be reached – as it happened. *The Guardian*. 10 Feb 2021. Available: <http://www.theguardian.com/politics/live/2021/feb/10/uk-covid-news-shapps-summer-holidays-abroad-travel-coronavirus-vaccine-live-latest-updates>. Accessed 1 Mar

2021.

- 1  
2  
3 6. Chand M, Others. Investigation of novel SARS-COV-2 variant: Variant of Concern 202012/01  
4 (PDF). Public Health England PHE. 2020.
- 5  
6  
7  
8 7. Volz E, Mishra S, Chand M, Barrett JC, Johnson R, Geidelberg L, et al. Transmission of  
9 SARS-CoV-2 Lineage B.1.1.7 in England: Insights from linking epidemiological and genetic  
10 data. doi:10.1101/2020.12.30.20249034
- 11  
12  
13  
14  
15  
16 8. Davies NG, Jarvis CI, John Edmunds W, Jewell NP, Diaz-Ordaz K, Keogh RH. Increased  
17 mortality in community-tested cases of SARS-CoV-2 lineage B.1.1.7. *Nature*. 2021;593: 270–  
18 274.
- 19  
20  
21  
22  
23  
24 9. Challen R, Brooks-Pollock E, Read JM, Dyson L, Tsaneva-Atanasova K, Danon L. Risk of  
25 mortality in patients infected with SARS-CoV-2 variant of concern 202012/1: matched cohort  
26 study. *BMJ*. 2021;372. doi:10.1136/bmj.n579
- 27  
28  
29  
30  
31  
32 10. Frampton D, Rampling T, Cross A, Bailey H, Heaney J, Byott M, et al. Genomic characteristics  
33 and clinical effect of the emergent SARS-CoV-2 B.1.1.7 lineage in London, UK: a whole-  
34 genome sequencing and hospital-based cohort study. *Lancet Infect Dis*. 2021.  
35 doi:10.1016/S1473-3099(21)00170-5
- 36  
37  
38  
39  
40  
41  
42 11. Surveillance definitions for COVID-19. [cited 24 Jan 2021]. Available:  
43 <https://www.ecdc.europa.eu/en/covid-19/surveillance/surveillance-definitions>
- 44  
45  
46  
47  
48 12. Quick J. nCoV-2019 sequencing protocol v1 (protocols.io.bbmuik6w). protocols.io. ZappyLab,  
49 Inc.; 2020. doi:10.17504/protocols.io.bbmuik6w
- 50  
51  
52  
53 13. Artic Network. [cited 24 Jan 2021]. Available: [https://artic.network/ncov-2019/ncov2019-](https://artic.network/ncov-2019/ncov2019-bioinformatics-sop.html)  
54 [bioinformatics-sop.html](https://artic.network/ncov-2019/ncov2019-bioinformatics-sop.html)
- 55  
56  
57  
58 14. pangolin. Github; Available: <https://github.com/cov-lineages/pangolin>
- 59  
60  
15. e-research. Acknowledging - Rosalind research computing infrastructure. [cited 6 Mar 2021].

Available: <https://rosalind.kcl.ac.uk/acknowledging/>

16. Saito S, Asai Y, Matsunaga N, Hayakawa K, Terada M, Ohtsu H, et al. First and second COVID-19 waves in Japan: A comparison of disease severity and characteristics. *Journal of Infection*. 2020. doi:10.1016/j.jinf.2020.10.033
17. White E. Ethnicity and National Identity in England and Wales - Office for National Statistics. Office for National Statistics; 11 Dec 2012 [cited 18 Jun 2021]. Available: <https://www.ons.gov.uk/peoplepopulationandcommunity/culturalidentity/ethnicity/articles/ethnicityandnationalidentityinenglandandwales/2012-12-11>
18. Nyberg T, Twohig KA, Harris RJ, Seaman SR, Flannagan J, Allen H, et al. Risk of hospital admission for patients with SARS-CoV-2 variant B.1.1.7: cohort analysis. *BMJ*. 2021;373. doi:10.1136/bmj.n1412
19. Kara Steel And. Coronavirus (COVID-19) Infection Survey, UK - Office for National Statistics. Office for National Statistics; 8 Jan 2021 [cited 1 Feb 2021]. Available: <https://www.ons.gov.uk/peoplepopulationandcommunity/healthandsocialcare/conditionsanddiseases/bulletins/coronaviruscovid19infectionsurveypilot/8january2021>
20. England NHS. NHS England » Hospitals admit one third of COVID patients in a single month. [cited 1 Mar 2021]. Available: <https://www.england.nhs.uk/2021/02/hospitals-admit-one-third-of-covid-patients-in-a-single-month/>
21. Scientific Advisory Group for Emergencies. NERVTAG: Update note on B.1.1.7 severity, 11 February 2021. GOV.UK; 12 Feb 2021 [cited 5 Mar 2021]. Available: <https://www.gov.uk/government/publications/nervtag-update-note-on-b117-severity-11-february-2021>
22. John S. Deaths involving COVID-19 in the care sector, England and Wales - Office for National Statistics. Office for National Statistics; 2 Jul 2020 [cited 25 Feb 2021]. Available: <https://www.ons.gov.uk/peoplepopulationandcommunity/birthsdeathsandmarriages/deaths/articles/deathsinvolvingcovid19inthecaresectorenglandandwales/deathsoccurringupto12june2020>

andregisteredupto20june2020provisional

23. Ioannidis JPA, Axfors C, Contopoulos-Ioannidis DG. Second versus first wave of COVID-19 deaths: shifts in age distribution and in nursing home fatalities. medRxiv. 2020; 2020.11.28.20240366.
24. Rhee C, Baker M, Vaidya V, Tucker R, Resnick A, Morris CA, et al. Incidence of Nosocomial COVID-19 in Patients Hospitalized at a Large US Academic Medical Center. JAMA Netw Open. 2020;3: e2020498.
25. Carter B, Collins JT, Barlow-Pay F, Rickard F, Bruce E, Verduri A, et al. Nosocomial COVID-19 infection: examining the risk of mortality. The COPE-Nosocomial Study (COVID in Older PEople). J Hosp Infect. 2020;106: 376–384.
26. Snell LB, Fisher CL, Taj U, Merrick B, Alcolea-Medina A, Charalampous T, et al. Combined epidemiological and genomic analysis of nosocomial SARS-CoV-2 transmission identifies community social distancing as the dominant intervention reducing outbreaks. bioRxiv. medRxiv; 2020. doi:10.1101/2020.11.17.20232827.
34. Public Health England. COVID-19: infection prevention and control (IPC). GOV.UK; 10 Jan 2020 [cited 15 Mar 2021]. Available: <https://www.gov.uk/government/publications/wuhan-novel-coronavirus-infection-prevention-and-control>
35. Carter B, Collins JT, Barlow-Pay F, Rickard F, Bruce E, Verduri A, et al. Nosocomial COVID-19 infection: examining the risk of mortality. The COPE-Nosocomial Study (COVID in Older PEople). J Hosp Infect. 2020;106: 376–384. doi:10.1016/j.jhin.2020.07.013
36. Snell LB, Fisher CL, Taj U, Merrick B, Alcolea-Medina A, Charalampous T, et al. Combined epidemiological and genomic analysis of nosocomial SARS-CoV-2 transmission identifies community social distancing as the dominant intervention reducing outbreaks. bioRxiv. medRxiv; 2020. doi:10.1101/2020.11.17.20232827



1  
2  
3  
4  
5  
6  
7  
8  
9  
10  
11  
12  
13  
14  
15  
16  
17  
18  
19  
20  
21  
22  
23  
24  
25  
26  
27  
28  
29  
30  
31  
32  
33  
34  
35  
36  
37  
38  
39  
40  
41  
42  
43  
44  
45  
46  
47  
48  
49  
50  
51  
52  
53  
54  
55  
56  
57  
58  
59  
60

For peer review only

1  
2  
3  
4  
5  
6  
7  
8  
9  
10  
11  
12  
13  
14  
15  
16  
17  
18  
19  
20  
21  
22  
23  
24  
25  
26  
27  
28  
29  
30  
31  
32  
33  
34  
35  
36  
37  
38  
39  
40  
41  
42  
43  
44  
45  
46  
47  
48  
49  
50  
51  
52  
53  
54  
55  
56  
57  
58  
59  
60

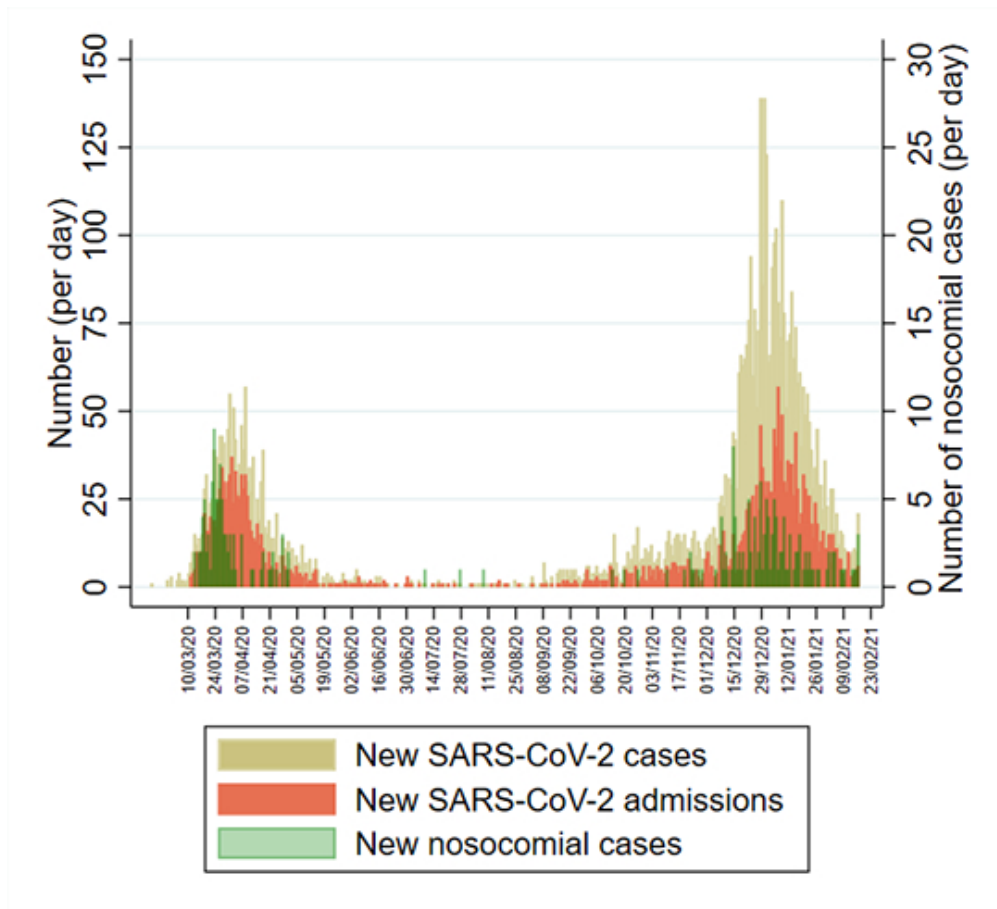

Distribution of laboratory confirmed SARS-CoV-2 cases over time. Daily incidence of new cases (beige), newly admitted cases (orange) and nosocomial acquisitions (green) over time.

190x173mm (72 x 72 DPI)

1  
2  
3  
4  
5  
6  
7  
8  
9  
10  
11  
12  
13  
14  
15  
16  
17  
18  
19  
20  
21  
22  
23  
24  
25  
26  
27  
28  
29  
30  
31  
32  
33  
34  
35  
36  
37  
38  
39  
40  
41  
42  
43  
44  
45  
46  
47  
48  
49  
50  
51  
52  
53  
54  
55  
56  
57  
58  
59  
60

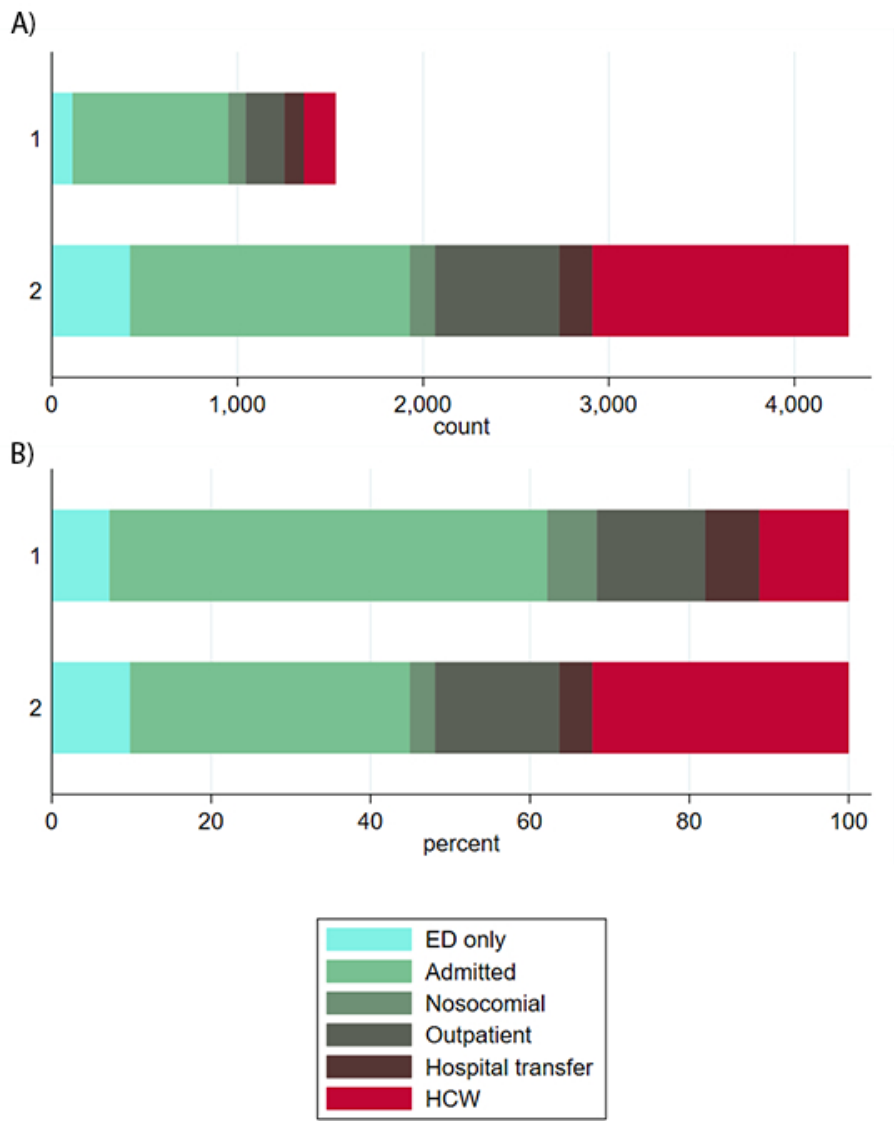

(A) Absolute number of cases within the different hospital cohorts during wave one (upper) and wave two (lower). (B) Proportion of cases within the different hospital cohorts during wave one (upper) and wave two (lower).

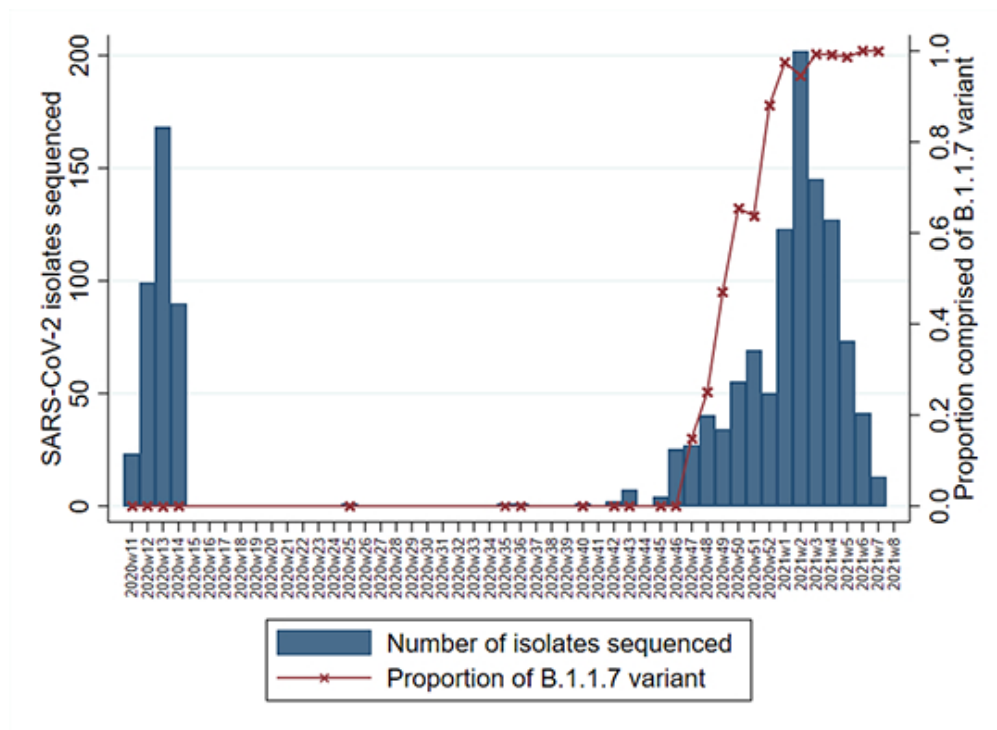

Number of cases with sequenced SARS-CoV-2 isolates by epi-week (bar) and the proportion of which were made up of the alpha variant B.1.1.7 (red line)

190x138mm (72 x 72 DPI)

1  
2  
3  
4  
5  
6  
7  
8  
9  
10  
11  
12  
13  
14  
15  
16  
17  
18  
19  
20  
21  
22  
23  
24  
25  
26  
27  
28  
29  
30  
31  
32  
33  
34  
35  
36  
37  
38  
39  
40  
41  
42  
43  
44  
45  
46  
47  
48  
49  
50  
51  
52  
53  
54  
55  
56  
57  
58  
59  
60

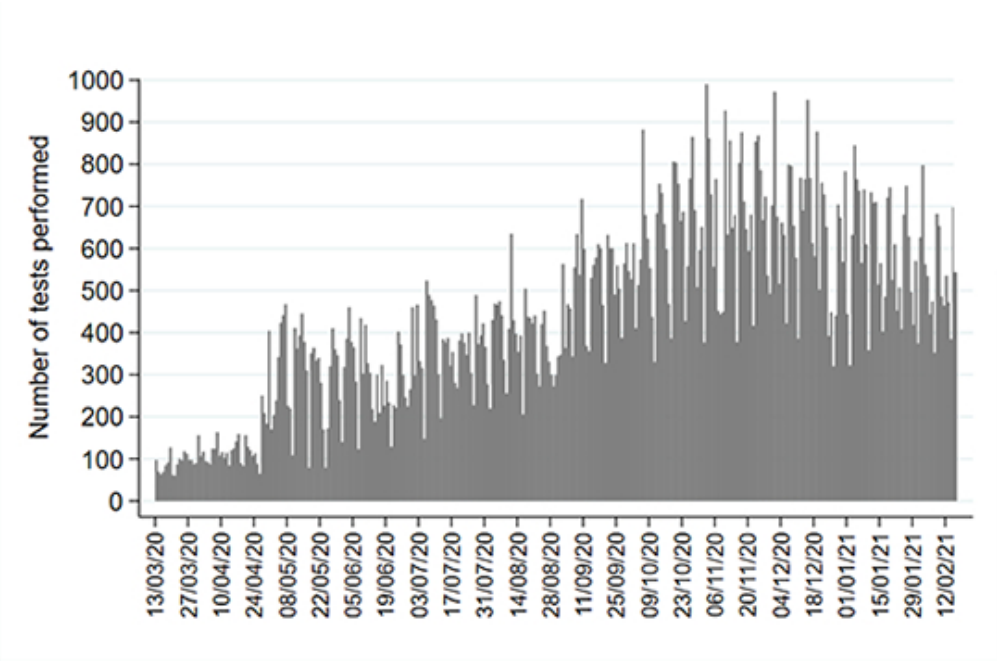

Our laboratory began testing on 13th March 2020 with initial capacity for around 150 PCR tests per day, before increasing to around 500 tests per day in late April during wave one, and up to 1000 tests per day during wave two

190x125mm (72 x 72 DPI)

**STROBE 2007 (v4) Statement—Checklist of items that should be included in reports of *cohort studies***

| Section/Topic                | Item # | Recommendation                                                                                                                                                                       | Reported on page # |
|------------------------------|--------|--------------------------------------------------------------------------------------------------------------------------------------------------------------------------------------|--------------------|
| <b>Title and abstract</b>    | 1      | (a) Indicate the study's design with a commonly used term in the title or the abstract                                                                                               | 2                  |
|                              |        | (b) Provide in the abstract an informative and balanced summary of what was done and what was found                                                                                  | 2                  |
| <b>Introduction</b>          |        |                                                                                                                                                                                      |                    |
| Background/rationale         | 2      | Explain the scientific background and rationale for the investigation being reported                                                                                                 | 6                  |
| Objectives                   | 3      | State specific objectives, including any prespecified hypotheses                                                                                                                     | 6                  |
| <b>Methods</b>               |        |                                                                                                                                                                                      |                    |
| Study design                 | 4      | Present key elements of study design early in the paper                                                                                                                              | 7-9                |
| Setting                      | 5      | Describe the setting, locations, and relevant dates, including periods of recruitment, exposure, follow-up, and data collection                                                      | 7-9                |
| Participants                 | 6      | (a) Give the eligibility criteria, and the sources and methods of selection of participants. Describe methods of follow-up                                                           | 8                  |
|                              |        | (b) For matched studies, give matching criteria and number of exposed and unexposed                                                                                                  | NA                 |
| Variables                    | 7      | Clearly define all outcomes, exposures, predictors, potential confounders, and effect modifiers. Give diagnostic criteria, if applicable                                             | 7-9                |
| Data sources/<br>measurement | 8*     | For each variable of interest, give sources of data and details of methods of assessment (measurement). Describe comparability of assessment methods if there is more than one group | 8-9                |
| Bias                         | 9      | Describe any efforts to address potential sources of bias                                                                                                                            | 15                 |
| Study size                   | 10     | Explain how the study size was arrived at                                                                                                                                            | 12                 |
| Quantitative variables       | 11     | Explain how quantitative variables were handled in the analyses. If applicable, describe which groupings were chosen and why                                                         | 8-9                |
| Statistical methods          | 12     | (a) Describe all statistical methods, including those used to control for confounding                                                                                                | 9-10               |
|                              |        | (b) Describe any methods used to examine subgroups and interactions                                                                                                                  | NA                 |
|                              |        | (c) Explain how missing data were addressed                                                                                                                                          | 9                  |
|                              |        | (d) If applicable, explain how loss to follow-up was addressed                                                                                                                       | NA                 |
|                              |        | (e) Describe any sensitivity analyses                                                                                                                                                | NA                 |
| <b>Results</b>               |        |                                                                                                                                                                                      |                    |

|                          |     |                                                                                                                                                                                                              |                             |
|--------------------------|-----|--------------------------------------------------------------------------------------------------------------------------------------------------------------------------------------------------------------|-----------------------------|
| Participants             | 13* | (a) Report numbers of individuals at each stage of study—eg numbers potentially eligible, examined for eligibility, confirmed eligible, included in the study, completing follow-up, and analysed            | 10-12                       |
|                          |     | (b) Give reasons for non-participation at each stage                                                                                                                                                         | 15                          |
|                          |     | (c) Consider use of a flow diagram                                                                                                                                                                           | Not done                    |
| Descriptive data         | 14* | (a) Give characteristics of study participants (eg demographic, clinical, social) and information on exposures and potential confounders                                                                     | 15-18                       |
|                          |     | (b) Indicate number of participants with missing data for each variable of interest                                                                                                                          | In tables                   |
|                          |     | (c) Summarise follow-up time (eg, average and total amount)                                                                                                                                                  | NA                          |
| Outcome data             | 15* | Report numbers of outcome events or summary measures over time                                                                                                                                               | Page 18<br>Table 1, Table 2 |
| Main results             | 16  | (a) Give unadjusted estimates and, if applicable, confounder-adjusted estimates and their precision (eg, 95% confidence interval). Make clear which confounders were adjusted for and why they were included | 12-18<br>Table 1,2          |
|                          |     | (b) Report category boundaries when continuous variables were categorized                                                                                                                                    | NA                          |
|                          |     | (c) If relevant, consider translating estimates of relative risk into absolute risk for a meaningful time period                                                                                             | NA                          |
| Other analyses           | 17  | Report other analyses done—eg analyses of subgroups and interactions, and sensitivity analyses                                                                                                               | None performed              |
| <b>Discussion</b>        |     |                                                                                                                                                                                                              |                             |
| Key results              | 18  | Summarise key results with reference to study objectives                                                                                                                                                     | 22                          |
| <b>Limitations</b>       |     |                                                                                                                                                                                                              |                             |
| Interpretation           | 20  | Give a cautious overall interpretation of results considering objectives, limitations, multiplicity of analyses, results from similar studies, and other relevant evidence                                   | 22-23                       |
| Generalisability         | 21  | Discuss the generalisability (external validity) of the study results                                                                                                                                        | 23                          |
| <b>Other information</b> |     |                                                                                                                                                                                                              |                             |
| Funding                  | 22  | Give the source of funding and the role of the funders for the present study and, if applicable, for the original study on which the present article is based                                                | 4                           |

\*Give information separately for cases and controls in case-control studies and, if applicable, for exposed and unexposed groups in cohort and cross-sectional studies.

**Note:** An Explanation and Elaboration article discusses each checklist item and gives methodological background and published examples of transparent reporting. The STROBE checklist is best used in conjunction with this article (freely available on the Web sites of PLoS Medicine at <http://www.plosmedicine.org/>, Annals of Internal Medicine at <http://www.annals.org/>, and Epidemiology at <http://www.epidem.com/>). Information on the STROBE Initiative is available at [www.strobe-statement.org](http://www.strobe-statement.org).

# BMJ Open

## A descriptive comparison of admission characteristics between pandemic waves and multivariable analysis of the association of the Alpha variant with disease severity in inner London.

|                                 |                                                                                                                                                                                                                                                                                                                                                                                                                                                                                                                                                                                                                                                           |
|---------------------------------|-----------------------------------------------------------------------------------------------------------------------------------------------------------------------------------------------------------------------------------------------------------------------------------------------------------------------------------------------------------------------------------------------------------------------------------------------------------------------------------------------------------------------------------------------------------------------------------------------------------------------------------------------------------|
| Journal:                        | <i>BMJ Open</i>                                                                                                                                                                                                                                                                                                                                                                                                                                                                                                                                                                                                                                           |
| Manuscript ID                   | bmjopen-2021-055474.R1                                                                                                                                                                                                                                                                                                                                                                                                                                                                                                                                                                                                                                    |
| Article Type:                   | Original research                                                                                                                                                                                                                                                                                                                                                                                                                                                                                                                                                                                                                                         |
| Date Submitted by the Author:   | 16-Sep-2021                                                                                                                                                                                                                                                                                                                                                                                                                                                                                                                                                                                                                                               |
| Complete List of Authors:       | Snell, Luke; King's College London; Guy's and St Thomas' NHS Foundation Trust<br>Wang , Wenjuan; King's College London<br>Medina, Adela; Viapath; King's College London<br>Charalampous, Themoula; King's College London<br>Nebbia, Gaia; King's College London; Guy's and St Thomas' NHS Foundation Trust<br>Batra, Rahul; King's College London<br>de Jongh, Leonardo; Guy's and St Thomas' NHS Foundation Trust<br>Higgins, Finola; Guy's and St Thomas' NHS Foundation Trust<br>Wang, Yanzhong; King's College London<br>Edgeworth, Jonathan; King's College London; Guy's and St Thomas' NHS Foundation Trust<br>Curcin, Vasa; King's College London |
| <b>Primary Subject Heading</b>: | Infectious diseases                                                                                                                                                                                                                                                                                                                                                                                                                                                                                                                                                                                                                                       |
| Secondary Subject Heading:      | Epidemiology                                                                                                                                                                                                                                                                                                                                                                                                                                                                                                                                                                                                                                              |
| Keywords:                       | VIROLOGY, EPIDEMIOLOGY, Epidemiology < INFECTIOUS DISEASES, Public health < INFECTIOUS DISEASES                                                                                                                                                                                                                                                                                                                                                                                                                                                                                                                                                           |
|                                 |                                                                                                                                                                                                                                                                                                                                                                                                                                                                                                                                                                                                                                                           |

SCHOLARONE™  
Manuscripts





I, the Submitting Author has the right to grant and does grant on behalf of all authors of the Work (as defined in the below author licence), an exclusive licence and/or a non-exclusive licence for contributions from authors who are: i) UK Crown employees; ii) where BMJ has agreed a CC-BY licence shall apply, and/or iii) in accordance with the terms applicable for US Federal Government officers or employees acting as part of their official duties; on a worldwide, perpetual, irrevocable, royalty-free basis to BMJ Publishing Group Ltd ("BMJ") its licensees and where the relevant Journal is co-owned by BMJ to the co-owners of the Journal, to publish the Work in this journal and any other BMJ products and to exploit all rights, as set out in our [licence](#).

The Submitting Author accepts and understands that any supply made under these terms is made by BMJ to the Submitting Author unless you are acting as an employee on behalf of your employer or a postgraduate student of an affiliated institution which is paying any applicable article publishing charge ("APC") for Open Access articles. Where the Submitting Author wishes to make the Work available on an Open Access basis (and intends to pay the relevant APC), the terms of reuse of such Open Access shall be governed by a Creative Commons licence – details of these licences and which [Creative Commons](#) licence will apply to this Work are set out in our licence referred to above.

Other than as permitted in any relevant BMJ Author's Self Archiving Policies, I confirm this Work has not been accepted for publication elsewhere, is not being considered for publication elsewhere and does not duplicate material already published. I confirm all authors consent to publication of this Work and authorise the granting of this licence.

# A descriptive comparison of admission characteristics between pandemic waves and multivariable analysis of the association of the Alpha variant with disease severity in inner London.

Luke B. Snell MBBS\*, Wenjuan Wang PhD\*, Adela Alcolea-Medina MPhil, Themoula Charalampous PhD, Gaia Nebbia PhD, Rahul Batra MD, Leonardo de Jongh, Finola Higgins, Yanzhong Wang PhD, Jonathan D. Edgeworth PhD#, Vasa Curcin PhD#

1 King's College London, London, UK (L.B. Snell, W. Wang, A. Alcolea-Medina, T. Charalampous, G. Nebbia, R. Batra, Y. Wang, J.D. Edgeworth, V Curin)

2 Guy's and St Thomas' NHS Foundation Trust, London, UK (L.B. Snell, G. Nebbia, R. Batra, L. de Jongh, F. Higgins, J.D. Edgeworth)

3 Viapath, St Thomas' Hospital, London, UK (A. Alcolea-Medina)

\* These first authors contributed equally

# These authors were co-principal investigators

Corresponding author: Dr. Luke B Snell, St. Thomas' Hospital, Westminster Bridge Road, UK SE1 7EH, [luke.snell@nhs.net](mailto:luke.snell@nhs.net), 02071887188

**Running title:** Comparison of SARS-CoV-2 waves and alpha variant severity

**Article word count:** 3714

## Abstract

**Background.** The Alpha variant emerged and became the dominant circulating variant in the UK in late 2020. Current literature is unclear on whether the Alpha variant is associated with increased severity. We linked clinical data with viral genome sequence data to compare admitted cases between SARS-CoV-2 waves in London, and to investigate the association between Alpha variant and the severity of disease.

**Methods.** Clinical, demographic, laboratory and viral sequence data from electronic health record (EHR) systems was collected for all cases with a positive SARS-CoV-2 RNA test between March 13th 2020 and February 17th 2021 in a multi-site London healthcare institution. Multivariate analysis using logistic regression assessed risk factors for severity as defined by hypoxia at admission.

**Results** There were 5810 SARS-CoV-2 RNA positive cases of which 2341 were admitted (838 in wave one and 1503 in wave two). Both waves had a temporally aligned rise in nosocomial cases (96 in wave one, 137 in wave two). The Alpha variant was first identified on 15th November 2020 and increased rapidly to comprise 400/472 (85%) of sequenced isolates from admitted cases in wave two. A multivariate analysis identified risk factors for severity on admission, such as age (OR 1.02 [CI 1.01-1.03] for every year older,  $p < 0.001$ ), obesity (OR 1.7 [CI 1.28-2.26],  $p < 0.001$ ) and infection with the Alpha variant (OR 1.68 [CI 1.26-2.24],  $p < 0.001$ ).

**Conclusions** Our analysis is the first in hospitalised cohorts to show increased severity of disease associated with the Alpha variant. The number of nosocomial cases was similar in both waves despite the introduction of many infection control interventions before wave two.

Abstract word count: 250

## Strengths and limitations of this study

- Published evidence on whether the alpha variant of SARS-CoV-2 has a higher case fatality is mixed.
- Our study benefits from a long study window, including patients since the beginning of the SARS-CoV-2 pandemic.
- We combine patient-level data with routinely performed genomic data, capturing a large proportion of inpatients with confirmed SARS-CoV-2 infection.
- Our analysis adjusts for comorbidities, a feature missing from many of the population-level studies currently published.

## Ethics

1  
2 Ethical approval for data informatics was granted by The London Bromley Research Ethics  
3  
4 Committee (reference (20/HRA/1871)) to the King's Health Partners Data Analytics and Modelling  
5  
6 COVID-19 Group to collect clinically relevant data points from patients' electronic health records.  
7  
8  
9

10  
11 Whole genome sequencing of residual viral isolates was conducted under the COVID-19 Genomics  
12  
13 UK (COG-UK) consortium study protocol, which was approved by the Public Health England  
14  
15 Research Ethics and Governance Group (reference: R&D NR0195).  
16  
17  
18

## Acknowledgements

19  
20  
21  
22 The authors acknowledge use of the research computing facility at King's College London, Rosalind  
23  
24 (<https://rosalind.kcl.ac.uk>), which is delivered in partnership with the National Institute for Health  
25  
26 Research (NIHR) Biomedical Research Centres at South London & Maudsley and Guy's & St.  
27  
28 Thomas' NHS Foundation Trusts, and part-funded by capital equipment grants from the Maudsley  
29  
30 Charity (award 980) and Guy's & St. Thomas' Charity (TR130505). The views expressed are those  
31  
32 of the author(s) and not necessarily those of the NHS, the NIHR, King's College London, or the  
33  
34 Department of Health and Social Care.  
35  
36  
37  
38  
39  
40

## Funding

41  
42  
43 FH, LBS, YW, and VC are supported by the National Institute for Health Research (NIHR) Biomedical  
44  
45 Research Centre programme of Infection and Immunity (RJ112/N027) based at Guy's and St  
46  
47 Thomas' National Health Service NHS) Foundation Trust and King's College London.  
48  
49  
50

51  
52 This work was also supported by The Health Foundation and the Guy's and St Thomas' Charity.  
53  
54  
55

56  
57 COG-UK is supported by funding from the Medical Research Council (MRC) part of UK Research &  
58  
59 Innovation (UKRI), the National Institute of Health Research (NIHR) and Genome Research Limited,  
60  
operating as the Wellcome Sanger Institute.

1  
2 **Data sharing**  
3

4 Genomic data is publicly available on GISAID, please contact the authors for accession numbers.  
5

6 Our ethical approval precludes public sharing of patient-level data.  
7  
8  
9

10  
11 **Patient and public involvement**  
12

13 As this study was conducted to meet an urgent public health need, patient and public involvement  
14 was not sought  
15  
16  
17

18  
19  
20 **Competing interests**  
21

22 None to declare.  
23  
24  
25  
26  
27  
28  
29  
30  
31  
32  
33  
34  
35  
36  
37  
38  
39  
40  
41  
42  
43  
44  
45  
46  
47  
48  
49  
50  
51  
52  
53  
54  
55  
56  
57  
58  
59  
60

## Background

SARS-CoV-2 infection has led to the death of over 1 million individuals worldwide since its emergence in China during December 2019, with over 120,000 deaths reported in the UK as of July 2021. In London, the estimated incidence of new cases in the first wave peaked around March 23rd 2020 at 2.2% [1] and then rapidly declined following non-pharmacological interventions. Hospital admissions peaked about 1 week later [2] reflecting the median period of symptoms before hospital presentation. A “second wave” of infections started in London around the beginning of October 2020 [3].

Genome sequencing identified the Alpha variant (the B.1.1.7 lineage) around the South East of England, which spread rapidly as part of the emerging second wave [4]. This occurred prior to widespread vaccination, with only 25% of the adult population receiving the first dose by mid-February 2021 [5]. The Alpha variant has been associated with increased transmissibility in community studies [6] [7], and community studies associate the variant with increased mortality [8] [9]. However, the single published study in hospitalised patients suggested no increase in need for ventilation or mortality [10].

Changes in transmissibility and severity have the potential to affect the burden on healthcare systems, and modify the characteristics of cases presenting to hospitals including the demographics, comorbidities and severity of disease associated with SARS-CoV-2 infection.

## Objectives

We linked clinical datasets with local SARS-CoV-2 variant analysis to compare admission characteristics of hospitalised cases during the two waves of infection and to look at the association of the alpha variant with the severity of disease at presentation to hospital.

## Methods

### Setting

Guy's and St Thomas' NHS Foundation Trust (GSTT) is a multi-site healthcare institution providing general and emergency services predominantly to the South London boroughs of Lambeth and Southwark. An acute-admitting site (St Thomas' Hospital) has an adult emergency department, with a large critical care service including one of the UK's eight nationally commissioned extra corporeal membrane oxygenation (ECMO) centres for severe respiratory failure. A second site (Guy's Hospital) provides more inpatient services such as elective surgery, cancer care and other specialist services. A paediatric hospital (Evelina London) acts as a general and specialised referral centre. Several satellite sites for specialist services like dialysis, rehabilitation and long term care are also part of the institution. GSTT receives patients from regional hospitals predominantly to critical care through 'mutual aid' schemes.

### SARS-CoV-2 laboratory testing

Our laboratory began testing on 13<sup>th</sup> March 2020 with initial capacity for around 150 PCR tests per day, before increasing to around 500 tests per day in late April during wave one, and up to 1000 tests per day during wave two (Supplementary Figure 1).

Testing commenced during the first wave on 13<sup>th</sup> March 2020 limited to cases requiring admission or inpatients who had symptoms of fever or cough, as per national recommendation; guidance suggested cases which did not require admission should not be tested. For wave two, all cases admitted to hospital were screened and underwent universal interval screening at varying time points. Staff testing for symptomatic healthcare workers was also introduced towards the end of wave one. Comparative analysis was therefore restricted to SARS-CoV-2 RNA positive cases requiring admission. Cases without laboratory confirmation of SARS-CoV-2 infection were not included.



1 Assays used for the detection of SARS-CoV-2 RNA include PCR testing using Aus Diagnostics or  
2 by the Hologic Aptima SARS-CoV-2 Assay. Nucleic acid was first extracted using the QIAGEN  
3 QIAasymphony SP system and a QIAasymphony DSP Virus/Pathogen Mini Kit (catalogue No: 937036)  
4 with the off-board lysis protocol.  
5  
6  
7  
8  
9  
10  
11  
12

### 13 **Definitions and participants**

14  
15 Cases were identified by the first positive SARS-CoV-2 RNA test. Cases were placed in mutually  
16 exclusive categories with the following definitions: 1) outpatients 2) testing through occupational  
17 health 3) emergency department attenders not subsequently admitted within 14 days 4) patients  
18 admitted within 14 days of a positive test 5) nosocomial cases, defined based on ECDC definitions,  
19 as those having a first positive test on day 8 or later after admission to hospital where COVID-19  
20 was not suspected on admission [11] and 6) interhospital transfers.  
21  
22  
23  
24  
25  
26  
27  
28  
29  
30  
31

32 For the purpose of comparison, only the inpatient group admitted within 14 days following a positive  
33 test, were taken forward for onward comparison. This methodology of only including admissions was  
34 adopted to prevent increased testing during the pandemic affecting case ascertainment and biasing  
35 severity of cases. This is evidenced in Supplementary Figure 1, with tests increasing steadily from  
36 100 per day to more than 1000 per day. Additionally, in wave two more interhospital transfers of  
37 severe cases requiring extracorporeal membrane oxygenation were received, mostly several days  
38 after admission. This category of patients were therefore excluded from analysis to prevent biasing  
39 towards severe disease.  
40  
41  
42  
43  
44  
45  
46  
47  
48  
49  
50  
51

52 A composite datapoint for 'hypoxia' was created, equivalent to WHO ordinal scale of  $\geq 4$  [12], with  
53 cases taken to be hypoxic if on admission they had oxygen saturations of  $< 94\%$ , if they were  
54 recorded as requiring supplemental oxygen, or if the fraction of inspired oxygen was recorded as  
55 being greater than 0.21.  
56  
57  
58  
59  
60

## Determination of SARS-CoV-2 lineage

Whole genome sequencing of residual samples from SARS-CoV-2 cases was performed using GridION (Oxford Nanopore Technology), using version 3 of the ARTIC protocol [13] and bioinformatics pipeline [14]. Samples were selected for sequencing if the corrected CT value was 33 or below, or the Hologic Aptima assay was above 1000 RLU. During the first wave, sequencing occurred between March 1st - 31st, whilst sequencing in the second wave restarted in November 2020 - March 2021. Variants were called using updated versions of pangolin 2.0 [15]. We considered all cases in wave one to be non-Alpha variants, as our wave one cut-off of 25th July 2020 was 6 weeks prior to first identified cases of the Alpha variant in the UK [16] and before Alpha variant was first identified in our population in November 2020.

## Data sources, extraction and integration

Clinical, laboratory and demographic data for all cases with a laboratory reported SARS-CoV-2 PCR RNA test on nose and throat swabs or lower respiratory tract specimens were extracted from hospital electronic health record (EHR) data sources using records closest to the test date. Data were linked to the Index of Multiple Deprivation (IMD). Age, sex and ethnicity were extracted from EPR. Self-reported ONS ethnic categories were stratified into White (British, Irish, Gypsy and White-Other) or non-White (Black [African, Caribbean, and Black-Other], Asian [Bangladeshi, Chinese, Indian, Pakistan, and Asian-Other] and Mixed/Other). Numbers for which data were missing is listed by each variable. Comorbidities and medication history were extracted from the EPR and e-Noting using natural language processing (NLP). If a comorbidity was not recorded it was assumed not to be present. Cases were characterised as having/not having a past medical history of hypertension, cardiovascular disease (stroke, transient ischaemic attack, atrial fibrillation, congestive heart failure, ischaemic heart disease, peripheral artery disease or atherosclerotic disease), diabetes mellitus, chronic kidney disease, chronic respiratory disease (chronic obstructive pulmonary disease, asthma, bronchiectasis or pulmonary fibrosis) and neoplastic disease (solid tumours, haematological neoplasias or metastatic disease). Obesity was defined as either obesity present in the notes, or recorded Body Mass Index (BMI)  $\geq 30$  kg/m<sup>2</sup>. Medicines data were extracted using both structured

queries and natural language processing tools with medical and drug dictionaries .Additionally, checks on free text data were performed by a cardiovascular clinician to ensure the information was accurate.

Analysis was carried out on the secure Rosalind high-performance computer infrastructure [17] running Jupyter Notebook 6.0.3, R 3.6.3 and Python 3.7.6.

### **Statistical analysis and outcome measures**

Descriptive statistics were summarised with mean and standard deviation (SD) for continuous variables if the distribution is normal and median and interquartile range (IQR) if the distribution is non-normal. Count and percentages were used for categorical variables. For the comparisons of variables for wave one versus wave two variables, Alpha variant versus non-Alpha variants, as well as sequenced patients versus non-sequenced patients in wave two, Kruskal-Wallis test was used for continuous variables and Chi-squared test for categorical variables with significance level of  $p=0.05$ . Multivariate analysis was performed using logistic regression to assess the odds ratios of different risk factors (including age, sex, ethnicity (White, non-White, Unknown), variant status (Alpha or non-Alpha), and cardiovascular disease, hypertension, diabetes, chronic respiratory disease, cancer, kidney disease, HIV, transplant, and frailty) for hypoxia on admission as the binary outcome indicating severity at admission. Cases with missing datapoints were dropped from. Variables to be included in the multivariate analysis. were chosen by literature review and expert opinion (see Supplementary Material).

## Results

### General epidemiology and results of viral sequencing.

Figure 1 shows the incidence of SARS-CoV-2 cases, SARS-CoV-2 admissions, and nosocomial cases since March 13th 2020. In total 5810 individuals had a positive SARS-CoV-2 PCR test up until the data extraction date of 17th February 2021. Two “waves” are evident with July 25th taken as a separation date between waves, at which point a minimum of 12 wave one cases remained in hospital. Wave one comprised 1528 cases (26.3%) from when laboratory testing commenced on March 13th to peak rapidly between the 1st and 8th April 2020 with 57 new cases, before falling to a baseline by May 12th 2020. Ninety-one percent (1391/1528) of all cases in wave one occurred during these 60 days. Wave two comprised 4282 cases (73.7%), with incidence first increasing gradually from the beginning of October. There was then a period of rapidly escalating incidence from about 10th December, peaking on 28th December 2020 when 139 cases per day were diagnosed. 3446/4282 (80%) of wave two cases were detected during a comparable 60 day period between 10th December 2020 and 8th February 2021. In both waves, nosocomial cases peaked early, increasing along with admissions but then fell while the number of community admissions continued at peak levels.

**Figure 1:** Distribution of laboratory confirmed SARS-CoV-2 cases over time. Daily incidence of new cases (beige), newly admitted cases (orange) and nosocomial acquisitions (green) over time.

Individuals with a positive test were placed into six categories (Figure 2). The 5810 SARS-CoV-2 cases were categorised as follows, inpatients admitted within 14 days of a positive test (n=2341), healthcare workers (n=1549), outpatients (n=874), emergency department (ED) attenders not subsequently admitted (n=532), inter-hospital transfers (n=281) and nosocomial cases (n=233). Some observed differences between waves one and two reflected the increased availability of testing particularly for outpatients (208;13.6% v 666;15.6%), people sent home from ED (111;7.3% v 421; 9.8%) and healthcare workers (171;11.2% v 1378;32.2%). There were also more interhospital transfers of known COVID-19 cases in wave two (177;4.1% v 104;6.8% in wave one). In wave two,

the number of admissions increased (1503; 35.1% v 838; 54.8%) along with nosocomial cases (137;3.2% v 96;6.3%) compared with wave one.

**Figure 2 (A)** Absolute number of cases within the different hospital cohorts during wave one (upper) and wave two (lower). **(B)** Proportion of cases within the different hospital cohorts during wave one (upper) and wave two (lower).

Figure 3 shows the 1470 successfully sequenced SARS-CoV-2 isolates over time, with 382 from wave one and 1088 from wave two. Sequencing was successful for 216/838 (26%) admitted cases from wave one, 472/1503 (31%) admitted cases in wave two, and 121/233 (52%) nosocomial cases. The proportion of Alpha variant increased rapidly after the first Alpha isolate was identified on 15th November 2020, accounting for approximately two thirds within 3 weeks, and almost 100% (600/617 isolates, 97%) in January 2021. In the second wave, the Alpha variant made up 83% (908/1088) of all sequenced isolates, 85% (400/472) of sequenced isolates from admitted cases, and 88% (51/59) of sequenced isolates from nosocomial cases. In addition, two cases of the B.1.351 beta variant of concern were also detected in the wave two admission cohort.

**Figure 3** Number of cases with sequenced SARS-CoV-2 isolates by epi-week (bar) and the proportion of which were made up of the alpha variant B.1.1.7 (red line)

### Comparison of characteristics of admitted cases between waves one and two

Descriptive statistics of cases admitted during wave one (n=838) and wave two (n=1503) were compared (Table 1). There was a statistically significant difference in mean age of 2 years (62yrs in wave one v 60yrs in wave two, p=0.019), however admitted cases were more likely to be female in wave two (47.3% v 41.8%, p=0.011). A larger proportion of admitted cases in wave two were obese (29.1% v 24.6%, p=0.02). Comparison of comorbidities showed that those in wave two were less likely to have a diagnosis of frailty (11.5% v 22.8%, p<0.001), history of stroke (4.3% v 8.6%, p<0.001) or cancer (4.8% v 7.2%, p=0.022). There was no significant difference in proportion with

known comorbidities of diabetes, kidney disease, hypertension, cardiovascular disease or respiratory disease.

**Table 1: Descriptive statistics of the cohort for wave one (n=838) and wave two (n=1503) admissions**

|                                 | Missing | Wave one<br>n (%) | Wave two<br>n (%) | Wave one<br>Median [IQR] | Wave two<br>Median [IQR] | P-Value |
|---------------------------------|---------|-------------------|-------------------|--------------------------|--------------------------|---------|
| <b>Demographics</b>             |         |                   |                   |                          |                          |         |
| Age                             | 0       |                   |                   | 62.0 [49.0,78.0]         | 60.0 [47.0,74.0]         | 0.019   |
| Male                            | 0       | 488 (58.2)        | 792 (52.7)        |                          |                          | 0.011   |
| Ethnicity                       | 0       |                   |                   |                          |                          | 0.013   |
| White                           |         | 331 (39.5)        | 598 (39.8)        |                          |                          |         |
| Asian                           |         | 64 (7.6)          | 121 (8.1)         |                          |                          |         |
| Black-African                   |         | 177 (21.1)        | 262 (17.4)        |                          |                          |         |
| Black-Caribbean                 |         | 73 (8.7)          | 98 (6.5)          |                          |                          |         |
| Mixed                           |         | 15 (1.8)          | 18 (1.2)          |                          |                          |         |
| Other                           |         | 45 (5.4)          | 107 (7.1)         |                          |                          |         |
| Unknown                         |         | 133 (15.9)        | 299 (19.9)        |                          |                          |         |
| BMI                             | 577     |                   |                   | 27.0 [23.8,31.7]         | 27.7 [24.0,32.9]         | 0.022   |
| BMI>30                          |         | 206 (24.6)        | 438 (29.1)        |                          |                          | 0.02    |
| BMI>40                          |         | 34 (4.1)          | 86 (5.7)          |                          |                          | 0.098   |
| <b>Physiological parameters</b> |         |                   |                   |                          |                          |         |
| Heart Rate                      | 360     |                   |                   | 84.0 [75.0,94.0]         | 81.0 [72.0,91.0]         | <0.001  |
| Heart Rate>100                  |         | 105 (12.5)        | 142 (9.4)         |                          |                          | 0.02    |
| <b>Blood pressure</b>           |         |                   |                   |                          |                          |         |
| Systolic                        | 369     |                   |                   | 125.0 [113.0,139.0]      | 127.0 [115.0,141.0]      | 0.013   |
| Diastolic                       | 369     |                   |                   | 73.0 [65.0,80.0]         | 75.0 [68.0,82.0]         | <0.001  |
| MAP                             | 369     |                   |                   | 90.7 [82.2,99.0]         | 92.3 [84.7,101.3]        | <0.001  |
| Respiratory Rate                | 359     |                   |                   | 19.0 [18.0,22.0]         | 19.0 [18.0,22.0]         | 0.764   |
| Respiratory Rate>20             |         | 200 (23.9)        | 365 (24.3)        |                          |                          | 0.86    |
| Hypoxia                         | 658     | 370 (64.3)        | 726 (65.5)        |                          |                          | 0.67    |
| Temperature                     | 361     |                   |                   | 36.9 [36.4,37.5]         | 36.6 [36.2,37.2]         | <0.001  |
| NEWS2                           | 405     |                   |                   |                          |                          | 0.86    |
| 0                               |         | 95 (11.3)         | 173 (11.5)        |                          |                          |         |
| 1                               |         | 108 (12.9)        | 192 (12.8)        |                          |                          |         |
| 2                               |         | 117 (14.0)        | 188 (12.5)        |                          |                          |         |
| 2+                              |         | 371 (44.3)        | 692 (46.0)        |                          |                          |         |
| <b>Laboratory parameters</b>    |         |                   |                   |                          |                          |         |

|    |                        |      |            |                      |                      |        |
|----|------------------------|------|------------|----------------------|----------------------|--------|
| 1  | Neutrophils            | 8    |            | 4.9 [3.4,7.6]        | 5.0 [3.3,7.5]        | 0.724  |
| 2  | Lymphocytes            | 7    |            | 0.9 [0.6,1.3]        | 0.9 [0.6,1.4]        | 0.741  |
| 3  | NLR                    | 8    |            | 5.4 [3.1,9.9]        | 5.4 [3.2,9.8]        | 0.951  |
| 4  | Creatinine             | 43   |            | 83.0 [64.0,115.0]    | 86.0 [68.0,117.0]    | 0.065  |
| 5  | Urea                   | 855  |            | 7.0 [4.6,12.2]       | 6.0 [4.3,9.9]        | 0.001  |
| 6  | Estimated GFR          | 114  |            | 73.0 [48.0,98.0]     | 69.0 [48.0,89.0]     | 0.001  |
| 7  | Albumin                | 185  |            | 37.0 [32.0,40.0]     | 38.0 [34.0,41.0]     | <0.001 |
| 8  | CRP                    | 61   |            | 74.5 [26.0,148.0]    | 51.0 [18.0,103.8]    | <0.001 |
| 9  | DDimer                 | 1297 |            | 1.1 [0.6,3.0]        | 0.9 [0.5,2.2]        | 0.001  |
| 10 | Ferritin               | 905  |            | 855.0 [394.0,1533.5] | 699.0 [342.0,1359.0] | 0.05   |
| 11 | <b>Co-morbidities</b>  |      |            |                      |                      |        |
| 12 | Stroke                 | 0    | 72 (8.6)   | 64 (4.3)             |                      | <0.001 |
| 13 | TIA                    | 0    | 9 (1.1)    | 20 (1.3)             |                      | 0.731  |
| 14 | Hypertension           | 0    | 288 (34.4) | 464 (30.9)           |                      | 0.091  |
| 15 | Diabetes               | 0    | 246 (29.4) | 384 (25.5)           |                      | 0.052  |
| 16 | AF                     | 0    | 63 (7.5)   | 115 (7.7)            |                      | 0.972  |
| 17 | IHD                    | 0    | 146 (17.4) | 244 (16.2)           |                      | 0.495  |
| 18 | Heart Failure          | 0    | 54 (6.4)   | 105 (7.0)            |                      | 0.679  |
| 19 | COPD                   | 0    | 64 (7.6)   | 109 (7.3)            |                      | 0.796  |
| 20 | Asthma                 | 0    | 74 (8.8)   | 138 (9.2)            |                      | 0.835  |
| 21 | Cancer                 | 0    | 60 (7.2)   | 72 (4.8)             |                      | 0.022  |
| 22 | Kidney disease         | 0    | 112 (13.4) | 181 (12.0)           |                      | 0.389  |
| 23 | HIV                    | 0    | 21 (2.5)   | 36 (2.4)             |                      | 0.979  |
| 24 | Solid organ Transplant | 0    | 24 (2.9)   | 49 (3.3)             |                      | 0.686  |
| 25 | Frailty                | 0    | 191 (22.8) | 173 (11.5)           |                      | <0.001 |

†: p-value was from Kruskal-Wallis test for continuous variables and Chi-squared test for categorical variables.

Abbreviations: BMI: Body Mass Index, TIA: Transient Ischaemic Attack, IHD: Ischemic Heart Disease, COPD: Chronic Obstructive Pulmonary Disease, HIV: Human Immunodeficiency Virus, MAP: Mean Arterial Pressure, SPO2: Oxygen Saturation, GFR: Glomerular Filtration Rate, CRP: C-Reactive Protein, NLR: Neutrophils and Lymphocytes Ratio, NEWS2: National Early Warning Score 2.

1  
2  
3  
4  
5  
6  
7  
8  
9 There were no significant differences between waves in the proportion with severe SARS-CoV-2  
10 disease upon admission as judged by hypoxia (64.3% in wave one vs 65.5% in wave two,  $p=0.67$ )  
11 or tachypnoea (respiratory rate $>20$ ) (23.9% vs 24.3%,  $p=0.86$ ). There were small differences in other  
12  
13 physiological parameters on admission, some of which reached statistical significance but  
14  
15 differences were not clinically relevant.  
16  
17  
18  
19  
20  
21  
22  
23  
24

25 Laboratory markers were compared between waves (Table 1). There were small but significant  
26 differences, such as lower CRP (median 51.0 mg/dL (IQR: 18.0-103.8) v 74.5 mg/dL (IQR: 26.0-  
27 148.0),  $p<0.001$ ) and lower ferritin (699.0 [IQR: 342.0-1359.0] v 855.0 [IQR: 394.0-1533.5],  $p=0.05$ )  
28  
29 in wave two. There were other small statistically significant differences without clear clinical  
30  
31 significance, such as a lower D-Dimer in wave two (0.9 mg/L FEU [IQR: 0.5-2.2] v 1.1 mg/L FEU  
32 [IQR:0.6-3.0],  $p=0.001$ ), and lower estimated GFR (69.0 ml/min [IQR: 48.0-89.0] v 73.0 ml/min [IQR:  
33 48.0-98.0],  $p=0.001$ ), lower urea (6.0 mmol/L [IQR: 4.3-9.3] v 7.0 mmol/L [IQR: 4.6-12.2],  $p=0.001$ )  
34  
35 and higher albumin (38.0 g/L [IQR: 34.0-41.0 g/L] vs 37.0 g/L [IQR: 32.0-40.0],  $p<0.001$ ). There was  
36  
37 no significant difference with neutrophils, lymphocytes, neutrophils and lymphocytes ratio (NLR),  
38  
39 creatinine and glucose.  
40  
41  
42  
43  
44  
45  
46  
47  
48  
49  
50  
51

## 52 **Comparison of characteristics of admitted cases infected with Alpha and non-Alpha variants**

53 Given the reported association between increased disease severity and transmission with the Alpha  
54 variant, we compared demographic, physiological and laboratory parameters between admitted  
55 cases with infection caused by Alpha variant ( $n=400$ ) with non-Alpha ( $n=910$ ) variants (Table 2).  
56  
57  
58  
59  
60



**Table 2: Descriptive statistics of the cohort for non-Alpha variant (n=910) and Alpha variant (n=400) admissions**

|                                 | Missing | Non Alpha variant n (%) | Alpha variant n (%) | Non Alpha variant value [IQR] | Alpha variant value [IQR] | P-Value |
|---------------------------------|---------|-------------------------|---------------------|-------------------------------|---------------------------|---------|
| <b>Demographics</b>             |         |                         |                     |                               |                           |         |
| Age                             | 0       |                         |                     | 62.0 [49.0,78.0]              | 64.0 [52.0,78.0]          | 0.22    |
| Male                            |         | 530 (58.2)              | 208 (52.0)          |                               |                           | 0.042   |
| Ethnicity                       | 0       |                         |                     |                               |                           | 0.402   |
| White                           |         | 358 (39.3)              | 164 (41.0)          |                               |                           |         |
| Asian                           |         | 71 (7.8)                | 38 (9.5)            |                               |                           |         |
| Black-African                   |         | 191 (21.0)              | 67 (16.8)           |                               |                           |         |
| Black-Caribbean                 |         | 78 (8.6)                | 27 (6.8)            |                               |                           |         |
| Mixed                           |         | 16 (1.8)                | 6 (1.5)             |                               |                           |         |
| Other                           |         | 50 (5.5)                | 23 (5.8)            |                               |                           |         |
| Unknown                         |         | 146 (16.0)              | 75 (18.8)           |                               |                           |         |
| BMI                             | 334     |                         |                     | 27.1 [23.8,31.7]              | 28.1 [24.0,34.2]          | 0.036   |
| BMI>30                          |         | 226 (24.8)              | 121 (30.2)          |                               |                           | 0.048   |
| BMI>40                          |         | 36 (4.0)                | 26 (6.5)            |                               |                           | 0.063   |
| <b>Physiological parameters</b> |         |                         |                     |                               |                           |         |
| Heart Rate                      | 198     |                         |                     | 84.0 [74.0,94.0]              | 80.0 [72.0,90.0]          | 0.001   |
| Heart Rate>100                  |         | 118 (13.0)              | 36 (9.0)            |                               |                           | 0.05    |
| <b>Blood pressure</b>           |         |                         |                     |                               |                           |         |
| Systolic                        | 201     |                         |                     | 125.0 [113.0,139.5]           | 127.0 [115.0,142.0]       | 0.138   |
| Diastolic                       | 201     |                         |                     | 73.0 [65.0,80.0]              | 75.0 [67.0,83.0]          | 0.01    |
| MAP                             | 201     |                         |                     | 90.7 [82.3,99.2]              | 92.7 [84.0,101.7]         | 0.022   |
| Respiratory Rate                | 194     |                         |                     | 19.0 [18.0,21.0]              | 19.0 [18.0,22.0]          | 0.591   |
| Respiratory Rate>20             |         | 209 (23.0)              | 96 (24.0)           |                               |                           | 0.737   |
| Hypoxia                         | 0       | 392 (62.5)              | 217 (70.0)          |                               |                           | 0.029   |
| Temperature                     | 199     |                         |                     | 36.9 [36.4,37.5]              | 36.6 [36.2,37.1]          | <0.001  |
| NEWS2                           | 0       |                         |                     |                               |                           | 0.038   |
| 0                               |         | 107 (11.8)              | 43 (10.8)           |                               |                           |         |
| 1                               |         | 125 (13.7)              | 39 (9.8)            |                               |                           |         |
| 2                               |         | 127 (14.0)              | 53 (13.2)           |                               |                           |         |
| 2+                              |         | 391 (43.0)              | 207 (51.7)          |                               |                           |         |
| nan                             |         | 160 (17.6)              | 58 (14.5)           |                               |                           |         |
| <b>Laboratory parameters</b>    |         |                         |                     |                               |                           |         |
| Neutrophils                     | 2       |                         |                     | 4.9 [3.4,7.6]                 | 4.8 [3.3,6.9]             | 0.479   |
| Lymphocytes                     | 1       |                         |                     | 0.9 [0.6,1.3]                 | 0.8 [0.5,1.2]             | 0.005   |

|                        |     |            |                      |                      |        |
|------------------------|-----|------------|----------------------|----------------------|--------|
| NLR                    | 2   |            | 5.4 [3.1,9.9]        | 5.8 [3.5,10.2]       | 0.195  |
| Creatinine             | 16  |            | 83.0 [64.0,115.0]    | 92.0 [74.0,126.0]    | <0.001 |
| Urea                   | 536 |            | 6.8 [4.3,12.0]       | 6.6 [4.4,10.6]       | 0.573  |
| Estimated GFR          | 43  |            | 73.0 [48.5,97.0]     | 63.5 [44.0,81.0]     | <0.001 |
| Albumin                | 107 |            | 37.0 [33.0,41.0]     | 38.0 [34.0,41.0]     | 0.009  |
| CRP                    | 21  |            | 70.0 [25.0,142.0]    | 54.0 [24.0,102.0]    | <0.001 |
| DDimer                 | 727 |            | 1.1 [0.6,2.8]        | 0.9 [0.5,1.9]        | 0.019  |
| Ferritin               | 501 |            | 815.0 [366.2,1499.0] | 712.0 [357.5,1294.0] | 0.341  |
| <b>Co-morbidities</b>  |     |            |                      |                      |        |
| Stroke                 | 0   | 74 (8.1)   | 22 (5.5)             |                      | 0.117  |
| TIA                    | 0   | 12 (1.3)   | 5 (1.2)              |                      | 0.87   |
| Hypertension           | 0   | 315 (34.6) | 144 (36.0)           |                      | 0.674  |
| Diabetes               | 0   | 267 (29.3) | 106 (26.5)           |                      | 0.326  |
| AF                     | 0   | 72 (7.9)   | 42 (10.5)            |                      | 0.154  |
| IHD                    | 0   | 162 (17.8) | 78 (19.5)            |                      | 0.513  |
| Heart Failure          | 0   | 61 (6.7)   | 34 (8.5)             |                      | 0.299  |
| COPD                   | 0   | 74 (8.1)   | 32 (8.0)             |                      | 0.977  |
| Asthma                 | 0   | 84 (9.2)   | 39 (9.8)             |                      | 0.846  |
| Cancer                 | 0   | 64 (7.0)   | 21 (5.2)             |                      | 0.278  |
| Kidney disease         | 0   | 122 (13.4) | 62 (15.5)            |                      | 0.359  |
| HIV                    | 0   | 22 (2.4)   | 10 (2.5)             |                      | 0.916  |
| Solid organ transplant | 0   | 25 (2.7)   | 19 (4.8)             |                      | 0.092  |
| Frailty                | 0   | 204 (22.4) | 58 (14.5)            |                      | 0.001  |

† p-value was from Kruskal-Wallis test for continuous variables and Chi-squared test for categorical variables.

Abbreviations: BMI: Body Mass Index, TIA: Transient Ischaemic Attack, IHD: Ischemic Heart Disease, COPD: Chronic Obstructive Pulmonary Disease, HIV: Human Immunodeficiency Virus, MAP: Mean Arterial Pressure, SPO2: Oxygen Saturation, GFR: Glomerular Filtration Rate, CRP: C-Reactive Protein, NLR: Neutrophils and Lymphocytes Ratio, NEWS2: National Early Warning Score 2.

1 Groups with non-Alpha and Alpha variants were not significantly different in mean age (62yrs vs  
2 64yrs,  $p=0.22$ ) or ethnicity. The proportion of admissions who were female was larger in the group  
3  
4 infected with the Alpha variant compared to those infected by non-Alpha variants (48.0% vs 41.8%,  
5  
6  $p=0.01$ ).  
7  
8  
9

10  
11 Cases infected with the Alpha variant were less likely to be frail (14.5% vs 22.4%  $p=0.001$ ). A higher  
12  
13 proportion of those in the Alpha variant group were obese (30.2% v 24.8%,  $p=0.048$ ). Other minor  
14  
15 differences in comorbidities between groups are shown in Table 2, but did not reach statistical  
16  
17 significance.  
18  
19

20  
21  
22 On admission a higher proportion of those infected with the Alpha variant were hypoxic (70.0% vs  
23  
24 62.5%,  $p=0.029$ ), the main indicator of severe disease. CRP on admission was lower in the Alpha  
25  
26 variant group (54 mg/L IQR: 24.0-102.0) compared to those infected with non-Alpha variants (70  
27  
28 mg/L, IQR: 25.0-142.0  $p<0.001$ ). Differences in other laboratory parameters did not meet either  
29  
30 statistical or clinical significance.  
31  
32  
33

### 34 35 36 **Multivariate analysis of factors associated with severity of COVID-19 on admission**

37  
38  
39 Multivariate logistic regression was applied to look at associations with severity of disease on  
40  
41 admission as measured by hypoxia (Table 3), equivalent to WHO ordinal scale of  $\geq 4$  [12]. Age, sex,  
42  
43 ethnicity, comorbidities and variant status (Alpha vs non-Alpha) were entered into the model.  
44  
45 Severity of disease on admission, as measured by hypoxia, was the outcome variable. Age was a  
46  
47 significant predictor of severity, with an odds ratio of 1.02 (CI 1.01-1.03,  $p<0.001$ ) for hypoxia on  
48  
49 admission for every advancing year. Obesity was associated with severity, giving an OR 1.70 (CI  
50  
51 1.28-2.26,  $p<0.001$ ). Infection with the Alpha variant was also associated with increased hypoxia on  
52  
53 admission (OR 1.68 CI: 1.26-2.24,  $p<0.001$ ). Other variables were not significantly associated with  
54  
55 hypoxia on admission, including sex, ethnicity and comorbidities.  
56  
57  
58  
59  
60

**Table 3: Odds ratios for severity (hypoxia) at admission from multivariate logistic****regression model**

|                             | OR   | p-value | 95% CI      |
|-----------------------------|------|---------|-------------|
| Age                         | 1.02 | <0.001  | 1.01 - 1.03 |
| Male                        | 0.96 | 0.75    | 0.73 - 1.25 |
| <b>Ethnicity</b>            |      |         |             |
| non-White                   | 1.15 | 0.35    | 0.86 - 1.55 |
| Unknown                     | 1.20 | 0.36    | 0.81 - 1.77 |
| <b>Comorbidity</b>          |      |         |             |
| BMI>30                      | 1.70 | <0.001  | 1.28 - 2.26 |
| Cardiovascular              | 0.79 | 0.15    | 0.58 - 1.09 |
| Hypertension                | 1.11 | 0.52    | 0.81 - 1.51 |
| Diabetes                    | 0.75 | 0.07    | 0.55 - 1.02 |
| Chronic respiratory disease | 1.20 | 0.32    | 0.83 - 1.74 |
| Cancer                      | 0.60 | 0.06    | 0.35 - 1.02 |
| Kidney disease              | 0.74 | 0.17    | 0.48 - 1.14 |
| HIV                         | 1.74 | 0.16    | 0.80 - 3.78 |
| Organ transplant            | 0.79 | 0.55    | 0.37 - 1.71 |
| Frailty                     | 0.96 | 0.85    | 0.64 - 1.45 |
| Alpha variant               | 1.68 | <0.001  | 1.26 - 2.24 |

Abbreviations: BMI: Body mass index, HIV: Human Immunodeficiency Virus

## Comparison of non-sequenced and sequenced cases in wave two

1  
2 We assessed for differences between the non-sequenced and sequenced inpatient cases to identify  
3  
4 any possible bias in those that were sequenced. Demographics, admission physiological and  
5  
6 laboratory parameters, and the outcome measure of hypoxia on admission are presented in Table  
7  
8  
9 4. There was no significant difference of the proportion with the outcome measure, hypoxia on  
10  
11 admission, in both the sequenced and non-sequenced inpatient group (47% vs 50%,  $p=0.381$ ).  
12  
13 There was no significant difference in the proportion of males in the sequenced group compared to  
14  
15 the non-sequenced group (52.2% vs 53.8%,  $p=0.595$ ), as with obesity (39.5% vs 38.4%,  $p=0.783$ )  
16  
17 or the proportion of those from non-White ethnic backgrounds (41.4% vs 40.5%,  $p=0.934$ ). On  
18  
19 average, sequenced inpatient cases were significantly older (63 vs 57 years,  $p<0.001$ ) and had a  
20  
21 larger proportion of some comorbidities than non-sequenced cases.  
22  
23  
24  
25  
26  
27  
28  
29  
30  
31  
32  
33  
34  
35  
36  
37  
38  
39  
40  
41  
42  
43  
44  
45  
46  
47  
48  
49  
50  
51  
52  
53  
54  
55  
56  
57  
58  
59  
60

**Table 4: Patient characteristics of sequenced and non-sequenced inpatients in wave two.**

|                                 | Non-sequenced | Sequenced   | P-Value |
|---------------------------------|---------------|-------------|---------|
| n                               | 1031          | 472         |         |
| Age (SD)                        | 57.3 (21.0)   | 62.9 (19.9) | <0.001  |
| Male (%)                        | 538 (52.2)    | 254 (53.8)  | 0.595   |
| Ethnicity (%)                   |               |             | 0.934   |
| White                           | 418 (40.5)    | 194 (41.1)  |         |
| non-White                       | 417 (40.4)    | 192 (40.7)  |         |
| Unknown                         | 196 (19.0)    | 86 (18.2)   |         |
| <b>Comorbidities</b>            |               |             |         |
| BMI>30 (%)                      | 302 (38.4)    | 139 (39.5)  | 0.783   |
| Cardiovascular (%)              | 218 (21.1)    | 142 (30.1)  | <0.001  |
| Hypertension (%)                | 300 (29.1)    | 172 (36.4)  | 0.005   |
| Diabetes (%)                    | 269 (26.1)    | 127 (26.9)  | 0.787   |
| Chronic respiratory Disease (%) | 143 (13.9)    | 82 (17.4)   | 0.091   |
| Cancer (%)                      | 46 (4.5)      | 26 (5.5)    | 0.452   |
| Kidney Disease (%)              | 116 (11.3)    | 74 (15.7)   | 0.021   |
| HIV (%)                         | 26 (2.5)      | 11 (2.3)    | 0.966   |
| Organ transplant (%)            | 31 (3.0)      | 18 (3.8)    | 0.509   |
| Frailty (%)                     | 108 (10.5)    | 76 (16.1)   | 0.003   |
| Hypoxia (%)                     | 491 (47.6)    | 237 (50.2)  | 0.381   |

Abbreviations: BMI: Body mass index, HIV: Human Immunodeficiency Virus.

## Discussion

1  
2 Our data from a large, multi-site healthcare institution in one of the worst affected regions  
3  
4 internationally provides a large dataset for in-depth comparison; for instance we report a similar  
5  
6 number of cases as reported from a national observational cohort study from Japan [18]. Our  
7  
8 hospitalised cohort shares similar demographics to other city populations in the UK, representative  
9  
10 of London with around 40% of individuals from non-White ethnicities [19]. This compares to national  
11  
12 population studies where the average age of cases was much lower and with lower proportion from  
13  
14 non-White ethnicities [8,20].  
15  
16

17  
18  
19  
20 There were threefold more SARS-CoV-2 RNA positive cases reported by the hospital laboratory in  
21  
22 wave two. Partly this is attributed to increased testing capacity and changing testing strategy  
23  
24 throughout 2020 (Supplementary Figure 1). Due to capacity limits, during wave one it was not local  
25  
26 policy to offer testing to outpatients and those not requiring admission, instead relying on clinical  
27  
28 diagnosis. Healthcare workers were not offered occupational health testing until the end of wave  
29  
30 one. We therefore restricted comparison to inpatient and nosocomial cases.  
31  
32  
33

34  
35  
36 There were almost twice as many admitted cases in wave two compared with wave one (1503 v  
37  
38 838). This is consistent with a higher local community incidence as reported by the ONS infection  
39  
40 survey with 3.5% of individuals in London infected in January 2021 [21], compared with 2.2% of  
41  
42 individuals in London at the peak of wave one [1]. The increase in peak hospital occupancy in wave  
43  
44 two has also been reported nationally [22]. A major contributor to this increase in hospital  
45  
46 admissions is likely to be the emergence of the Alpha variant, which is reported to be more  
47  
48 transmissible [7].  
49  
50  
51

52  
53  
54  
55 Our finding is the first study in hospitalised cohorts to show increased severity of disease with the  
56  
57 Alpha variant, as defined by hypoxia on admission which is equivalent to WHO ordinal scale of  $\geq 4$   
58  
59 [12] and a key marker of severe disease. Hypoxia on admission was chosen as a marker of severity  
60

1  
2  
3  
4  
5  
6  
7  
8  
9  
10  
11  
12  
13  
14  
15  
16  
17  
18  
19  
20  
21  
22  
23  
24  
25  
26  
27  
28  
29  
30  
31  
32  
33  
34  
35  
36  
37  
38  
39  
40  
41  
42  
43  
44  
45  
46  
47  
48  
49  
50  
51  
52  
53  
54  
55  
56  
57  
58  
59  
60

to prevent confounding of results by changes in management of hospitalised patients across the pandemic. For instance treatment steroids, which were introduced during the study period around November 2020, have been shown to reduce risk of ventilation and death [23]. Other changes in management, such as proning, anticoagulation and tocilizumab could also confound the outcomes of death and ICU admission. Hypoxia on admission is not at risk of confounding by changes in management of cases, as currently no significant management or treatment options are deployed in the community. The validity of using hypoxia as a marker of severity is shown by the clinical characteristics of SARS-COV-2, with respiratory illness causing hypoxia in a minority of cases and with a smaller proportion having respiratory failure necessitating ventilation [24].

Our finding of increased virulence with the Alpha variant is consistent with that reported in community studies, which show increased hospitalisation [20] and mortality [8]. Notably however, these community studies failed to control for comorbidities [Keogh]. The association with severity we find persists even after adjustment for age, sex, and comorbidities. Moreover, testing in the first wave prior to emergence of the Alpha variant was strict due to limited testing capacity, potentially leading to an ascertainment bias towards more severe cases in the first wave. This makes it even more striking that the association of the Alpha variant with severe disease is so prominent.

Notably the only other published study in hospital cohorts showed no difference in severity as measured by the composite outcome of need for ventilation or death [10]. Broadly the two cohorts from these hospital cohorts are similar, with an average age of around 60 and a high proportion of non-white ethnicities. In general this supports the external validity of our findings, however replication in dissimilar cohorts are awaited. The difference between findings in our study and those of [10] may be related to the choice of outcome. Our choice of outcome, hypoxia on admission, represents the natural history of disease prior to medical intervention as no treatments are currently deployed in the community. The mortality outcome investigated by Frampton *et al*, is after hospital treatment which may ameliorate the severity that we find with the alpha variant, thereby explaining the differences in severity seen between our studies. Interestingly, despite male sex being widely



1 reported to be a risk factor for severe disease our multivariate model confirms findings by these  
2 authors that sex is not significantly associated with severity in hospitalised cohorts after adjusted  
3  
4 analysis.  
5  
6  
7

8  
9 The lack of association between severity and male sex may corresponds to the increase in the  
10 proportion of females in the admitted cohort of wave two and those infected with Alpha, accounting  
11 for an extra 5% of admissions with SARS-CoV-2 infection. A study in press [25] suggests the Alpha  
12  
13 variant may be more severe in hospitalised females, who may have increased mortality and/or  
14  
15 requirement for ICU care. Our data, showing an increase in the proportion of females in the  
16  
17 admission cohort and lack of expected association of severity with male sex is consistent with the  
18  
19 finding that Alpha may show increased virulence in females.  
20  
21  
22  
23  
24  
25

26  
27 We also included an assessment of bias by comparing characteristics of non-sequenced cases with  
28  
29 those successfully sequenced. Whilst sequenced patients were older and more comorbid there was  
30  
31 no significant difference between the proportion with the outcome measure of hypoxia on admission  
32  
33 between our sequenced and non-sequenced cases. This suggests no significant bias towards  
34  
35 severity in the sequenced group, which was predominantly made up of cases of the Alpha variant.  
36  
37  
38  
39  
40

41 Admitted cases in wave two were also around half as likely to have a diagnosis of frailty, which may  
42  
43 be due to fewer admissions from care homes during wave two, which has been reported both  
44  
45 nationally [26] and internationally [27]. Additionally, admitted cases were around a third less likely to  
46  
47 have cancer in wave two. Both of these reductions may also be as a result of individuals shielding,  
48  
49 and therefore at reduced risk for acquiring SARS-CoV-2 infection. Other differences in comorbidities  
50  
51 between waves were small and of unclear clinical significance.  
52  
53  
54  
55

56  
57 One additional striking observation was the similarity in number of nosocomial cases in wave one  
58  
59 (n=96 of 934 [10%] inpatient cases) and wave two (n=137 of 1640 [8%] inpatient cases). This  
60  
incidence of nosocomial infection is a major challenge for UK healthcare institutions, with associated

1  
2  
3  
4  
5  
6  
7  
8  
9  
10  
11  
12  
13  
14  
15  
16  
17  
18  
19  
20  
21  
22  
23  
24  
25  
26  
27  
28  
29  
30  
31  
32  
33  
34  
35  
36  
37  
38  
39  
40  
41  
42  
43  
44  
45  
46  
47  
48  
49  
50  
51  
52  
53  
54  
55  
56  
57  
58  
59  
60

crude mortality at around 30% during the first wave [28,29]. Interestingly, nosocomial cases in wave one increased and started to fall before impact of the main infection control interventions of banning hospital visitors (March 25th), introducing universal surgical mask wearing (28th March 2020) and universal regular inpatient screening (after the first wave). In comparison, all these measures were in place prior to the second wave. The similar number of cases in wave two may in part be due to increased inpatient screening, which would identify asymptomatic cases, or introduction of the more transmissible Alpha variant which made up the vast majority of our sequenced nosocomial cases.

Some healthcare institutions report far fewer nosocomial acquisitions; for instance an academic hospital in Boston, USA reported only 2 nosocomial cases in over 9000 admissions [30]. This could be due to greater availability of side rooms for isolation or their use of N95 masks by HCWs, which may decrease transmission between HCWs and patients. In contrast, current UK public health policy recommends surgical facemasks for patient interactions unless performing aerosol generating procedures [31]. For this reason it will be important to further investigate the factors involved in nosocomial acquisition in both waves.

Our study is limited by studying a population comes from one city and therefore needs to be compared with findings in other regions. Our dataset included cases confirmed by SARS-CoV-2 RNA testing in our laboratory, so may miss those diagnosed only clinically. A follow-up study is needed to assess the effect of the Alpha variant on mortality, when the wave two cohort has completed hospital stay. We could not compare outcomes after hospital admission, such as ICU admission or mortality, due to changes in in-hospital management between waves. In addition, we were unable to include some variables associated with severity in other studies due to few cases with these features (e.g. pregnancy) or due to poor coding in the dataset (e.g. liver disease), which prevents us from commenting on the risk associated with these variables.

The number of cases diagnosed, admissions and nosocomial cases were higher in wave two than wave one, likely due to the increased incidence caused by the more transmissible Alpha variant.

1 Infection with the Alpha variant was associated with severity as measured by hypoxia on admission,  
2 the first such finding in hospitalised cohorts. Our findings support growing evidence that emerging  
3 variants may have altered virulence as well as increased transmissibility, with such evidence  
4 providing support for public health efforts to contain their spread. More broadly, it also increases  
5 understanding of the emergence of novel pathogens as they adapt to human hosts.  
6  
7  
8  
9  
10  
11  
12  
13  
14  
15  
16  
17  
18  
19  
20  
21  
22  
23  
24  
25  
26  
27  
28  
29  
30  
31  
32  
33  
34  
35  
36  
37  
38  
39  
40  
41  
42  
43  
44  
45  
46  
47  
48  
49  
50  
51  
52  
53  
54  
55  
56  
57  
58  
59  
60

For peer review only

## Contributions

LBS and WW were involved in the conceptualization, methodology, formal analysis of the synthesised data and writing (original drafting, review, and editing). TC, AA-M and GN were involved in investigation being responsible for whole genome sequencing and analysis of results. RB, FH and LdJ were involved in resources, administration and data curation. YW, JE, VC were involved in supervision, funding acquisition and drafting (review and editing). All authors agreed the final manuscript.

## References

- 1 Edelstein M, Obi C, Chand M, *et al*. SARS-CoV-2 infection in London, England: changes to community point prevalence around lockdown time, March–May 2020. *J Epidemiol Community Health* Published Online First: 1 October 2020. doi:10.1136/jech-2020-214730
- 2 Official UK Coronavirus Dashboard. <https://coronavirus.data.gov.uk/details/healthcare> (accessed 1 Mar 2021).
- 3 Kirby T. New variant of SARS-CoV-2 in UK causes surge of COVID-19. *Lancet Respir Med* 2021;**9**:e20–1. doi:10.1016/S2213-2600(21)00005-9
- 4 Preliminary genomic characterisation of an emergent SARS-CoV-2 lineage in the UK defined by a novel set of spike mutations. 2020.<https://virological.org/t/preliminary-genomic-characterisation-of-an-emergent-sars-cov-2-lineage-in-the-uk-defined-by-a-novel-set-of-spike-mutations/563> (accessed 24 Jan 2021).
- 5 Sparrow A, Carroll R, Pidd H. UK Covid: Boris Johnson says ‘great strides’ made with vaccinations but many are yet to be reached – as it happened. The Guardian. 2021.<http://www.theguardian.com/politics/live/2021/feb/10/uk-covid-news-shapps-summer-holidays-abroad-travel-coronavirus-vaccine-live-latest-updates> (accessed 1 Mar 2021).
- 6 Chand M, Others. Investigation of novel SARS-COV-2 variant: Variant of Concern 202012/01 (PDF). *Public Health England PHE* 2020.
- 7 Volz E, Mishra S, Chand M, *et al*. Transmission of SARS-CoV-2 Lineage B.1.1.7 in England: Insights from linking epidemiological and genetic data. doi:10.1101/2020.12.30.20249034
- 8 Davies NG, Jarvis CI, John Edmunds W, *et al*. Increased mortality in community-tested cases of SARS-CoV-2 lineage B.1.1.7. *Nature* 2021;**593**:270–4. doi:10.1038/s41586-021-03426-1
- 9 Challen R, Brooks-Pollock E, Read JM, *et al*. Risk of mortality in patients infected with SARS-CoV-2 variant of concern 202012/1: matched cohort study. *BMJ* 2021;**372**. doi:10.1136/bmj.n579
- 10 Frampton D, Rampling T, Cross A, *et al*. Genomic characteristics and clinical effect of the emergent SARS-CoV-2 B.1.1.7 lineage in London, UK: a whole-genome sequencing and hospital-based cohort study. *Lancet Infect Dis* Published Online First: 12 April 2021. doi:10.1016/S1473-3099(21)00170-5

- 11 Surveillance definitions for COVID-19. <https://www.ecdc.europa.eu/en/covid-19/surveillance/surveillance-definitions> (accessed 24 Jan 2021).
- 12 Print RB. COVID-19 Therapeutic Trial Synopsis. 2020. <https://www.who.int/publications/i/item/covid-19-therapeutic-trial-synopsis> (accessed 8 Aug 2021).
- 13 Quick J. nCoV-2019 sequencing protocol v1 (protocols.io.bbmuik6w). protocols.io. 2020. doi:10.17504/protocols.io.bbmuik6w
- 14 Artic Network. <https://artic.network/ncov-2019/ncov2019-bioinformatics-sop.html> (accessed 24 Jan 2021).
- 15 *pangolin*. Github <https://github.com/cov-lineages/pangolin> (accessed 24 Jan 2021).
- 16 Rambaut A, Loman N, Pybus O, *et al*. C.-19 GC UK, Preliminary genomic characterisation of an emergent SARS-CoV-2 lineage in the UK defined by a novel set of spike mutations. virological. org (2020).
- 17 e-research. Acknowledging - Rosalind research computing infrastructure. <https://rosalind.kcl.ac.uk/acknowledging/> (accessed 6 Mar 2021).
- 18 Saito S, Asai Y, Matsunaga N, *et al*. First and second COVID-19 waves in Japan: A comparison of disease severity and characteristics. *Journal of Infection*. 2020. doi:10.1016/j.jinf.2020.10.033
- 19 White E. Ethnicity and National Identity in England and Wales - Office for National Statistics. 2012. <https://www.ons.gov.uk/peoplepopulationandcommunity/culturalidentity/ethnicity/articles/ethnicityandnationalidentityinenglandandwales/2012-12-11> (accessed 18 Jun 2021).
- 20 Nyberg T, Twohig KA, Harris RJ, *et al*. Risk of hospital admission for patients with SARS-CoV-2 variant B.1.1.7: cohort analysis. *BMJ* 2021;**373**. doi:10.1136/bmj.n1412
- 21 Kara Steel And. Coronavirus (COVID-19) Infection Survey, UK - Office for National Statistics. 2021. <https://www.ons.gov.uk/peoplepopulationandcommunity/healthandsocialcare/conditionsanddiseases/bulletins/coronaviruscovid19infectionsurveysurvey/8january2021> (accessed 1 Feb 2021).
- 22 England NHS. NHS England » Hospitals admit one third of COVID patients in a single month. <https://www.england.nhs.uk/2021/02/hospitals-admit-one-third-of-covid-patients-in-a-single-month/> (accessed 1 Mar 2021).
- 23 RECOVERY Collaborative Group, Horby P, Lim WS, *et al*. Dexamethasone in Hospitalized Patients with Covid-19 - Preliminary Report. *N Engl J Med* Published Online First: 17 July 2020. doi:10.1056/NEJMoa2021436
- 24 Wu Z, McGoogan JM. Characteristics of and important lessons from the coronavirus disease 2019 (COVID-19) outbreak in China: summary of a report of 72 314 cases from the Chinese Center for Disease Control and Prevention. *JAMA* 2020;**323**:1239–42. <https://jamanetwork.com/journals/jama/article-abstract/2762130>
- 25 Stirrup OT, Boshier FAT, Venturini C, *et al*. SARS-CoV-2 lineage B.1.1.7 is associated with greater disease severity among hospitalised women but not men. medRxiv; 2021. DOI: 10.1101/2021.06.24.21259107.
- 26 John S. Deaths involving COVID-19 in the care sector, England and Wales - Office for National Statistics. 2020. <https://www.ons.gov.uk/peoplepopulationandcommunity/birthsdeathsandmarriages/deat>

hs/articles/deathsinvolvingcovid19inthecaresectorenglandandwales/deathsoccurringupto12june2020andregisteredupto20june2020provisional (accessed 25 Feb 2021).

- 27 Ioannidis JPA, Axfors C, Contopoulos-Ioannidis DG. Second versus first wave of COVID-19 deaths: shifts in age distribution and in nursing home fatalities. *medRxiv* 2020;:2020.11.28.20240366. doi:10.1101/2020.11.28.20240366
- 28 Carter B, Collins JT, Barlow-Pay F, *et al*. Nosocomial COVID-19 infection: examining the risk of mortality. The COPE-Nosocomial Study (COVID in Older PEople). *J Hosp Infect* 2020;**106**:376–84. doi:10.1016/j.jhin.2020.07.013
- 29 Snell LB, Fisher CL, Taj U, Stirrup O, Merrick B, Alcolea-Medina A, Charalampous T, Signell AW, Wilson HD, Betancor G, Kia Ik MT, Cunningham E, Cliff PR, Pickering S, Galao RP, Batra R, Neil SJD, Malim MH, Doores KJ, Douthwaite ST, Nebbia G; COVID-19 Genomics UK (COG-UK) consortium. Combined epidemiological and genomic analysis of nosocomial SARS-CoV-2 infection early in the pandemic and the role of unidentified cases in transmission. *Clin Microbiol Infect*. 2021 Aug 13:S1198-743X(21)00435-3. doi: 10.1016/j.cmi.2021.07.040. Epub ahead of print
- 30 Rhee C, Baker M, Vaidya V, *et al*. Incidence of Nosocomial COVID-19 in Patients Hospitalized at a Large US Academic Medical Center. *JAMA Netw Open* 2020;**3**:e2020498. doi:10.1001/jamanetworkopen.2020.20498
31. Public Health England. COVID-19: infection prevention and control (IPC). GOV.UK; 10 Jan 2020 [cited 15 Mar 2021]. Available: <https://www.gov.uk/government/publications/wuhan-novel-coronavirus-infection-prevention-and-control>

1  
2  
3  
4  
5  
6  
7  
8  
9  
10  
11  
12  
13  
14  
15  
16  
17  
18  
19  
20  
21  
22  
23  
24  
25  
26  
27  
28  
29  
30  
31  
32  
33  
34  
35  
36  
37  
38  
39  
40  
41  
42  
43  
44  
45  
46  
47  
48  
49  
50  
51  
52  
53  
54  
55  
56  
57  
58  
59  
60

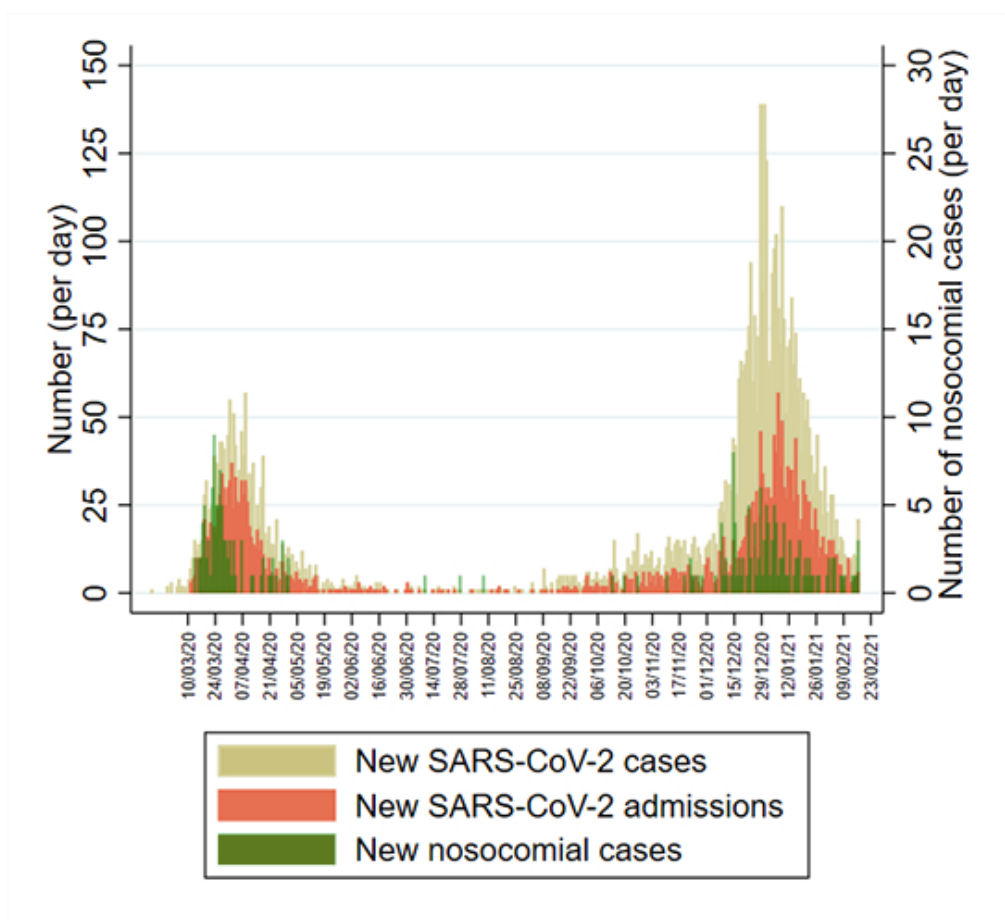

Distribution of laboratory confirmed SARS-CoV-2 cases over time. Daily incidence of new cases (beige), newly admitted cases (orange) and nosocomial acquisitions (green) over time.

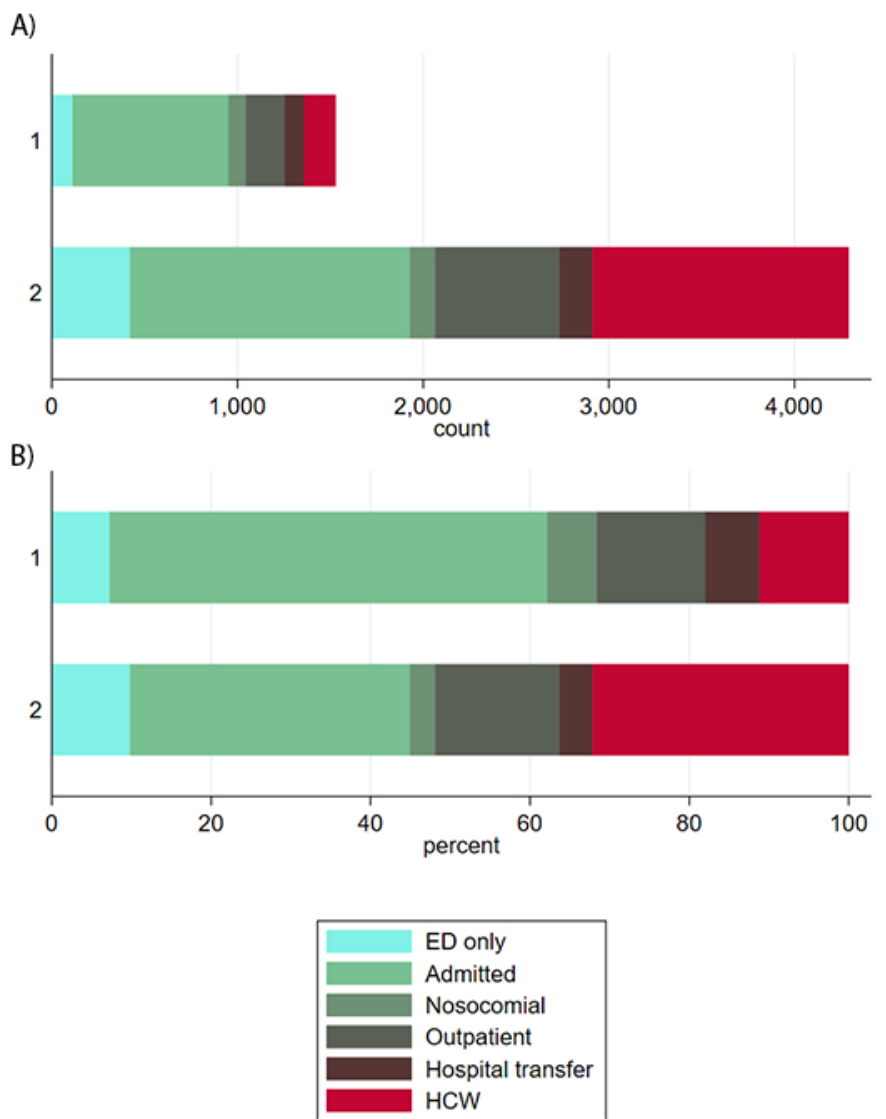

(A) Absolute number of cases within the different hospital cohorts during wave one (upper) and wave two (lower). (B) Proportion of cases within the different hospital cohorts during wave one (upper) and wave two (lower).



1  
2  
3  
4  
5  
6  
7  
8  
9  
10  
11  
12  
13  
14  
15  
16  
17  
18  
19  
20  
21  
22  
23  
24  
25  
26  
27  
28  
29  
30  
31  
32  
33  
34  
35  
36  
37  
38  
39  
40  
41  
42  
43  
44  
45  
46  
47  
48  
49  
50  
51  
52  
53  
54  
55  
56  
57  
58  
59  
60

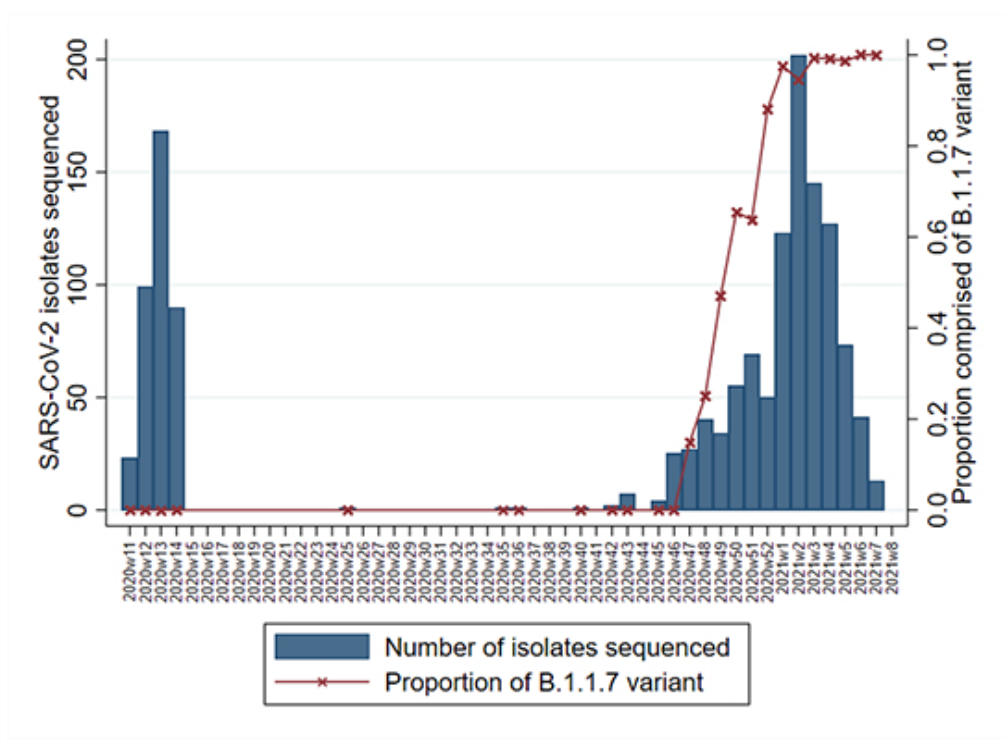

Number of cases with sequenced SARS-CoV-2 isolates by epi-week (bar) and the proportion of which were made up of the alpha variant B.1.1.7 (red line)

190x138mm (72 x 72 DPI)

## Supplementary Material

### Risk factors for severe disease from COVID-19 - literature review

| Risk factor               | References     | Comment on inclusion in multivariable model                                                                                                        |
|---------------------------|----------------|----------------------------------------------------------------------------------------------------------------------------------------------------|
| Age                       | [1–5]          | Included as a continuous variable.                                                                                                                 |
| Sex                       | [2,5]          | Included as binary variable.                                                                                                                       |
| Co-morbidities            |                |                                                                                                                                                    |
| 1. Cancer                 | 1. [2,3,5–7]   | 1. Included                                                                                                                                        |
| 2. Chronic kidney disease | 2. [2,4,6]     | 2. Included                                                                                                                                        |
| 3. Chronic lung disease   | 3. [2,3,5,6]   | 3. Included                                                                                                                                        |
| 4. Dementia               | 4. [5,6]       | 4. Poorly coded in our dataset so not included.                                                                                                    |
| 5. Diabetes               | 5. [2,3,6]     | 5. Included                                                                                                                                        |
| 6. Cardiac disease        | 6. [2,4–6]     | 6. Included                                                                                                                                        |
| 7. HIV                    | 7. [6,8]       | 7. Included                                                                                                                                        |
| 8. Immunocompromise       | 8. [2,6]       | 8. Poorly coded in our dataset so not included.                                                                                                    |
| 9. Liver disease          | 9. [2,5,6]     | 9. Poorly coded in our dataset so not included                                                                                                     |
| 10. Obesity               | 10. [4,6,9–11] | 10. Included                                                                                                                                       |
| 11. Pregnancy             | 11. [6,12]     | 11. Small number of pregnant individuals in our dataset so not included                                                                            |
| 12. Transplant            | 12. [2,6]      | 12. Included                                                                                                                                       |
| 13. Stroke                | 13. [2,6]      | 12. Included                                                                                                                                       |
| 14. Frailty               | 14. [13–15]    | 13. Included with cardiovascular disease                                                                                                           |
| Ethnicity                 | [2,5,16,17]    | Evidence suggests individuals of non-White ethnicities are at increased risk in multiple territories. Included as categorical variable.            |
| Socioeconomic background  | [18,19]        | These data suggest risk posed by certain ethnicity may be related to socioeconomic background. For simplicity we included only ethnicity variable. |
| Variant status            | [20–22]        | Alpha variant associated with increased mortality in population level studies, but not in single hospitalised study (full discussion in main text) |

## REFERENCES

- Richardson S, Hirsch JS, Narasimhan M, *et al.* Presenting Characteristics, Comorbidities, and Outcomes Among 5700 Patients Hospitalized With COVID-19 in the New York City Area. *JAMA* 2020;**323**:2052–9.
- Williamson EJ, Walker AJ, Bhaskaran K, *et al.* Factors associated with COVID-19-related death using OpenSAFELY. *Nature* 2020;**584**:430–6.
- Wu Z, McGoogan JM. Characteristics of and Important Lessons From the Coronavirus Disease 2019 (COVID-19) Outbreak in China: Summary of a Report of 72 314 Cases From the Chinese Center for Disease Control and Prevention. *JAMA* 2020;**323**:1239–42.
- Petrilli CM, Jones SA, Yang J, *et al.* Factors associated with hospital admission and critical illness among 5279 people with coronavirus disease 2019 in New York City: prospective cohort study. *BMJ* 2020;**369**:m1966.
- Harrison SL, Fazio-Eynullayeva E, Lane DA, *et al.* Comorbidities associated with mortality in 31,461 adults with COVID-19 in the United States: A federated electronic medical record analysis. *PLoS Med* 2020;**17**:e1003321.
- Know WYNT. People with Certain Medical Conditions. <https://www.cdc.gov/coronavirus/2019-ncov/need->

- extra-precautions/people-with-medical-conditions.html
- 7 Dai M, Liu D, Liu M, *et al.* Patients with Cancer Appear More Vulnerable to SARS-CoV-2: A Multicenter Study during the COVID-19 Outbreak. *Cancer Discov* 2020;**10**:783–91.
  - 8 Geretti AM, Stockdale AJ, Kelly SH, *et al.* Outcomes of COVID-19 related hospitalization among people with HIV in the ISARIC WHO Clinical Characterization Protocol (UK): a prospective observational study. *Clin Infect Dis* Published Online First: 23 October 2020. doi:10.1093/cid/ciaa1605
  - 9 Lighter J, Phillips M, Hochman S, *et al.* Obesity in Patients Younger Than 60 Years Is a Risk Factor for COVID-19 Hospital Admission. *Clin Infect Dis* 2020;**71**:896–7.
  - 10 Tartof SY, Qian L, Hong V, *et al.* Obesity and Mortality Among Patients Diagnosed With COVID-19: Results From an Integrated Health Care Organization. *Ann Intern Med* 2020;**173**:773–81.
  - 11 Kompaniyets L, Goodman AB, Belay B, *et al.* Body Mass Index and Risk for COVID-19-Related Hospitalization, Intensive Care Unit Admission, Invasive Mechanical Ventilation, and Death - United States, March-December 2020. *MMWR Morb Mortal Wkly Rep* 2021;**70**:355–61.
  - 12 Allotey J, Stallings E, Bonet M, *et al.* Clinical manifestations, risk factors, and maternal and perinatal outcomes of coronavirus disease 2019 in pregnancy: living systematic review and meta-analysis. *BMJ* 2020;**370**:m3320.
  - 13 Dumitrascu F, Branje KE, Hladkiewicz ES, *et al.* Association of frailty with outcomes in individuals with COVID-19: A living review and meta-analysis. *J Am Geriatr Soc* 2021;**69**:2419–29.
  - 14 Kastora S, Kounidas G, Perrott S, *et al.* Clinical frailty scale as a point of care prognostic indicator of mortality in COVID-19: a systematic review and meta-analysis. *EClinicalMedicine* 2021;**36**:100896.
  - 15 Yang Y, Luo K, Jiang Y, *et al.* The Impact of Frailty on COVID-19 Outcomes: A Systematic Review and Meta-analysis of 16 Cohort Studies. *J Nutr Health Aging* 2021;**25**:702–9.
  - 16 Price-Haywood EG, Burton J, Fort D, *et al.* Hospitalization and Mortality among Black Patients and White Patients with Covid-19. *N Engl J Med* 2020;**382**:2534–43.
  - 17 Gold JAW, Rossen LM, Ahmad FB, *et al.* Race, Ethnicity, and Age Trends in Persons Who Died from COVID-19 - United States, May-August 2020. *MMWR Morb Mortal Wkly Rep* 2020;**69**:1517–21.
  - 18 Kabarriti R, Brodin NP, Maron MI, *et al.* Association of Race and Ethnicity With Comorbidities and Survival Among Patients With COVID-19 at an Urban Medical Center in New York. *JAMA Netw Open* 2020;**3**:e2019795.
  - 19 Muñoz-Price LS, Nattinger AB, Rivera F, *et al.* Racial Disparities in Incidence and Outcomes Among Patients With COVID-19. *JAMA Netw Open* 2020;**3**:e2021892.
  - 20 Davies NG, Jarvis CI, CMMID COVID-19 Working Group, *et al.* Increased mortality in community-tested cases of SARS-CoV-2 lineage B.1.1.7. *Nature* 2021;**593**:270–4.
  - 21 Frampton D, Rampling T, Cross A, *et al.* Genomic characteristics and clinical effect of the emergent SARS-CoV-2 B.1.1.7 lineage in London, UK: a whole-genome sequencing and hospital-based cohort study. *Lancet Infect Dis* Published Online First: 12 April 2021. doi:10.1016/S1473-3099(21)00170-5
  - 22 Challen R, Brooks-Pollock E, Read JM, *et al.* Risk of mortality in patients infected with SARS-CoV-2 variant of concern 202012/1: matched cohort study. *BMJ* 2021;**372**:n579.

1  
2  
3  
4  
5  
6  
7  
8  
9  
10  
11  
12  
13  
14  
15  
16  
17  
18  
19  
20  
21  
22  
23  
24  
25  
26  
27  
28  
29  
30  
31  
32  
33  
34  
35  
36  
37  
38  
39  
40  
41  
42  
43  
44  
45  
46  
47  
48  
49  
50  
51  
52  
53  
54  
55  
56  
57  
58  
59  
60

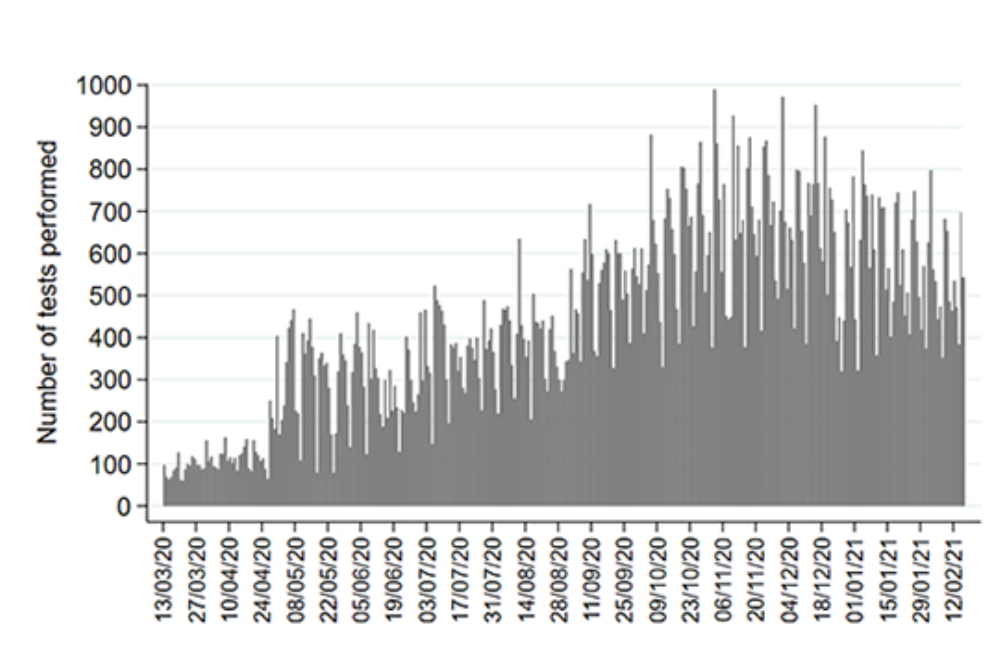

Our laboratory began testing on 13th March 2020 with initial capacity for around 150 PCR tests per day, before increasing to around 500 tests per day in late April during wave one, and up to 1000 tests per day during wave two

190x125mm (72 x 72 DPI)

**STROBE 2007 (v4) Statement—Checklist of items that should be included in reports of cohort studies**

| Section/Topic             | Item # | Recommendation                                                                                                                                                                       | Reported on page # |
|---------------------------|--------|--------------------------------------------------------------------------------------------------------------------------------------------------------------------------------------|--------------------|
| <b>Title and abstract</b> | 1      | (a) Indicate the study’s design with a commonly used term in the title or the abstract                                                                                               | 2                  |
|                           |        | (b) Provide in the abstract an informative and balanced summary of what was done and what was found                                                                                  | 2                  |
| <b>Introduction</b>       |        |                                                                                                                                                                                      |                    |
| Background/rationale      | 2      | Explain the scientific background and rationale for the investigation being reported                                                                                                 | 6                  |
| Objectives                | 3      | State specific objectives, including any prespecified hypotheses                                                                                                                     | 6                  |
| <b>Methods</b>            |        |                                                                                                                                                                                      |                    |
| Study design              | 4      | Present key elements of study design early in the paper                                                                                                                              | 7-9                |
| Setting                   | 5      | Describe the setting, locations, and relevant dates, including periods of recruitment, exposure, follow-up, and data collection                                                      | 7-9                |
| Participants              | 6      | (a) Give the eligibility criteria, and the sources and methods of selection of participants. Describe methods of follow-up                                                           | 8                  |
|                           |        | (b) For matched studies, give matching criteria and number of exposed and unexposed                                                                                                  | NA                 |
| Variables                 | 7      | Clearly define all outcomes, exposures, predictors, potential confounders, and effect modifiers. Give diagnostic criteria, if applicable                                             | 7-9                |
| Data sources/ measurement | 8*     | For each variable of interest, give sources of data and details of methods of assessment (measurement). Describe comparability of assessment methods if there is more than one group | 8-9                |
| Bias                      | 9      | Describe any efforts to address potential sources of bias                                                                                                                            | 15                 |
| Study size                | 10     | Explain how the study size was arrived at                                                                                                                                            | 12                 |
| Quantitative variables    | 11     | Explain how quantitative variables were handled in the analyses. If applicable, describe which groupings were chosen and why                                                         | 8-9                |
| Statistical methods       | 12     | (a) Describe all statistical methods, including those used to control for confounding                                                                                                | 9-10               |
|                           |        | (b) Describe any methods used to examine subgroups and interactions                                                                                                                  | NA                 |
|                           |        | (c) Explain how missing data were addressed                                                                                                                                          | 9                  |
|                           |        | (d) If applicable, explain how loss to follow-up was addressed                                                                                                                       | NA                 |
|                           |        | (e) Describe any sensitivity analyses                                                                                                                                                | NA                 |
| <b>Results</b>            |        |                                                                                                                                                                                      |                    |

|                          |     |                                                                                                                                                                                                                                                                                                                                                                                                               |                                |
|--------------------------|-----|---------------------------------------------------------------------------------------------------------------------------------------------------------------------------------------------------------------------------------------------------------------------------------------------------------------------------------------------------------------------------------------------------------------|--------------------------------|
| Participants             | 13* | (a) Report numbers of individuals at each stage of study—eg numbers potentially eligible, examined for eligibility, confirmed eligible, included in the study, completing follow-up, and analysed<br>(b) Give reasons for non-participation at each stage<br>(c) Consider use of a flow diagram                                                                                                               | 10-12<br>15<br>Not done        |
| Descriptive data         | 14* | (a) Give characteristics of study participants (eg demographic, clinical, social) and information on exposures and potential confounders<br>(b) Indicate number of participants with missing data for each variable of interest<br>(c) Summarise follow-up time (eg, average and total amount)                                                                                                                | 15-18<br>In tables<br>NA       |
| Outcome data             | 15* | Report numbers of outcome events or summary measures over time                                                                                                                                                                                                                                                                                                                                                | Page 18<br>Table 1, Table 2    |
| Main results             | 16  | (a) Give unadjusted estimates and, if applicable, confounder-adjusted estimates and their precision (eg, 95% confidence interval). Make clear which confounders were adjusted for and why they were included<br>(b) Report category boundaries when continuous variables were categorized<br>(c) If relevant, consider translating estimates of relative risk into absolute risk for a meaningful time period | 12-18<br>Table 1,2<br>NA<br>NA |
| Other analyses           | 17  | Report other analyses done—eg analyses of subgroups and interactions, and sensitivity analyses                                                                                                                                                                                                                                                                                                                | None performed                 |
| <b>Discussion</b>        |     |                                                                                                                                                                                                                                                                                                                                                                                                               |                                |
| Key results              | 18  | Summarise key results with reference to study objectives                                                                                                                                                                                                                                                                                                                                                      | 22                             |
| <b>Limitations</b>       |     |                                                                                                                                                                                                                                                                                                                                                                                                               |                                |
| Interpretation           | 20  | Give a cautious overall interpretation of results considering objectives, limitations, multiplicity of analyses, results from similar studies, and other relevant evidence                                                                                                                                                                                                                                    | 22-23                          |
| Generalisability         | 21  | Discuss the generalisability (external validity) of the study results                                                                                                                                                                                                                                                                                                                                         | 23                             |
| <b>Other information</b> |     |                                                                                                                                                                                                                                                                                                                                                                                                               |                                |
| Funding                  | 22  | Give the source of funding and the role of the funders for the present study and, if applicable, for the original study on which the present article is based                                                                                                                                                                                                                                                 | 4                              |

\*Give information separately for cases and controls in case-control studies and, if applicable, for exposed and unexposed groups in cohort and cross-sectional studies.

**Note:** An Explanation and Elaboration article discusses each checklist item and gives methodological background and published examples of transparent reporting. The STROBE checklist is best used in conjunction with this article (freely available on the Web sites of PLoS Medicine at <http://www.plosmedicine.org/>, Annals of Internal Medicine at <http://www.annals.org/>, and Epidemiology at <http://www.epidem.com/>). Information on the STROBE Initiative is available at [www.strobe-statement.org](http://www.strobe-statement.org).

# BMJ Open

**A descriptive comparison of admission characteristics between pandemic waves and multivariable analysis of the association of the Alpha variant (B.1.1.7 lineage) of SARS-CoV-2 with disease severity in inner London.**

|                                 |                                                                                                                                                                                                                                                                                                                                                                                                                                                                                                                                                                                                                                                                                                          |
|---------------------------------|----------------------------------------------------------------------------------------------------------------------------------------------------------------------------------------------------------------------------------------------------------------------------------------------------------------------------------------------------------------------------------------------------------------------------------------------------------------------------------------------------------------------------------------------------------------------------------------------------------------------------------------------------------------------------------------------------------|
| Journal:                        | <i>BMJ Open</i>                                                                                                                                                                                                                                                                                                                                                                                                                                                                                                                                                                                                                                                                                          |
| Manuscript ID                   | bmjopen-2021-055474.R2                                                                                                                                                                                                                                                                                                                                                                                                                                                                                                                                                                                                                                                                                   |
| Article Type:                   | Original research                                                                                                                                                                                                                                                                                                                                                                                                                                                                                                                                                                                                                                                                                        |
| Date Submitted by the Author:   | 07-Oct-2021                                                                                                                                                                                                                                                                                                                                                                                                                                                                                                                                                                                                                                                                                              |
| Complete List of Authors:       | Snell, Luke; King's College London; Guy's and St Thomas' NHS Foundation Trust<br>Wang , Wenjuan; King's College London<br>Medina, Adela; Viapath; King's College London<br>Charalampous, Themoula; King's College London<br>Batra, Rahul; King's College London<br>de Jongh, Leonardo; Guy's and St Thomas' NHS Foundation Trust<br>Higgins, Finola; Guy's and St Thomas' NHS Foundation Trust<br>Investigators, COG-UK HOCl ; Not applicable<br>Nebbia, Gaia; King's College London; Guy's and St Thomas' NHS Foundation Trust<br>Wang, Yanzhong; King's College London<br>Edgeworth, Jonathan; King's College London; Guy's and St Thomas' NHS Foundation Trust<br>Curcin, Vasa; King's College London |
| <b>Primary Subject Heading</b>: | Infectious diseases                                                                                                                                                                                                                                                                                                                                                                                                                                                                                                                                                                                                                                                                                      |
| Secondary Subject Heading:      | Epidemiology                                                                                                                                                                                                                                                                                                                                                                                                                                                                                                                                                                                                                                                                                             |
| Keywords:                       | VIROLOGY, EPIDEMIOLOGY, Epidemiology < INFECTIOUS DISEASES, Public health < INFECTIOUS DISEASES                                                                                                                                                                                                                                                                                                                                                                                                                                                                                                                                                                                                          |
|                                 |                                                                                                                                                                                                                                                                                                                                                                                                                                                                                                                                                                                                                                                                                                          |

SCHOLARONE™  
Manuscripts



I, the Submitting Author has the right to grant and does grant on behalf of all authors of the Work (as defined in the below author licence), an exclusive licence and/or a non-exclusive licence for contributions from authors who are: i) UK Crown employees; ii) where BMJ has agreed a CC-BY licence shall apply, and/or iii) in accordance with the terms applicable for US Federal Government officers or employees acting as part of their official duties; on a worldwide, perpetual, irrevocable, royalty-free basis to BMJ Publishing Group Ltd ("BMJ") its licensees and where the relevant Journal is co-owned by BMJ to the co-owners of the Journal, to publish the Work in this journal and any other BMJ products and to exploit all rights, as set out in our [licence](#).

The Submitting Author accepts and understands that any supply made under these terms is made by BMJ to the Submitting Author unless you are acting as an employee on behalf of your employer or a postgraduate student of an affiliated institution which is paying any applicable article publishing charge ("APC") for Open Access articles. Where the Submitting Author wishes to make the Work available on an Open Access basis (and intends to pay the relevant APC), the terms of reuse of such Open Access shall be governed by a Creative Commons licence – details of these licences and which [Creative Commons](#) licence will apply to this Work are set out in our licence referred to above.

Other than as permitted in any relevant BMJ Author's Self Archiving Policies, I confirm this Work has not been accepted for publication elsewhere, is not being considered for publication elsewhere and does not duplicate material already published. I confirm all authors consent to publication of this Work and authorise the granting of this licence.



1  
2  
3  
4  
5  
6  
7  
8  
9  
10  
11  
12  
13  
14  
15  
16  
17  
18  
19  
20  
21  
22  
23  
24  
25  
26  
27  
28  
29  
30  
31  
32  
33  
34  
35  
36  
37  
38  
39  
40  
41  
42  
43  
44  
45  
46  
47  
48  
49  
50  
51  
52  
53  
54  
55  
56  
57  
58  
59  
60

# A descriptive comparison of admission characteristics between pandemic waves and multivariable analysis of the association of the Alpha variant (B.1.1.7 lineage) of SARS-CoV-2 with disease severity in inner London.

Luke B. Snell MBBS\*, Wenjuan Wang PhD\*, Adela Alcolea-Medina MPhil, Themoula Charalampous PhD, ,  
Rahul Batra MD, Leonardo de Jongh, Finola Higgins, COG-UK HOCI Investigators†, Gaia Nebbia PhD,  
Yanzhong Wang PhD, Jonathan D. Edgeworth PhD#, Vasa Curcin PhD#

- 1 King's College London, London, UK (L.B. Snell, W. Wang, A. Alcolea-Medina, T. Charalampous, G. Nebbia, R. Batra, Y. Wang, J.D. Edgeworth, V Curin)
- 2 Guy's and St Thomas' NHS Foundation Trust, London, UK (L.B. Snell, G. Nebbia, R. Batra, L. de Jongh, F. Higgins, J.D. Edgeworth)
- 3 Viapath, St Thomas' Hospital, London, UK (A. Alcolea-Medina)

\* These first authors contributed equally

† Full list of investigator names and affiliations are given in the appendix.

# These authors were co-principal investigators

Corresponding author: Dr. Luke B Snell, St. Thomas' Hospital, Westminster Bridge Road, UK SE1 7EH, [luke.snell@nhs.net](mailto:luke.snell@nhs.net), 02071887188

**Running title:** Comparison of SARS-CoV-2 waves and alpha variant severity

**Article word count:** 3714

## Abstract

**Background.** The Alpha variant (B.1.1.7 lineage) of SARS-CoV-2 emerged and became the dominant circulating variant in the UK in late 2020. Current literature is unclear on whether the Alpha variant is associated with increased severity. We linked clinical data with viral genome sequence data to compare admitted cases between SARS-CoV-2 waves in London, and to investigate the association between Alpha variant and the severity of disease.

**Methods.** Clinical, demographic, laboratory and viral sequence data from electronic health record (EHR) systems was collected for all cases with a positive SARS-CoV-2 RNA test between March 13th 2020 and February 17th 2021 in a multi-site London healthcare institution. Multivariate analysis using logistic regression assessed risk factors for severity as defined by hypoxia at admission.

**Results** There were 5810 SARS-CoV-2 RNA positive cases of which 2341 were admitted (838 in wave one and 1503 in wave two). Both waves had a temporally aligned rise in nosocomial cases (96 in wave one, 137 in wave two). The Alpha variant was first identified on 15th November 2020 and increased rapidly to comprise 400/472 (85%) of sequenced isolates from admitted cases in wave two. A multivariate analysis identified risk factors for severity on admission, such as age (OR 1.02 [CI 1.01-1.03] for every year older,  $p < 0.001$ ), obesity (OR 1.70 [CI 1.28-2.26],  $p < 0.001$ ) and infection with the Alpha variant (OR 1.68 [CI 1.26-2.24],  $p < 0.001$ ).

**Conclusions** Our analysis is the first in hospitalised cohorts to show increased severity of disease associated with the Alpha variant. The number of nosocomial cases was similar in both waves despite the introduction of many infection control interventions before wave two.

Abstract word count: 250

## Strengths and limitations of this study

- Published evidence on whether the Alpha variant of SARS-CoV-2 causes more severe disease (COVID-19) is mixed.
- Our study benefits from a long study window, including patients since the beginning of the SARS-CoV-2 pandemic.
- Our outcome measure for severity, hypoxia on admission, reflects the natural history of disease prior to medical intervention and hospital treatment.
- Our analysis adjusts for comorbidities, a feature missing from many of the population-level studies currently published.

## Ethics

Ethical approval for data informatics was granted by The London Bromley Research Ethics Committee (reference (20/HRA/1871)) to the King's Health Partners Data Analytics and Modelling COVID-19 Group to collect clinically relevant data points from patients' electronic health records.

Whole genome sequencing of residual viral isolates was conducted under the COVID-19 Genomics UK (COG-UK) consortium study protocol, which was approved by the Public Health England Research Ethics and Governance Group (reference: R&D NR0195).

## Acknowledgements

The authors acknowledge use of the research computing facility at King's College London, Rosalind (<https://rosalind.kcl.ac.uk>), which is delivered in partnership with the National Institute for Health Research (NIHR) Biomedical Research Centres at South London & Maudsley and Guy's & St. Thomas' NHS Foundation Trusts, and part-funded by capital equipment grants from the Maudsley Charity (award 980) and Guy's & St. Thomas' Charity (TR130505). The views expressed are those of the author(s) and not necessarily those of the NHS, the NIHR, King's College London, or the Department of Health and Social Care.

## Funding

FH, LBS, YW, and VC are supported by the National Institute for Health Research (NIHR) Biomedical Research Centre programme of Infection and Immunity (RJ112/N027) based at Guy's and St Thomas' National Health Service NHS) Foundation Trust and King's College London.

This work was also supported by The Health Foundation and the Guy's and St Thomas' Charity.

COG-UK is supported by funding from the Medical Research Council (MRC) part of UK Research & Innovation (UKRI), the National Institute of Health Research (NIHR) and Genome Research Limited, operating as the Wellcome Sanger Institute.

1  
2 **Data sharing**  
3

4 Genomic data is publicly available on GISAID, please contact the authors for accession numbers.  
5

6 Our ethical approval precludes public sharing of patient-level data.  
7  
8  
9

10  
11 **Patient and public involvement**  
12

13 As this study was conducted to meet an urgent public health need, patient and public involvement  
14 was not sought  
15  
16  
17

18  
19  
20 **Competing interests**  
21

22 None to declare.  
23  
24  
25  
26  
27  
28  
29  
30  
31  
32  
33  
34  
35  
36  
37  
38  
39  
40  
41  
42  
43  
44  
45  
46  
47  
48  
49  
50  
51  
52  
53  
54  
55  
56  
57  
58  
59  
60

## Background

SARS-CoV-2 infection has led to the death of over 4 million individuals worldwide since its emergence in China during December 2019, with over 120,000 deaths reported in the UK as of July 2021. In London, the estimated incidence of new cases in the first wave peaked around March 23rd 2020 at 2.2% [1] and then rapidly declined following non-pharmacological interventions. Hospital admissions peaked about 1 week later [2] reflecting the median period of symptoms before hospital presentation. A “second wave” of infections started in London around the beginning of October 2020 [3].

Genome sequencing identified the Alpha variant (the B.1.1.7 lineage) around the South East of England, which spread rapidly as part of the emerging second wave [4]. This occurred prior to widespread vaccination, with only 25% of the adult population receiving the first dose by mid-February 2021 [5]. The Alpha variant has been associated with increased transmissibility in community studies [6] [7], and community studies associate the variant with increased mortality [8] [9]. However, published studies in hospitalised patients suggested no increase in need for ventilation or mortality [10].

Changes in transmissibility and severity have the potential to affect the burden on healthcare systems, and modify the characteristics of cases presenting to hospitals including the demographics, comorbidities and severity of disease associated with SARS-CoV-2 infection.

## Objectives

We linked clinical datasets with local SARS-CoV-2 variant analysis to compare admission characteristics of hospitalised cases during the two waves of infection and to look at the association of the Alpha variant with severity of disease at presentation to hospital.

## Methods

### Setting

Guy's and St Thomas' NHS Foundation Trust (GSTT) is a multi-site healthcare institution providing general and emergency services predominantly to the South London boroughs of Lambeth and Southwark. An acute-admitting site (St Thomas' Hospital) has an adult emergency department, with a large critical care service including one of the UK's eight nationally commissioned extra corporeal membrane oxygenation (ECMO) centres for severe respiratory failure. A second site (Guy's Hospital) provides more inpatient services such as elective surgery, cancer care and other specialist services. A paediatric hospital (Evelina London) acts as a general and specialised referral centre. Several satellite sites for specialist services like dialysis, rehabilitation and long term care are also part of the institution. GSTT receives patients from regional hospitals predominantly to critical care through 'mutual aid' schemes.

### SARS-CoV-2 laboratory testing

Our laboratory began testing on 13<sup>th</sup> March 2020 with initial capacity for around 150 PCR tests per day, before increasing to around 500 tests per day in late April during wave one, and up to 1000 tests per day during wave two (Supplementary Figure 1).

Testing commenced during the first wave on 13<sup>th</sup> March 2020 limited to cases requiring admission or inpatients who had symptoms of fever or cough, as per national recommendation; guidance suggested cases which did not require admission should not be tested. For wave two, all cases admitted to hospital were screened and underwent universal interval screening at varying time points. Staff testing for symptomatic healthcare workers was also introduced towards the end of wave one. Comparative analysis was therefore restricted to SARS-CoV-2 RNA positive cases requiring admission. Cases without laboratory confirmation of SARS-CoV-2 infection were not included.

1 Assays used for the detection of SARS-CoV-2 RNA include PCR testing using Aus Diagnostics or  
2 by the Hologic Aptima SARS-CoV-2 Assay. Nucleic acid was first extracted using the QIAGEN  
3 QIAAsymphony SP system and a QIAAsymphony DSP Virus/Pathogen Mini Kit (catalogue No: 937036)  
4 with the off-board lysis protocol.  
5  
6  
7  
8  
9

## 10 **Definitions and participants**

11 Cases were identified by the first positive SARS-CoV-2 RNA test. Cases were placed in mutually  
12 exclusive categories with the following definitions: 1) outpatients 2) testing through occupational  
13 health 3) emergency department attenders not subsequently admitted within 14 days 4) patients  
14 admitted within 14 days of a positive test 5) nosocomial cases, defined based on ECDC definitions,  
15 as those having a first positive test on day 8 or later after admission to hospital where COVID-19  
16 was not suspected on admission [11] and 6) interhospital transfers.  
17  
18  
19  
20  
21  
22  
23  
24  
25  
26  
27  
28  
29

30 For the purpose of comparison, only the inpatient group admitted within 14 days following a positive  
31 test, were taken forward for onward comparison. This methodology of only including admissions was  
32 adopted to prevent increased testing during the pandemic affecting case ascertainment and biasing  
33 severity of cases. This is evidenced in Supplementary Figure 1, with tests increasing steadily from  
34 100 per day to more than 1000 per day. Additionally, in wave two more interhospital transfers of  
35 severe cases requiring extracorporeal membrane oxygenation were received, mostly several days  
36 after admission. This category of patients were therefore excluded from analysis to prevent biasing  
37 towards severe disease.  
38  
39  
40  
41  
42  
43  
44  
45  
46  
47  
48  
49

50 A composite datapoint for 'hypoxia' was created, equivalent to WHO ordinal scale of  $\geq 4$  [12], with  
51 cases taken to be hypoxic if on admission they had oxygen saturations of  $< 94\%$ , if they were  
52 recorded as requiring supplemental oxygen, or if the fraction of inspired oxygen was recorded as  
53 being greater than 0.21.  
54  
55  
56  
57  
58  
59  
60

## **Determination of SARS-CoV-2 lineage**



Whole genome sequencing of residual samples from SARS-CoV-2 cases was performed using GridION (Oxford Nanopore Technology), using version 3 of the ARTIC protocol [13] and bioinformatics pipeline [14]. Samples were selected for sequencing if the corrected CT value was 33 or below, or the Hologic Aptima assay was above 1000 RLU. During the first wave, sequencing occurred between March 1st - 31st, whilst sequencing in the second wave restarted in November 2020 - March 2021. Variants were called using updated versions of pangolin 2.0 [15]. We considered all cases in wave one to be non-Alpha variants, as our wave one cut-off of 25th July 2020 was 6 weeks prior to first identified cases of the Alpha variant in the UK [16] and before Alpha variant was first identified in our population in November 2020.

### Data sources, extraction and integration

Clinical, laboratory and demographic data for all cases with a laboratory reported SARS-CoV-2 PCR RNA test on nose and throat swabs or lower respiratory tract specimens were extracted from hospital electronic health record (EHR) data sources using records closest to the test date. Data were linked to the Index of Multiple Deprivation (IMD). Age, sex and ethnicity were extracted from EPR. Self-reported ONS ethnic categories were stratified into White (British, Irish, Gypsy and White-Other) or non-White (Black [African, Caribbean, and Black-Other], Asian [Bangladeshi, Chinese, Indian, Pakistan, and Asian-Other] and Mixed/Other). Numbers for which data were missing is listed by each variable. Comorbidities and medication history were extracted from the EPR and e-Noting using natural language processing (NLP). If a comorbidity was not recorded it was assumed not to be present. Cases were characterised as having/not having a past medical history of hypertension, cardiovascular disease (stroke, transient ischaemic attack, atrial fibrillation, congestive heart failure, ischaemic heart disease, peripheral artery disease or atherosclerotic disease), diabetes mellitus, chronic kidney disease, chronic respiratory disease (chronic obstructive pulmonary disease, asthma, bronchiectasis or pulmonary fibrosis) and neoplastic disease (solid tumours, haematological neoplasias or metastatic disease). Obesity was defined as either obesity present in the notes, or recorded Body Mass Index (BMI)  $\geq 30$  kg/m<sup>2</sup>. Medicines data were extracted using both structured queries and natural language processing tools with medical and drug dictionaries. Additionally,

checks on free text data were performed by a cardiovascular clinician to ensure the information was accurate.

Analysis was carried out on the secure Rosalind high-performance computer infrastructure [17] running Jupyter Notebook 6.0.3, R 3.6.3 and Python 3.7.6.

### **Statistical analysis and outcome measures**

Descriptive statistics were summarised with mean and standard deviation (SD) for continuous variables if the distribution is normal and median and interquartile range (IQR) if the distribution is non-normal. Count and percentages were used for categorical variables. For the comparisons of variables for wave one versus wave two variables, Alpha variant versus non-Alpha variants, as well as sequenced patients versus non-sequenced patients in wave two, Kruskal-Wallis test was used for continuous variables and Chi-squared test for categorical variables with significance level of  $p=0.05$ . Multivariate analysis was performed using logistic regression to assess the odds ratios of different risk factors (including age, sex, ethnicity (White, non-White, Unknown), variant status (Alpha or non-Alpha), and cardiovascular disease, hypertension, diabetes, chronic respiratory disease, cancer, kidney disease, HIV, transplant, and frailty) for hypoxia on admission as the binary outcome indicating severity at admission. Variables to be included in the multivariate analysis were chosen by literature review and expert opinion (see Supplementary Material). Cases with missing datapoints were dropped from analysis.

## Results

### General epidemiology and results of viral sequencing.

Figure 1 shows the incidence of SARS-CoV-2 cases, SARS-CoV-2 admissions, and nosocomial cases since March 13th 2020. In total 5810 individuals had a positive SARS-CoV-2 PCR test up until the data extraction date of 17th February 2021. Two “waves” are evident with July 25th taken as a separation date between waves, at which point a minimum of 12 wave one cases remained in hospital. Wave one comprised 1528 cases (26.3%) from when laboratory testing commenced on March 13th to peak rapidly between the 1st and 8th April 2020 with 57 new cases per day, before falling to a baseline by May 12th 2020. Ninety-one percent (1391/1528) of all cases in wave one occurred during these 60 days. Wave two comprised 4282 cases (73.7%), with incidence first increasing gradually from the beginning of October. There was then a period of rapidly escalating incidence from about 10th December, peaking on 28th December 2020 when 139 cases per day were diagnosed. 3446/4282 (80%) of wave two cases were detected during a comparable 60 day period between 10th December 2020 and 8th February 2021. In both waves, nosocomial cases peaked early, increasing along with admissions but then fell while the number of community admissions continued at peak levels.

**Figure 1:** Distribution of laboratory confirmed SARS-CoV-2 cases over time. Daily incidence of new cases (beige), newly admitted cases (orange) and nosocomial acquisitions (green) over time.

Individuals with a positive test were placed into six categories (Figure 2). The 5810 SARS-CoV-2 cases were categorised as follows, inpatients admitted within 14 days of a positive test (n=2341), healthcare workers (n=1549), outpatients (n=874), emergency department (ED) attenders not subsequently admitted (n=532), inter-hospital transfers (n=281) and nosocomial cases (n=233). Some observed differences between waves one and two reflected the increased availability of testing particularly for outpatients (208;13.6% v 666;15.6%), people sent home from ED (111;7.3% v 421; 9.8%) and healthcare workers (171;11.2% v 1378;32.2%). There were also more interhospital transfers of known COVID-19 cases in wave two (177;4.1% v 104;6.8% in wave one). In wave two,

the number of admissions increased (1503; 35.1% v 838; 54.8%) along with nosocomial cases (137;3.2% v 96;6.3%) compared with wave one.

**Figure 2 (A)** Absolute number of cases within the different hospital cohorts during wave one (upper) and wave two (lower). **(B)** Proportion of cases within the different hospital cohorts during wave one (upper) and wave two (lower).

Figure 3 shows the 1470 successfully sequenced SARS-CoV-2 isolates over time, with 382 from wave one and 1088 from wave two. Sequencing was successful for 216/838 (26%) admitted cases from wave one, 472/1503 (31%) admitted cases in wave two, and 121/233 (52%) nosocomial cases. The proportion of Alpha variant increased rapidly after the first Alpha isolate was identified on 15th November 2020, accounting for approximately two thirds within 3 weeks, and almost 100% (600/617 isolates, 97%) in January 2021. In the second wave, the Alpha variant made up 83% (908/1088) of all sequenced isolates, 85% (400/472) of sequenced isolates from admitted cases, and 88% (51/59) of sequenced isolates from nosocomial cases. In addition, two cases of the B.1.351 beta variant of concern were also detected in the wave two admission cohort.

**Figure 3** Number of cases with sequenced SARS-CoV-2 isolates by epi-week (bar) and the proportion of which were made up of the alpha variant B.1.1.7 (red line)

### Comparison of characteristics of admitted cases between waves one and two

Descriptive statistics of cases admitted during wave one (n=838) and wave two (n=1503) were compared (Table 1). There was a statistically significant difference in median age of 2 years (62yrs in wave one v 60yrs in wave two, p=0.019) and admitted cases were more likely to be female in wave two (47.3% v 41.8%, p=0.011). A larger proportion of admitted cases in wave two were obese (29.1% v 24.6%, p=0.02). Comparison of comorbidities showed that those in wave two were less likely to have a diagnosis of frailty (11.5% v 22.8%, p<0.001), history of stroke (4.3% v 8.6%, p<0.001) or cancer (4.8% v 7.2%, p=0.022). There was no significant difference in proportion with

known comorbidities of diabetes, kidney disease, hypertension, cardiovascular disease or respiratory disease.

**Table 1: Descriptive statistics of the cohort for wave one (n=838) and wave two (n=1503) admissions**

|                                 | Missing | Wave one<br>n (%) | Wave two<br>n (%) | Wave one<br>Median [IQR] | Wave two<br>Median [IQR] | P-Value |
|---------------------------------|---------|-------------------|-------------------|--------------------------|--------------------------|---------|
| <b>Demographics</b>             |         |                   |                   |                          |                          |         |
| Age                             | 0       |                   |                   | 62.0 [49.0,78.0]         | 60.0 [47.0,74.0]         | 0.019   |
| Male                            | 0       | 488 (58.2)        | 792 (52.7)        |                          |                          | 0.011   |
| Ethnicity                       | 0       |                   |                   |                          |                          | 0.013   |
| White                           |         | 331 (39.5)        | 598 (39.8)        |                          |                          |         |
| Asian                           |         | 64 (7.6)          | 121 (8.1)         |                          |                          |         |
| Black-African                   |         | 177 (21.1)        | 262 (17.4)        |                          |                          |         |
| Black-Caribbean                 |         | 73 (8.7)          | 98 (6.5)          |                          |                          |         |
| Mixed                           |         | 15 (1.8)          | 18 (1.2)          |                          |                          |         |
| Other                           |         | 45 (5.4)          | 107 (7.1)         |                          |                          |         |
| Unknown                         |         | 133 (15.9)        | 299 (19.9)        |                          |                          |         |
| BMI                             | 577     |                   |                   | 27.0 [23.8,31.7]         | 27.7 [24.0,32.9]         | 0.022   |
| BMI>30                          |         | 206 (24.6)        | 438 (29.1)        |                          |                          | 0.02    |
| BMI>40                          |         | 34 (4.1)          | 86 (5.7)          |                          |                          | 0.098   |
| <b>Physiological parameters</b> |         |                   |                   |                          |                          |         |
| Heart Rate (bpm)                | 360     |                   |                   | 84.0 [75.0,94.0]         | 81.0 [72.0,91.0]         | <0.001  |
| Heart Rate>100                  |         | 105 (12.5)        | 142 (9.4)         |                          |                          | 0.02    |
| <b>Blood pressure (mmHg)</b>    |         |                   |                   |                          |                          |         |
| Systolic                        | 369     |                   |                   | 125.0 [113.0,139.0]      | 127.0 [115.0,141.0]      | 0.013   |
| Diastolic                       | 369     |                   |                   | 73.0 [65.0,80.0]         | 75.0 [68.0,82.0]         | <0.001  |
| MAP                             | 369     |                   |                   | 90.7 [82.2,99.0]         | 92.3 [84.7,101.3]        | <0.001  |
| Respiratory Rate (per min)      | 359     |                   |                   | 19.0 [18.0,22.0]         | 19.0 [18.0,22.0]         | 0.764   |
| Respiratory Rate>20             |         | 200 (23.9)        | 365 (24.3)        |                          |                          | 0.86    |
| Hypoxia                         | 658     | 370 (64.3)        | 726 (65.5)        |                          |                          | 0.67    |
| Temperature (°C)                | 361     |                   |                   | 36.9 [36.4,37.5]         | 36.6 [36.2,37.2]         | <0.001  |
| NEWS2                           | 405     |                   |                   |                          |                          | 0.86    |
| 0                               |         | 95 (11.3)         | 173 (11.5)        |                          |                          |         |
| 1                               |         | 108 (12.9)        | 192 (12.8)        |                          |                          |         |
| 2                               |         | 117 (14.0)        | 188 (12.5)        |                          |                          |         |
| >2                              |         | 371 (44.3)        | 692 (46.0)        |                          |                          |         |
| <b>Laboratory parameters</b>    |         |                   |                   |                          |                          |         |

|    |                                    |      |                      |                      |        |
|----|------------------------------------|------|----------------------|----------------------|--------|
| 1  | Neutrophils (x 10 <sup>9</sup> /L) | 8    | 4.9 [3.4,7.6]        | 5.0 [3.3,7.5]        | 0.724  |
| 2  | Lymphocytes (x 10 <sup>9</sup> /L) | 7    | 0.9 [0.6,1.3]        | 0.9 [0.6,1.4]        | 0.741  |
| 3  | NLR                                | 8    | 5.4 [3.1,9.9]        | 5.4 [3.2,9.8]        | 0.951  |
| 4  | Creatinine (umol/L)                | 43   | 83.0 [64.0,115.0]    | 86.0 [68.0,117.0]    | 0.065  |
| 5  | Urea (mmol/L)                      | 855  | 7.0 [4.6,12.2]       | 6.0 [4.3,9.9]        | 0.001  |
| 6  | Estimated GFR (ml/min)             | 114  | 73.0 [48.0,98.0]     | 69.0 [48.0,89.0]     | 0.001  |
| 7  | Albumin (g/L)                      | 185  | 37.0 [32.0,40.0]     | 38.0 [34.0,41.0]     | <0.001 |
| 8  | CRP (mg/L)                         | 61   | 74.5 [26.0,148.0]    | 51.0 [18.0,103.8]    | <0.001 |
| 9  | D-Dimer (mg/L FEU)                 | 1297 | 1.1 [0.6,3.0]        | 0.9 [0.5,2.2]        | 0.001  |
| 10 | Ferritin (ug/L)                    | 905  | 855.0 [394.0,1533.5] | 699.0 [342.0,1359.0] | 0.05   |
| 11 | <b>Co-morbidities</b>              |      |                      |                      |        |
| 12 | Stroke                             | 0    | 72 (8.6)             | 64 (4.3)             | <0.001 |
| 13 | TIA                                | 0    | 9 (1.1)              | 20 (1.3)             | 0.731  |
| 14 | Hypertension                       | 0    | 288 (34.4)           | 464 (30.9)           | 0.091  |
| 15 | Diabetes                           | 0    | 246 (29.4)           | 384 (25.5)           | 0.052  |
| 16 | AF                                 | 0    | 63 (7.5)             | 115 (7.7)            | 0.972  |
| 17 | IHD                                | 0    | 146 (17.4)           | 244 (16.2)           | 0.495  |
| 18 | Heart Failure                      | 0    | 54 (6.4)             | 105 (7.0)            | 0.679  |
| 19 | COPD                               | 0    | 64 (7.6)             | 109 (7.3)            | 0.796  |
| 20 | Asthma                             | 0    | 74 (8.8)             | 138 (9.2)            | 0.835  |
| 21 | Cancer                             | 0    | 60 (7.2)             | 72 (4.8)             | 0.022  |
| 22 | Kidney disease                     | 0    | 112 (13.4)           | 181 (12.0)           | 0.389  |
| 23 | HIV                                | 0    | 21 (2.5)             | 36 (2.4)             | 0.979  |
| 24 | Solid organ Transplant             | 0    | 24 (2.9)             | 49 (3.3)             | 0.686  |
| 25 | Frailty                            | 0    | 191 (22.8)           | 173 (11.5)           | <0.001 |

†: p-value was from Kruskal-Wallis test for continuous variables and Chi-squared test for categorical variables.

Abbreviations: BMI: Body Mass Index, TIA: Transient Ischaemic Attack, IHD: Ischemic Heart Disease, COPD: Chronic Obstructive Pulmonary Disease, HIV: Human Immunodeficiency Virus, MAP: Mean Arterial Pressure, SPO2: Oxygen Saturation, GFR: Glomerular Filtration Rate, CRP: C-Reactive Protein, NLR: Neutrophils and Lymphocytes Ratio, NEWS2: National Early Warning Score 2.

1  
2  
3  
4  
5  
6  
7  
8  
9  
10  
11  
12  
13  
14  
15  
16  
17  
18  
19  
20  
21  
22  
23  
24  
25  
26  
27  
28  
29  
30  
31  
32  
33  
34  
35  
36  
37  
38  
39  
40  
41  
42  
43  
44  
45  
46  
47  
48  
49  
50  
51  
52  
53  
54  
55  
56  
57  
58  
59  
60

There were no significant differences between waves in the proportion with severe SARS-CoV-2 disease upon admission as judged by hypoxia (64.3% in wave one vs 65.5% in wave two,  $p=0.67$ ) or tachypnoea (respiratory rate $>20$ ) (23.9% vs 24.3%,  $p=0.86$ ). There were small differences in other physiological parameters on admission, some of which reached statistical significance but differences were not clinically relevant.

Laboratory markers were compared between waves (Table 1). There were small but significant differences, such as lower CRP (median 51.0 mg/dL (IQR: 18.0-103.8) v 74.5 mg/dL (IQR: 26.0-148.0),  $p<0.001$ ) and lower ferritin (699.0 [IQR: 342.0-1359.0] v 855.0 [IQR: 394.0-1533.5],  $p=0.05$ ) in wave two. There were other small statistically significant differences without clear clinical significance, such as a lower D-Dimer in wave two (0.9 mg/L FEU [IQR: 0.5-2.2] v 1.1 mg/L FEU [IQR:0.6-3.0],  $p=0.001$ ), and lower estimated GFR (69.0 ml/min [IQR: 48.0-89.0] v 73.0 ml/min [IQR: 48.0-98.0],  $p=0.001$ ), lower urea (6.0 mmol/L [IQR: 4.3-9.3] v 7.0 mmol/L [IQR: 4.6-12.2],  $p=0.001$ ) and higher albumin (38.0 g/L [IQR: 34.0-41.0 g/L] vs 37.0 g/L [IQR: 32.0-40.0],  $p<0.001$ ). There was no significant difference with neutrophils, lymphocytes, neutrophils and lymphocytes ratio (NLR), creatinine and glucose.

### **Comparison of characteristics of admitted cases infected with Alpha and non-Alpha variants**

Given the reported association between increased disease severity and transmission with the Alpha variant, we compared demographic, physiological and laboratory parameters between admitted cases with infection caused by Alpha variant ( $n=400$ ) with non-Alpha ( $n=910$ ) variants (Table 2).

**Table 2: Descriptive statistics of the cohort for non-Alpha variant (n=910) and Alpha variant (n=400) admissions**

|                                   | Missing | Non Alpha variant n (%) | Alpha variant n (%) | Non Alpha variant value [IQR] | Alpha variant value [IQR] | P-Value |
|-----------------------------------|---------|-------------------------|---------------------|-------------------------------|---------------------------|---------|
| <b>Demographics</b>               |         |                         |                     |                               |                           |         |
| Age                               | 0       |                         |                     | 62.0 [49.0,78.0]              | 64.0 [52.0,78.0]          | 0.22    |
| Male                              |         | 530 (58.2)              | 208 (52.0)          |                               |                           | 0.042   |
| Ethnicity                         | 0       |                         |                     |                               |                           | 0.402   |
| White                             |         | 358 (39.3)              | 164 (41.0)          |                               |                           |         |
| Asian                             |         | 71 (7.8)                | 38 (9.5)            |                               |                           |         |
| Black-African                     |         | 191 (21.0)              | 67 (16.8)           |                               |                           |         |
| Black-Caribbean                   |         | 78 (8.6)                | 27 (6.8)            |                               |                           |         |
| Mixed                             |         | 16 (1.8)                | 6 (1.5)             |                               |                           |         |
| Other                             |         | 50 (5.5)                | 23 (5.8)            |                               |                           |         |
| Unknown                           |         | 146 (16.0)              | 75 (18.8)           |                               |                           |         |
| BMI                               | 334     |                         |                     | 27.1 [23.8,31.7]              | 28.1 [24.0,34.2]          | 0.036   |
| BMI>30                            |         | 226 (24.8)              | 121 (30.2)          |                               |                           | 0.048   |
| BMI>40                            |         | 36 (4.0)                | 26 (6.5)            |                               |                           | 0.063   |
| <b>Physiological parameters</b>   |         |                         |                     |                               |                           |         |
| Heart Rate (bpm)                  | 198     |                         |                     | 84.0 [74.0,94.0]              | 80.0 [72.0,90.0]          | 0.001   |
| Heart Rate>100                    |         | 118 (13.0)              | 36 (9.0)            |                               |                           | 0.05    |
| <b>Blood pressure (mmHg)</b>      |         |                         |                     |                               |                           |         |
| Systolic                          | 201     |                         |                     | 125.0 [113.0,139.5]           | 127.0 [115.0,142.0]       | 0.138   |
| Diastolic                         | 201     |                         |                     | 73.0 [65.0,80.0]              | 75.0 [67.0,83.0]          | 0.01    |
| MAP                               | 201     |                         |                     | 90.7 [82.3,99.2]              | 92.7 [84.0,101.7]         | 0.022   |
| Respiratory Rate (per min)        | 194     |                         |                     | 19.0 [18.0,21.0]              | 19.0 [18.0,22.0]          | 0.591   |
| Respiratory Rate>20               |         | 209 (23.0)              | 96 (24.0)           |                               |                           | 0.737   |
| Hypoxia                           | 0       | 392 (62.5)              | 217 (70.0)          |                               |                           | 0.029   |
| Temperature (°C)                  | 199     |                         |                     | 36.9 [36.4,37.5]              | 36.6 [36.2,37.1]          | <0.001  |
| NEWS2                             | 218     |                         |                     |                               |                           | 0.038   |
| 0                                 |         | 107 (11.8)              | 43 (10.8)           |                               |                           |         |
| 1                                 |         | 125 (13.7)              | 39 (9.8)            |                               |                           |         |
| 2                                 |         | 127 (14.0)              | 53 (13.2)           |                               |                           |         |
| >2                                |         | 391 (43.0)              | 207 (51.7)          |                               |                           |         |
| <b>Laboratory parameters</b>      |         |                         |                     |                               |                           |         |
| Neutrophils (x10 <sup>9</sup> /L) | 2       |                         |                     | 4.9 [3.4,7.6]                 | 4.8 [3.3,6.9]             | 0.479   |
| Lymphocytes (x10 <sup>9</sup> /L) | 1       |                         |                     | 0.9 [0.6,1.3]                 | 0.8 [0.5,1.2]             | 0.005   |
| NLR                               | 2       |                         |                     | 5.4 [3.1,9.9]                 | 5.8 [3.5,10.2]            | 0.195   |



|    |                        |     |                      |                      |        |
|----|------------------------|-----|----------------------|----------------------|--------|
| 1  | Creatinine (umol/L)    | 16  | 83.0 [64.0,115.0]    | 92.0 [74.0,126.0]    | <0.001 |
| 2  | Urea (mmol/L)          | 536 | 6.8 [4.3,12.0]       | 6.6 [4.4,10.6]       | 0.573  |
| 3  | Estimated GFR (ml/min) | 43  | 73.0 [48.5,97.0]     | 63.5 [44.0,81.0]     | <0.001 |
| 4  | Albumin (g/L)          | 107 | 37.0 [33.0,41.0]     | 38.0 [34.0,41.0]     | 0.009  |
| 5  | CRP (mg/L)             | 21  | 70.0 [25.0,142.0]    | 54.0 [24.0,102.0]    | <0.001 |
| 6  | D-Dimer (mg/L FEU)     | 727 | 1.1 [0.6,2.8]        | 0.9 [0.5,1.9]        | 0.019  |
| 7  | Ferritin (ug/L)        | 501 | 815.0 [366.2,1499.0] | 712.0 [357.5,1294.0] | 0.341  |
| 8  | <b>Co-morbidities</b>  |     |                      |                      |        |
| 9  | Stroke                 | 0   | 74 (8.1)             | 22 (5.5)             | 0.117  |
| 10 | TIA                    | 0   | 12 (1.3)             | 5 (1.2)              | 0.87   |
| 11 | Hypertension           | 0   | 315 (34.6)           | 144 (36.0)           | 0.674  |
| 12 | Diabetes               | 0   | 267 (29.3)           | 106 (26.5)           | 0.326  |
| 13 | AF                     | 0   | 72 (7.9)             | 42 (10.5)            | 0.154  |
| 14 | IHD                    | 0   | 162 (17.8)           | 78 (19.5)            | 0.513  |
| 15 | Heart Failure          | 0   | 61 (6.7)             | 34 (8.5)             | 0.299  |
| 16 | COPD                   | 0   | 74 (8.1)             | 32 (8.0)             | 0.977  |
| 17 | Asthma                 | 0   | 84 (9.2)             | 39 (9.8)             | 0.846  |
| 18 | Cancer                 | 0   | 64 (7.0)             | 21 (5.2)             | 0.278  |
| 19 | Kidney disease         | 0   | 122 (13.4)           | 62 (15.5)            | 0.359  |
| 20 | HIV                    | 0   | 22 (2.4)             | 10 (2.5)             | 0.916  |
| 21 | Solid organ transplant | 0   | 25 (2.7)             | 19 (4.8)             | 0.092  |
| 22 | Frailty                | 0   | 204 (22.4)           | 58 (14.5)            | 0.001  |

† p-value was from Kruskal-Wallis test for continuous variables and Chi-squared test for categorical variables.

Abbreviations: BMI: Body Mass Index, TIA: Transient Ischaemic Attack, IHD: Ischemic Heart Disease, COPD: Chronic Obstructive Pulmonary Disease, HIV: Human Immunodeficiency Virus, MAP: Mean Arterial Pressure, SPO2: Oxygen Saturation, GFR: Glomerular Filtration Rate, CRP: C-Reactive Protein, NLR: Neutrophils and Lymphocytes Ratio, NEWS2: National Early Warning Score 2.

1 Groups with non-Alpha and Alpha variants were not significantly different in median age (62yrs vs  
2 64yrs,  $p=0.22$ ) or ethnicity. The proportion of admissions who were female was larger in the group  
3  
4 infected with the Alpha variant compared to those infected by non-Alpha variants (48.0% vs 41.8%,  
5  
6  $p=0.01$ ).  
7  
8  
9

10  
11 Cases infected with the Alpha variant were less likely to be frail (14.5% vs 22.4%  $p=0.001$ ). A higher  
12  
13 proportion of those in the Alpha variant group were obese (30.2% v 24.8%,  $p=0.048$ ). Other minor  
14  
15 differences in comorbidities between groups are shown in Table 2, but did not reach statistical  
16  
17 significance.  
18  
19

20  
21  
22 On admission a higher proportion of those infected with the Alpha variant were hypoxic (70.0% vs  
23  
24 62.5%,  $p=0.029$ ), the main indicator of severe disease. CRP on admission was lower in the Alpha  
25  
26 variant group (54 mg/L IQR: 24.0-102.0) compared to those infected with non-Alpha variants (70  
27  
28 mg/L, IQR: 25.0-142.0  $p<0.001$ ). Differences in other laboratory parameters did not meet either  
29  
30 statistical or clinical significance.  
31  
32  
33

### 34 35 36 **Multivariate analysis of factors associated with severity of COVID-19 on admission**

37  
38  
39 Multivariate logistic regression was applied to look at associations with severity of disease on  
40  
41 admission as measured by hypoxia (Table 3), equivalent to WHO ordinal scale of  $\geq 4$  [12]. Age, sex,  
42  
43 ethnicity, comorbidities and variant status (Alpha vs non-Alpha) were entered into the model.  
44  
45 Severity of disease on admission, as measured by hypoxia, was the outcome variable. Age was a  
46  
47 significant predictor of severity, with an odds ratio of 1.02 (CI 1.01-1.03,  $p<0.001$ ) for hypoxia on  
48  
49 admission for every advancing year. Obesity was associated with severity, giving an OR 1.70 (CI  
50  
51 1.28-2.26,  $p<0.001$ ). Infection with the Alpha variant was also associated with increased hypoxia on  
52  
53 admission (OR 1.68 CI: 1.26-2.24,  $p<0.001$ ). Other variables were not significantly associated with  
54  
55 hypoxia on admission, including sex, ethnicity and comorbidities.  
56  
57  
58  
59  
60

**Table 3: Odds ratios for severity (hypoxia) at admission from multivariate logistic****regression model**

|                             | OR   | p-value | 95% CI      |
|-----------------------------|------|---------|-------------|
| Age                         | 1.02 | <0.001  | 1.01 - 1.03 |
| Male                        | 0.96 | 0.75    | 0.73 - 1.25 |
| <b>Ethnicity</b>            |      |         |             |
| non-White                   | 1.15 | 0.35    | 0.86 - 1.55 |
| Unknown                     | 1.20 | 0.36    | 0.81 - 1.77 |
| <b>Comorbidity</b>          |      |         |             |
| BMI>30                      | 1.70 | <0.001  | 1.28 - 2.26 |
| Cardiovascular              | 0.79 | 0.15    | 0.58 - 1.09 |
| Hypertension                | 1.11 | 0.52    | 0.81 - 1.51 |
| Diabetes                    | 0.75 | 0.07    | 0.55 - 1.02 |
| Chronic respiratory disease | 1.20 | 0.32    | 0.83 - 1.74 |
| Cancer                      | 0.60 | 0.06    | 0.35 - 1.02 |
| Kidney disease              | 0.74 | 0.17    | 0.48 - 1.14 |
| HIV                         | 1.74 | 0.16    | 0.80 - 3.78 |
| Organ transplant            | 0.79 | 0.55    | 0.37 - 1.71 |
| Frailty                     | 0.96 | 0.85    | 0.64 - 1.45 |
| Alpha variant               | 1.68 | <0.001  | 1.26 - 2.24 |

Abbreviations: BMI: Body mass index, HIV: Human Immunodeficiency Virus

## Comparison of non-sequenced and sequenced cases in wave two

1  
2 We assessed for differences between the non-sequenced and sequenced inpatient cases to identify  
3  
4 any possible bias in those that were sequenced. Demographics, admission physiological and  
5  
6 laboratory parameters, and the outcome measure of hypoxia on admission are presented in Table  
7  
8  
9 4. There was no significant difference of the proportion with the outcome measure, hypoxia on  
10  
11 admission, in both the sequenced and non-sequenced inpatient group (47% vs 50%,  $p=0.381$ ).  
12  
13 There was no significant difference in the proportion of males in the sequenced group compared to  
14  
15 the non-sequenced group (52.2% vs 53.8%,  $p=0.595$ ), as with obesity (39.5% vs 38.4%,  $p=0.783$ )  
16  
17 or the proportion of those from non-White ethnic backgrounds (41.4% vs 40.5%,  $p=0.934$ ). On  
18  
19 average, sequenced inpatient cases were significantly older (63 vs 57 years,  $p<0.001$ ) and had a  
20  
21 larger proportion of some comorbidities than non-sequenced cases.  
22  
23  
24  
25  
26  
27  
28  
29  
30  
31  
32  
33  
34  
35  
36  
37  
38  
39  
40  
41  
42  
43  
44  
45  
46  
47  
48  
49  
50  
51  
52  
53  
54  
55  
56  
57  
58  
59  
60

**Table 4: Patient characteristics of sequenced and non-sequenced inpatients in wave two.**

|                                 | Non-sequenced | Sequenced   | P-Value |
|---------------------------------|---------------|-------------|---------|
| n                               | 1031          | 472         |         |
| Age (SD)                        | 57.3 (21.0)   | 62.9 (19.9) | <0.001  |
| Male (%)                        | 538 (52.2)    | 254 (53.8)  | 0.595   |
| Ethnicity (%)                   |               |             | 0.934   |
| White                           | 418 (40.5)    | 194 (41.1)  |         |
| non-White                       | 417 (40.4)    | 192 (40.7)  |         |
| Unknown                         | 196 (19.0)    | 86 (18.2)   |         |
| <b>Comorbidities</b>            |               |             |         |
| BMI>30 (%)                      | 302 (38.4)    | 139 (39.5)  | 0.783   |
| Cardiovascular (%)              | 218 (21.1)    | 142 (30.1)  | <0.001  |
| Hypertension (%)                | 300 (29.1)    | 172 (36.4)  | 0.005   |
| Diabetes (%)                    | 269 (26.1)    | 127 (26.9)  | 0.787   |
| Chronic respiratory Disease (%) | 143 (13.9)    | 82 (17.4)   | 0.091   |
| Cancer (%)                      | 46 (4.5)      | 26 (5.5)    | 0.452   |
| Kidney Disease (%)              | 116 (11.3)    | 74 (15.7)   | 0.021   |
| HIV (%)                         | 26 (2.5)      | 11 (2.3)    | 0.966   |
| Organ transplant (%)            | 31 (3.0)      | 18 (3.8)    | 0.509   |
| Frailty (%)                     | 108 (10.5)    | 76 (16.1)   | 0.003   |
| Hypoxia (%)                     | 491 (47.6)    | 237 (50.2)  | 0.381   |

Abbreviations: BMI: Body mass index, HIV: Human Immunodeficiency Virus.

## Discussion

1  
2 Our data from a large, multi-site healthcare institution in one of the worst affected regions  
3  
4 internationally provides a large dataset for in-depth comparison; for instance we report a similar  
5  
6 number of cases as reported from a national observational cohort study from Japan [18]. Our  
7  
8 hospitalised cohort shares similar demographics to other city populations in the UK, representative  
9  
10 of London with around 40% of individuals from non-White ethnicities [19]. This compares to national  
11  
12 population studies where the average age of cases was much lower and with lower proportion from  
13  
14 non-White ethnicities [8,20].  
15  
16  
17  
18  
19

20 There were threefold more SARS-CoV-2 RNA positive cases reported by the hospital laboratory in  
21  
22 wave two. Partly this is attributed to increased testing capacity and changing testing strategy  
23  
24 throughout 2020 (Supplementary Figure 1). Due to capacity limits, during wave one it was not local  
25  
26 policy to offer testing to outpatients and those not requiring admission, instead relying on clinical  
27  
28 diagnosis. Healthcare workers were not offered occupational health testing until the end of wave  
29  
30 one. We therefore restricted comparison to inpatient and nosocomial cases.  
31  
32  
33  
34  
35

36 There were almost twice as many admitted cases in wave two compared with wave one (1503 v  
37  
38 838). This is consistent with a higher local community incidence as reported by the ONS infection  
39  
40 survey with 3.5% of individuals in London infected in January 2021 [21], compared with 2.2% of  
41  
42 individuals in London at the peak of wave one [1]. The increase in peak hospital occupancy in wave  
43  
44 two has also been reported nationally [22]. A major contributor to this increase in hospital  
45  
46 admissions is likely to be the emergence of the Alpha variant, which is reported to be more  
47  
48 transmissible [7].  
49  
50  
51  
52  
53

54  
55 Our finding is the first study in hospitalised cohorts to show increased severity of disease with the  
56  
57 Alpha variant, as defined by hypoxia on admission which is equivalent to WHO ordinal scale of  $\geq 4$   
58  
59 [12] and a key marker of severe disease. The validity of using hypoxia as a marker of severity is  
60

1  
2  
3  
4  
5  
6  
7  
8  
9  
10  
11  
12  
13  
14  
15  
16  
17  
18  
19  
20  
21  
22  
23  
24  
25  
26  
27  
28  
29  
30  
31  
32  
33  
34  
35  
36  
37  
38  
39  
40  
41  
42  
43  
44  
45  
46  
47  
48  
49  
50  
51  
52  
53  
54  
55  
56  
57  
58  
59  
60

shown by the clinical characteristics of SARS-COV-2, with respiratory illness causing hypoxia in a minority of cases and with a smaller proportion having respiratory failure necessitating ventilation [23]. Hypoxia on admission was chosen as a marker of severity to prevent confounding of results by changes in management of hospitalised patients across the pandemic. For instance treatment steroids, which were introduced during the study period around November 2020, have been shown to reduce risk of ventilation and death [24]. Other improvements in management, such as proning, anticoagulation and tocilizumab could also confound the outcomes of death and ICU admission. Hypoxia on admission is not at risk of confounding by changes in management of cases, as currently no significant management or treatment options are deployed in the community.

Our finding of increased severity with the Alpha variant is consistent with that reported in community studies, which show increased hospitalisation [20] and mortality [8] with a similar hazard to which we find here for hypoxia on admission. Notably however, these community studies failed to control for comorbidities [8, 20]. The association with severity we find persists even after adjustment for age, sex, and comorbidities. Moreover, testing in the first wave prior to emergence of the Alpha variant was strict due to limited testing capacity, potentially leading to an ascertainment bias towards more severe cases in the first wave. In comparison in the second wave testing was more widespread, potentially leading to increased ascertainment of less severe cases. This makes it even more striking that the association of the Alpha variant, which dominated the second wave, with severe disease is so prominent.

Notably the only other published study in hospital cohorts showed no difference in severity as measured by the composite outcome of need for ventilation or death [10]. Broadly the two cohorts from these hospital cohorts are similar, with an average age of around 60 and a high proportion of non-white ethnicities. In general this supports the external validity of our findings, however replication in dissimilar cohorts are awaited. The difference between findings in our study and those of [10] may be related to the choice of outcome. Our choice of outcome, hypoxia on admission, represents the natural history of disease prior to medical intervention as no treatments are currently deployed in

1 the community. The mortality outcome investigated by Frampton *et al*, is after hospital treatment  
2 which may ameliorate the severity increase that we find with the alpha variant, thereby explaining  
3 the differences in severity seen between our studies. Interestingly, despite male sex being widely  
4 reported to be a risk factor for severe disease our multivariate model confirms findings by these  
5 authors that sex is not significantly associated with severity in hospitalised cohorts after adjusted  
6 analysis [10].  
7  
8  
9  
10  
11  
12  
13  
14

15 The lack of association between severity and male sex may corresponds to the increase in the  
16 proportion of females in the admitted cohort of wave two and those infected with Alpha, accounting  
17 for an extra 5% of admissions with SARS-CoV-2 infection. A study in press [25] suggests the Alpha  
18 variant may be more severe in hospitalised females, who may have increased mortality and/or  
19 requirement for ICU care. Our data, showing an increase in the proportion of females in the  
20 admission cohort and lack of expected association of severity with male sex is consistent with the  
21 finding that Alpha may show increased virulence in females.  
22  
23  
24  
25  
26  
27  
28  
29  
30  
31  
32  
33

34 We also included an assessment of bias by comparing characteristics of non-sequenced cases with  
35 those successfully sequenced. Whilst sequenced patients were older and more comorbid there was  
36 no significant difference between the proportion with the outcome measure of hypoxia on admission  
37 between our sequenced and non-sequenced cases. This suggests no significant bias towards  
38 severity in the sequenced group, which was predominantly made up of cases of the Alpha variant.  
39  
40  
41  
42  
43  
44  
45  
46  
47

48 Admitted cases in wave two were also around half as likely to have a diagnosis of frailty, which may  
49 be due to fewer admissions from care homes during wave two, which has been reported both  
50 nationally [26] and internationally [27]. Additionally, admitted cases were around a third less likely to  
51 have cancer in wave two. Both of these reductions may also be as a result of individuals shielding,  
52 and therefore at reduced risk for acquiring SARS-CoV-2 infection. Other differences in comorbidities  
53 between waves were small and of unclear clinical significance.  
54  
55  
56  
57  
58  
59  
60



1  
2  
3  
4  
5  
6  
7  
8  
9  
10  
11  
12  
13  
14  
15  
16  
17  
18  
19  
20  
21  
22  
23  
24  
25  
26  
27  
28  
29  
30  
31  
32  
33  
34  
35  
36  
37  
38  
39  
40  
41  
42  
43  
44  
45  
46  
47  
48  
49  
50  
51  
52  
53  
54  
55  
56  
57  
58  
59  
60

One additional striking observation was the similarity in number of nosocomial cases in wave one (n=96 of 934 [10%] inpatient cases) and wave two (n=137 of 1640 [8%] inpatient cases). This incidence of nosocomial infection is a major challenge for UK healthcare institutions, with associated crude mortality at around 30% during the first wave [28,29]. Interestingly, nosocomial cases in wave one increased and started to fall before impact of the main infection control interventions of banning hospital visitors (March 25th), introducing universal surgical mask wearing (28th March 2020) and universal regular inpatient screening (after the first wave). In comparison, all these measures were in place prior to the second wave. The similar number of cases in wave two may in part be due to increased inpatient screening, which would identify asymptomatic cases, or introduction of the more transmissible Alpha variant which made up the vast majority of our sequenced nosocomial cases.

Some healthcare institutions report far fewer nosocomial acquisitions; for instance an academic hospital in Boston, USA reported only 2 nosocomial cases in over 9000 admissions [30]. This could be due to greater availability of side rooms for isolation or their use of N95 masks by HCWs, which may decrease transmission between HCWs and patients. In contrast, current UK public health policy recommends surgical facemasks for patient interactions unless performing aerosol generating procedures [31]. For this reason it will be important to further investigate the factors involved in nosocomial acquisition in both waves.

One limitation of our study is that the population comes from one city and findings therefore needs to be compared with findings in other regions. Our dataset included cases confirmed by SARS-CoV-2 RNA testing in our laboratory, so may miss those diagnosed only clinically. We could not compare outcomes after hospital admission, such as ICU admission or mortality, due to changes in in-hospital management between waves. In addition, we were unable to include some variables associated with severity in other studies due to few cases with these features (e.g. pregnancy) or due to poor coding in the dataset (e.g. liver disease), which prevents us from commenting on the risk associated with these variables.

1 The number of cases diagnosed, admissions and nosocomial cases were higher in wave two than  
2 wave one, likely due to the increased incidence caused by the more transmissible Alpha variant.  
3  
4 Infection with the Alpha variant was associated with severity as measured by hypoxia on admission,  
5  
6 the first such finding in hospitalised cohorts. Our findings support growing evidence that emerging  
7  
8 variants may have altered virulence as well as increased transmissibility, with such evidence  
9  
10 providing support for public health efforts to contain their spread. More broadly, it also increases  
11  
12 understanding of the emergence of novel pathogens as they adapt to human hosts.  
13  
14  
15  
16  
17  
18  
19  
20  
21  
22  
23  
24  
25  
26  
27  
28  
29  
30  
31  
32  
33  
34  
35  
36  
37  
38  
39  
40  
41  
42  
43  
44  
45  
46  
47  
48  
49  
50  
51  
52  
53  
54  
55  
56  
57  
58  
59  
60

For peer review only

## Contributions

LBS and WW were involved in the conceptualization, methodology, formal analysis of the synthesised data and writing (original drafting, review, and editing). TC, AA-M and GN were involved in investigation being responsible for whole genome sequencing and analysis of results. RB, FH and LdJ were involved in resources, administration and data curation. YW, JE, VC were involved in supervision, funding acquisition and drafting (review and editing). All authors agreed the final manuscript.

## References

- 1 Edelstein M, Obi C, Chand M, *et al*. SARS-CoV-2 infection in London, England: changes to community point prevalence around lockdown time, March–May 2020. *J Epidemiol Community Health* Published Online First: 1 October 2020. doi:10.1136/jech-2020-214730
- 2 [dataset] UK Health Security Agency. Official UK Coronavirus Dashboard. <https://coronavirus.data.gov.uk/details/healthcare> (Accessed Mar 1, 2021).
- 3 Kirby T. New variant of SARS-CoV-2 in UK causes surge of COVID-19. *Lancet Respir Med* 2021;**9**:e20–1. doi:10.1016/S2213-2600(21)00005-9
- 4 Preliminary genomic characterisation of an emergent SARS-CoV-2 lineage in the UK defined by a novel set of spike mutations. 2020.<https://virological.org/t/preliminary-genomic-characterisation-of-an-emergent-sars-cov-2-lineage-in-the-uk-defined-by-a-novel-set-of-spike-mutations/563> (accessed 24 Jan 2021).
- 5 Sparrow A, Carroll R, Pidd H. UK Covid: Boris Johnson says ‘great strides’ made with vaccinations but many are yet to be reached – as it happened. The Guardian. 2021.<http://www.theguardian.com/politics/live/2021/feb/10/uk-covid-news-shapps-summer-holidays-abroad-travel-coronavirus-vaccine-live-latest-updates> (accessed 1 Mar 2021).
- 6 Chand M, Others. Investigation of novel SARS-COV-2 variant: Variant of Concern 202012/01 (PDF). *Public Health England PHE* 2020.
- 7 Volz E, Mishra S, Chand M, *et al*. Transmission of SARS-CoV-2 Lineage B.1.1.7 in England: Insights from linking epidemiological and genetic data. *Medrxiv* 2021 doi:10.1101/2020.12.30.20249034
- 8 Davies NG, Jarvis CI, John Edmunds W, *et al*. Increased mortality in community-tested cases of SARS-CoV-2 lineage B.1.1.7. *Nature* 2021;**593**:270–4. doi:10.1038/s41586-021-03426-1
- 9 Challen R, Brooks-Pollock E, Read JM, *et al*. Risk of mortality in patients infected with SARS-CoV-2 variant of concern 202012/1: matched cohort study. *BMJ* 2021;**372**. doi:10.1136/bmj.n579
- 10 Frampton D, Rampling T, Cross A, *et al*. Genomic characteristics and clinical effect of the emergent SARS-CoV-2 B.1.1.7 lineage in London, UK: a whole-genome sequencing and hospital-based cohort study. *Lancet Infect Dis* Published Online First: 12 April 2021.

doi:10.1016/S1473-3099(21)00170-5

- 11 ECDC. Surveillance definitions for COVID-19. <https://www.ecdc.europa.eu/en/covid-19/surveillance/surveillance-definitions> (accessed 24 Jan 2021).
- 12 Print RB. COVID-19 Therapeutic Trial Synopsis. *World Health Organisation* 2020. <https://www.who.int/publications/i/item/covid-19-therapeutic-trial-synopsis> (accessed 8 Aug 2021).
- 13 Quick J. nCoV-2019 sequencing protocol v1 (protocols.io.bbmuik6w). protocols.io. 2020. doi:10.17504/protocols.io.bbmuik6w
- 14 Artic Network. nCoV-2019 novel coronavirus bioinformatics protocol <https://artic.network/ncov-2019/ncov2019-bioinformatics-sop.html> (accessed 24 Jan 2021).
- 15 O'Toole Á, Scher E, Underwood A, et al. Assignment of epidemiological lineages in an emerging pandemic using the pangolin tool. *Virus Evol* 2021;7. doi:10.1093/ve/veab064
- 16 Rambaut A, Loman N, Pybus O, et al. C.-19 GC UK, Preliminary genomic characterisation of an emergent SARS-CoV-2 lineage in the UK defined by a novel set of spike mutations. virological.org (2020).
- 17 King's College London. Acknowledging - Rosalind research computing infrastructure. <https://rosalind.kcl.ac.uk/acknowledging/> (accessed 6 Mar 2021).
- 18 Saito S, Asai Y, Matsunaga N, et al. First and second COVID-19 waves in Japan: A comparison of disease severity and characteristics. *Journal of Infection*. 2020. doi:10.1016/j.jinf.2020.10.033
- 19 White E. Ethnicity and National Identity in England and Wales - Office for National Statistics. 2012. <https://www.ons.gov.uk/peoplepopulationandcommunity/culturalidentity/ethnicity/articles/ethnicityandnationalidentityinenglandandwales/2012-12-11> (accessed 18 Jun 2021).
- 20 Nyberg T, Twohig KA, Harris RJ, et al. Risk of hospital admission for patients with SARS-CoV-2 variant B.1.1.7: cohort analysis. *BMJ* 2021;373. doi:10.1136/bmj.n1412
- 21 Steel, K & Donnarumma, H. Coronavirus (COVID-19) Infection Survey, UK. Office for National Statistics. 2021. <https://www.ons.gov.uk/peoplepopulationandcommunity/healthandsocialcare/conditionsanddiseases/bulletins/coronaviruscovid19infectionsurveyspilot/8january2021> (accessed 1 Feb 2021).
- 22 NHS England Hospitals admit one third of COVID patients in a single month. <https://www.england.nhs.uk/2021/02/hospitals-admit-one-third-of-covid-patients-in-a-single-month/> (accessed 1 Mar 2021).
- 23 Wu Z, McGoogan JM. Characteristics of and important lessons from the coronavirus disease 2019 (COVID-19) outbreak in China: summary of a report of 72 314 cases from the Chinese Center for Disease Control and Prevention. *JAMA* 2020;323:1239–42. <https://jamanetwork.com/journals/jama/article-abstract/2762130>
- 24 RECOVERY Collaborative Group, Horby P, Lim WS, et al. Dexamethasone in Hospitalized Patients with Covid-19 - Preliminary Report. *N Engl J Med* Published Online First: 17 July 2020. doi:10.1056/NEJMoa202143625 Stirrup OT, Boshier FAT, Venturini C, et al. SARS-CoV-2 lineage B.1.1.7 is associated with greater disease severity among hospitalised women but not men. medRxiv; 2021. DOI: 10.1101/2021.06.24.21259107.
- 26 [dataset] John S. Deaths involving COVID-19 in the care sector, England and Wales - Office

for National Statistics. 2020.

<https://www.ons.gov.uk/peoplepopulationandcommunity/birthsdeathsandmarriages/deaths/articles/deathsinvolvingcovid19inthecaresectorenglandandwales/deathsoccurringupto12june2020andregisteredupto20june2020provisional> (accessed 25 Feb 2021).

- 27 Ioannidis JPA, Axfors C, Contopoulos-Ioannidis DG. Second versus first wave of COVID-19 deaths: shifts in age distribution and in nursing home fatalities. *medRxiv* 2020;:2020.11.28.20240366. doi:10.1101/2020.11.28.20240366
- 28 Carter B, Collins JT, Barlow-Pay F, *et al.* Nosocomial COVID-19 infection: examining the risk of mortality. The COPE-Nosocomial Study (COVID in Older PEople). *J Hosp Infect* 2020;**106**:376–84. doi:10.1016/j.jhin.2020.07.013
- 29 Snell LB, Fisher CL, Taj U, Stirrup O, Merrick B, Alcolea-Medina A, Charalampous T, Signell AW, Wilson HD, Betancor G, Kia Ik MT, Cunningham E, Cliff PR, Pickering S, Galao RP, Batra R, Neil SJD, Malim MH, Doores KJ, Douthwaite ST, Nebbia G; COVID-19 Genomics UK (COG-UK) consortium. Combined epidemiological and genomic analysis of nosocomial SARS-CoV-2 infection early in the pandemic and the role of unidentified cases in transmission. *Clin Microbiol Infect*. 2021 Aug 13:S1198-743X(21)00435-3. doi: 10.1016/j.cmi.2021.07.040. Epub ahead of print
- 30 Rhee C, Baker M, Vaidya V, *et al.* Incidence of Nosocomial COVID-19 in Patients Hospitalized at a Large US Academic Medical Center. *JAMA Netw Open* 2020;**3**:e2020498. doi:10.1001/jamanetworkopen.2020.20498
31. Public Health England. COVID-19: infection prevention and control (IPC). GOV.UK; Available: <https://www.gov.uk/government/publications/wuhan-novel-coronavirus-infection-prevention-and-control> [Published Jan 10, 2021; Accessed Mar 15, 2021].

1  
2  
3  
4  
5  
6  
7  
8  
9  
10  
11  
12  
13  
14  
15  
16  
17  
18  
19  
20  
21  
22  
23  
24  
25  
26  
27  
28  
29  
30  
31  
32  
33  
34  
35  
36  
37  
38  
39  
40  
41  
42  
43  
44  
45  
46  
47  
48  
49  
50  
51  
52  
53  
54  
55  
56  
57  
58  
59  
60



Distribution of laboratory confirmed SARS-CoV-2 cases over time. Daily incidence of new cases (beige), newly admitted cases (orange) and nosocomial acquisitions (green) over time.

1  
2  
3  
4  
5  
6  
7  
8  
9  
10  
11  
12  
13  
14  
15  
16  
17  
18  
19  
20  
21  
22  
23  
24  
25  
26  
27  
28  
29  
30  
31  
32  
33  
34  
35  
36  
37  
38  
39  
40  
41  
42  
43  
44  
45  
46  
47  
48  
49  
50  
51  
52  
53  
54  
55  
56  
57  
58  
59  
60

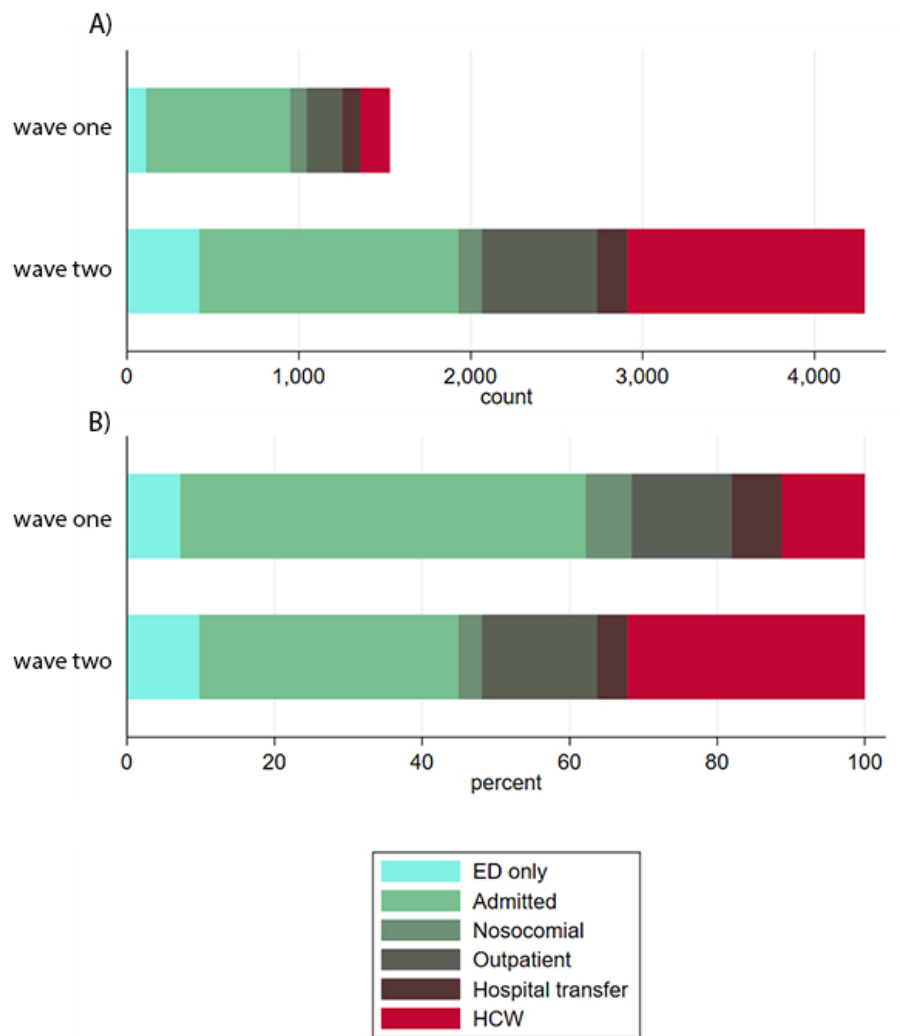

(A) Absolute number of cases within the different hospital cohorts during wave one (upper) and wave two (lower). (B) Proportion of cases within the different hospital cohorts during wave one (upper) and wave two (lower).

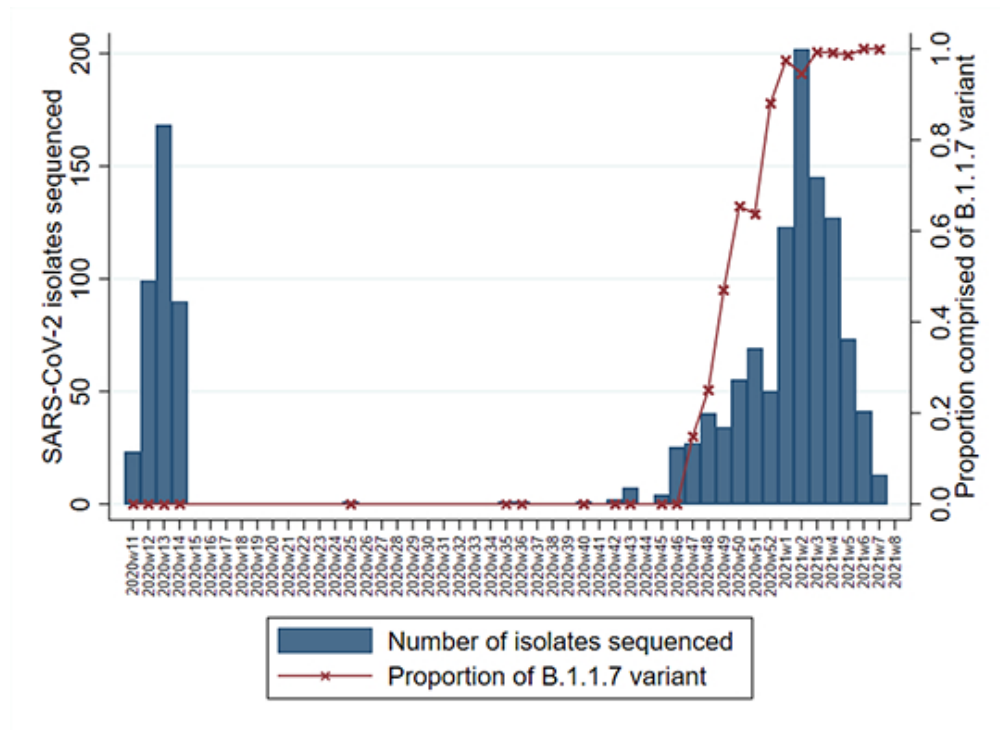

Number of cases with sequenced SARS-CoV-2 isolates by epi-week (bar) and the proportion of which were made up of the alpha variant B.1.1.7 (red line)

190x138mm (72 x 72 DPI)



## Supplementary Material

### Risk factors for severe disease from COVID-19 - literature review

| Risk factor               | References     | Comment on inclusion in multivariable model                                                                                                        |
|---------------------------|----------------|----------------------------------------------------------------------------------------------------------------------------------------------------|
| Age                       | [1–5]          | Included as a continuous variable.                                                                                                                 |
| Sex                       | [2,5]          | Included as binary variable.                                                                                                                       |
| Co-morbidities            |                |                                                                                                                                                    |
| 1. Cancer                 | 1. [2,3,5–7]   | 1. Included                                                                                                                                        |
| 2. Chronic kidney disease | 2. [2,4,6]     | 2. Included                                                                                                                                        |
| 3. Chronic lung disease   | 3. [2,3,5,6]   | 3. Included                                                                                                                                        |
| 4. Dementia               | 4. [5,6]       | 4. Poorly coded in our dataset so not included.                                                                                                    |
| 5. Diabetes               | 5. [2,3,6]     | 5. Included                                                                                                                                        |
| 6. Cardiac disease        | 6. [2,4–6]     | 6. Included                                                                                                                                        |
| 7. HIV                    | 7. [6,8]       | 7. Included                                                                                                                                        |
| 8. Immunocompromise       | 8. [2,6]       | 8. Poorly coded in our dataset so not included.                                                                                                    |
| 9. Liver disease          | 9. [2,5,6]     | 9. Poorly coded in our dataset so not included                                                                                                     |
| 10. Obesity               | 10. [4,6,9–11] | 10. Included                                                                                                                                       |
| 11. Pregnancy             | 11. [6,12]     | 11. Small number of pregnant individuals in our dataset so not included                                                                            |
| 12. Transplant            | 12. [2,6]      | 12. Included                                                                                                                                       |
| 13. Stroke                | 13. [2,6]      | 13. Included with cardiovascular disease                                                                                                           |
| 14. Frailty               | 14. [13–15]    |                                                                                                                                                    |
| Ethnicity                 | [2,5,16,17]    | Evidence suggests individuals of non-White ethnicities are at increased risk in multiple territories. Included as categorical variable.            |
| Socioeconomic background  | [18,19]        | These data suggest risk posed by certain ethnicity may be related to socioeconomic background. For simplicity we included only ethnicity variable. |
| Variant status            | [20–22]        | Alpha variant associated with increased mortality in population level studies, but not in single hospitalised study (full discussion in main text) |

## REFERENCES

- Richardson S, Hirsch JS, Narasimhan M, *et al.* Presenting Characteristics, Comorbidities, and Outcomes Among 5700 Patients Hospitalized With COVID-19 in the New York City Area. *JAMA* 2020;**323**:2052–9.
- Williamson EJ, Walker AJ, Bhaskaran K, *et al.* Factors associated with COVID-19-related death using OpenSAFELY. *Nature* 2020;**584**:430–6.
- Wu Z, McGoogan JM. Characteristics of and Important Lessons From the Coronavirus Disease 2019 (COVID-19) Outbreak in China: Summary of a Report of 72 314 Cases From the Chinese Center for Disease Control and Prevention. *JAMA* 2020;**323**:1239–42.
- Petrilli CM, Jones SA, Yang J, *et al.* Factors associated with hospital admission and critical illness among 5279 people with coronavirus disease 2019 in New York City: prospective cohort study. *BMJ* 2020;**369**:m1966.
- Harrison SL, Fazio-Eynullayeva E, Lane DA, *et al.* Comorbidities associated with mortality in 31,461 adults with COVID-19 in the United States: A federated electronic medical record analysis. *PLoS Med* 2020;**17**:e1003321.
- Know WYNT. People with Certain Medical Conditions. <https://www.cdc.gov/coronavirus/2019-ncov/need->

- 1  
2 extra-precautions/people-with-medical-conditions.html  
3
- 4 7 Dai M, Liu D, Liu M, *et al.* Patients with Cancer Appear More Vulnerable to SARS-CoV-2: A Multicenter  
5 Study during the COVID-19 Outbreak. *Cancer Discov* 2020;**10**:783–91.  
6
- 7 8 Geretti AM, Stockdale AJ, Kelly SH, *et al.* Outcomes of COVID-19 related hospitalization among people  
8 with HIV in the ISARIC WHO Clinical Characterization Protocol (UK): a prospective observational study.  
9 *Clin Infect Dis* Published Online First: 23 October 2020. doi:10.1093/cid/ciaa1605  
10
- 11 9 Lighter J, Phillips M, Hochman S, *et al.* Obesity in Patients Younger Than 60 Years Is a Risk Factor for  
12 COVID-19 Hospital Admission. *Clin Infect Dis* 2020;**71**:896–7.  
13
- 14 10 Tartof SY, Qian L, Hong V, *et al.* Obesity and Mortality Among Patients Diagnosed With COVID-19:  
15 Results From an Integrated Health Care Organization. *Ann Intern Med* 2020;**173**:773–81.  
16
- 17 11 Kompaniyets L, Goodman AB, Belay B, *et al.* Body Mass Index and Risk for COVID-19-Related  
18 Hospitalization, Intensive Care Unit Admission, Invasive Mechanical Ventilation, and Death - United  
19 States, March-December 2020. *MMWR Morb Mortal Wkly Rep* 2021;**70**:355–61.  
20
- 21 12 Allotey J, Stallings E, Bonet M, *et al.* Clinical manifestations, risk factors, and maternal and perinatal  
22 outcomes of coronavirus disease 2019 in pregnancy: living systematic review and meta-analysis. *BMJ*  
23 2020;**370**:m3320.  
24
- 25 13 Dumitrascu F, Branje KE, Hladkiewicz ES, *et al.* Association of frailty with outcomes in individuals with  
26 COVID-19: A living review and meta-analysis. *J Am Geriatr Soc* 2021;**69**:2419–29.  
27
- 28 14 Kastora S, Kounidas G, Perrott S, *et al.* Clinical frailty scale as a point of care prognostic indicator of  
29 mortality in COVID-19: a systematic review and meta-analysis. *EClinicalMedicine* 2021;**36**:100896.  
30
- 31 15 Yang Y, Luo K, Jiang Y, *et al.* The Impact of Frailty on COVID-19 Outcomes: A Systematic Review and  
32 Meta-analysis of 16 Cohort Studies. *J Nutr Health Aging* 2021;**25**:702–9.  
33
- 34 16 Price-Haywood EG, Burton J, Fort D, *et al.* Hospitalization and Mortality among Black Patients and White  
35 Patients with Covid-19. *N Engl J Med* 2020;**382**:2534–43.  
36
- 37 17 Gold JAW, Rossen LM, Ahmad FB, *et al.* Race, Ethnicity, and Age Trends in Persons Who Died from  
38 COVID-19 - United States, May-August 2020. *MMWR Morb Mortal Wkly Rep* 2020;**69**:1517–21.  
39
- 40 18 Kabarriti R, Brodin NP, Maron MI, *et al.* Association of Race and Ethnicity With Comorbidities and Survival  
41 Among Patients With COVID-19 at an Urban Medical Center in New York. *JAMA Netw Open*  
42 2020;**3**:e2019795.  
43
- 44 19 Muñoz-Price LS, Nattinger AB, Rivera F, *et al.* Racial Disparities in Incidence and Outcomes Among  
45 Patients With COVID-19. *JAMA Netw Open* 2020;**3**:e2021892.  
46
- 47 20 Davies NG, Jarvis CI, CMMID COVID-19 Working Group, *et al.* Increased mortality in community-tested  
48 cases of SARS-CoV-2 lineage B.1.1.7. *Nature* 2021;**593**:270–4.  
49
- 50 21 Frampton D, Rampling T, Cross A, *et al.* Genomic characteristics and clinical effect of the emergent  
51 SARS-CoV-2 B.1.1.7 lineage in London, UK: a whole-genome sequencing and hospital-based cohort  
52 study. *Lancet Infect Dis* Published Online First: 12 April 2021. doi:10.1016/S1473-3099(21)00170-5  
53
- 54 22 Challen R, Brooks-Pollock E, Read JM, *et al.* Risk of mortality in patients infected with SARS-CoV-2  
55 variant of concern 202012/1: matched cohort study. *BMJ* 2021;**372**:n579.  
56  
57  
58  
59  
60

1  
2  
3  
4  
5  
6  
7  
8  
9  
10  
11  
12  
13  
14  
15  
16  
17  
18  
19  
20  
21  
22  
23  
24  
25  
26  
27  
28  
29  
30  
31  
32  
33  
34  
35  
36  
37  
38  
39  
40  
41  
42  
43  
44  
45  
46  
47  
48  
49  
50  
51  
52  
53  
54  
55  
56  
57  
58  
59  
60



Our laboratory began testing on 13th March 2020 with initial capacity for around 150 PCR tests per day, before increasing to around 500 tests per day in late April during wave one, and up to 1000 tests per day during wave two

190x125mm (72 x 72 DPI)

## Appendix - List of COG-UK HOCl Investigators

### Barts site

| Name of individual                  | Employing Institution        | Role on HOCl study       |
|-------------------------------------|------------------------------|--------------------------|
| <b>Teresa Cutino-Moguel</b>         | <b>Barts Heath NHS Trust</b> | <b>PI Barts Health</b>   |
| Tabassum Khan                       | Barts Heath NHS Trust        | Research assistant       |
| Beatrix Kele                        | Barts Heath NHS Trust        | Sequencing scientist     |
| Raghavendran<br>Kulasegaran-Shylini | Barts Heath NHS Trust        | Sequencing scientist     |
| Claire E. Broad                     | Barts Heath NHS Trust        | Sequencing scientist     |
| Dola Owoyemi                        | Barts Heath NHS Trust        | Sequencing scientist     |
| David Harrington                    | Barts Heath NHS Trust        | Infection Control Doctor |
| Clare Coffey                        | Barts Heath NHS Trust        | Infection Control nurse  |
| Martina Cummins                     | Barts Heath NHS Trust        | Infection Control nurse  |
| Anna Riddell                        | Barts Heath NHS Trust        | Virology Consultant      |
| Tyrra D'Souza                       | Barts Heath NHS Trust        | Research Assistant       |

### Glasgow site

| Name of individual  | Employing Institution                                                                        | Role on HOCl study                             |
|---------------------|----------------------------------------------------------------------------------------------|------------------------------------------------|
| Guy Mollett         | MRC-University of Glasgow Centre for Virus Research                                          | Clinical Research Fellow                       |
| <b>Emma Thomson</b> | <b>MRC-University of Glasgow Centre for Virus Research and NHS Greater Glasgow and Clyde</b> | <b>Principal Investigator</b>                  |
| Christine Peters    | NHS Greater Glasgow and Clyde                                                                | Microbiology Consultant                        |
| Aleks Marek         | NHS Greater Glasgow and Clyde                                                                | Infection Control Lead/Microbiology Consultant |
| Rory Gunson         | NHS Greater Glasgow and Clyde                                                                | Virology laboratory lead                       |
| Emily Goldstein     | NHS Greater Glasgow and Clyde                                                                | Sample extraction                              |
| Emilie Shepherd     | NHS Greater Glasgow and Clyde                                                                | Sample extraction                              |
| James Shepherd      | MRC-University of Glasgow Centre for Virus Research                                          | Clinical Research Fellow                       |
| David Robertson     | MRC-University of Glasgow Centre for Virus Research                                          | Lead bioinformatician                          |
| Katherine Smollett  | MRC-University of Glasgow Centre for Virus Research                                          | Sequencing                                     |
| Ana da Silva Filipe | MRC-University of Glasgow Centre for Virus Research                                          | Sequencing                                     |
| Alice Broos         | MRC-University of Glasgow Centre for Virus Research                                          | Sequencing                                     |
| Stephen Carmichael  | MRC-University of Glasgow Centre for Virus Research                                          | Sequencing                                     |
| Nicholas Suarez     | MRC-University of Glasgow Centre for Virus Research                                          | Sequencing                                     |

|                      |                                                     |                   |
|----------------------|-----------------------------------------------------|-------------------|
| Chris Davis          | MRC-University of Glasgow Centre for Virus Research | Sample extraction |
| Sreenu Vattipally    | MRC-University of Glasgow Centre for Virus Research | Bioinformatician  |
| Joseph Hughes        | MRC-University of Glasgow Centre for Virus Research | Bioinformatician  |
| Ioulia Tsatsani      | MRC-University of Glasgow Centre for Virus Research | Bioinformatician  |
| Jacqueline McTaggart | NHS Greater Glasgow and Clyde                       | Research Nurse    |
| Stephanie McEnhill   | NHS Greater Glasgow and Clyde                       | Research Nurse    |

### Guy's and St Thomas' site

| Name of individual    | Employing Institution | Role on HOCl study                     |
|-----------------------|-----------------------|----------------------------------------|
| Adela Medina          | Viapath               | Sequence                               |
| Themoula Charalampous | KCL                   | Sequence                               |
| Bindi Patel           | GSTT NHS Trust        | Sequence                               |
| Flavia Flaviani       | GSTT NHS Trust        | Bioinformatics                         |
| Jörg Saßmannshausen   | GSTT NHS Trust        | Bioinformatics/IT                      |
| May Rabuya            | GSTT NHS Trust        | Research Nurse-data collection         |
| Sulekha Gurung        | GSTT NHS Trust        | Research Nurse-data collection         |
| Anu Augustine         | GSTT NHS Trust        | Research Nurse-data collection         |
| Rahul Batra           | GSTT NHS Trust        | Sequencing/IT/manager                  |
| Luke Snell            | GSTT NHS Trust        | Sequence, bioinf, data collection, IPC |
| <b>Gaia Nebbia</b>    | <b>GSTT NHS Trust</b> | <b>Principal Investigator</b>          |

### Imperial site

| Name of individual    | Employing Institution                | Role on HOCl study            |
|-----------------------|--------------------------------------|-------------------------------|
| <b>Alison Holmes</b>  | <b>Imperial Healthcare NHS Trust</b> | <b>Principal Investigator</b> |
| Sid Mookerjee         | Imperial Healthcare NHS Trust        | Data lead                     |
| James Price           | Imperial Healthcare NHS Trust        | Site IPC Lead                 |
| Paul Randell          | Imperial Healthcare NHS Trust        | Laboratory Lead               |
| Krystal Johnson       | Imperial Healthcare NHS Trust        | Research Nurse                |
| Thilipan Thaventhiran | Imperial Healthcare NHS Trust        | Research Nurse                |
| Damien Mine           | Imperial Healthcare NHS Trust        | Clinician                     |
| Sophie Hunter         | Imperial Healthcare NHS Trust        | Research Nurse                |
| Isa Ahmad             | Imperial Healthcare NHS Trust        | Data Analyst                  |
| Anitha Ramanathan     | Imperial Healthcare NHS Trust        | Research Nurse                |

### Liverpool site

| Name of individual | Employing Institution                 | Role on HOCl study                      |
|--------------------|---------------------------------------|-----------------------------------------|
| <b>Anu Chawla</b>  | <b>Liverpool NHS Foundation Trust</b> | <b>Principal Investigator</b>           |
| Alistair Derby     | University of Liverpool               | Sequencing lab lead                     |
| Sam Haldenby       | University of Liverpool               | Bioinformatics lead                     |
| Becky Taylor       | Liverpool NHS Foundation Trust        | Research data coordinator               |
| Keith Morris       | Liverpool NHS Foundation Trust        | Research nurse                          |
| Charles Numbere    | Liverpool NHS Foundation Trust        | Healthcare assistant                    |
| Mark Hopkins       | Liverpool NHS Foundation Trust        | Consultant clinical scientist           |
| Jenifer Mason      | Liverpool NHS Foundation Trust        | Consultant microbiologist               |
| Alexandra Bailey   | Liverpool NHS Foundation Trust        | Research administrator                  |
| Debbie Lankstead   | Liverpool NHS Foundation Trust        | Assistant Director of Infection Control |
| Damian Burns       | Liverpool NHS Foundation Trust        | Infection Control Nurse                 |

### Manchester site

| Name of individual     | Employing Institution | Role on HOCl study                                                                                                     |
|------------------------|-----------------------|------------------------------------------------------------------------------------------------------------------------|
| <b>Nicholas Machin</b> | <b>PHE and MFT</b>    | <b>Principal Investigator</b>                                                                                          |
| Shazaad Ahmad          | MFT                   | Consultant Virologist and IPC Doctor: review of sequencing reports                                                     |
| Julie Cawthorne        | MFT                   | Clinical Director of Infection Prevention and Control: review of sequencing reports and assistance with CRF completion |
| Ryan George            | MFT                   | IPC surveillance officer: co-ordination of metadata and sequencing reports                                             |
| James Montgomery       | MFT                   | IPC Nurse: review of sequencing reports and implementation of IPC actions                                              |
| Deborah McKew          | MFT                   | IPC Nurse: review of sequencing reports and implementation of IPC actions                                              |

### Newcastle site

| Name of individual      | Employing Institution      | Role on HOCl study            |
|-------------------------|----------------------------|-------------------------------|
| <b>Yusri Taha</b>       | <b>Newcastle NHS Trust</b> | <b>Site PI</b>                |
| Angela Cobb             | Newcastle NHS Trust        | IPC matron                    |
| Michelle Ramsay         | Newcastle NHS Trust        | Infection Control             |
| Maria Leader            | Newcastle NHS Trust        | Infection Control             |
| Shirelle Burton-Fanning | Newcastle NHS Trust        | Virologist                    |
| Julie Samuel            | Newcastle NHS Trust        | Microbiologist and IPC doctor |

|                 |                        |                          |
|-----------------|------------------------|--------------------------|
| Sarah Francis   | Newcastle NHS Trust    | Trial coordinator        |
| Lydia Taylor    | Newcastle NHS Trust    | Trial's Research Nurse   |
| Darren Smith    | Northumbria University | Lead, sequencing         |
| Matthew Bashton | Northumbria University | Bioinformatics lead      |
| Matthew Crown   | Northumbria University | Bioinformatics scientist |

### Nottingham site

| Name of individual   | Employing Institution       | Role on HOCl study                                             |
|----------------------|-----------------------------|----------------------------------------------------------------|
| <b>Nikunj Mahida</b> | <b>Nottingham NHS Trust</b> | <b>Principal Investigator</b>                                  |
| Matthew Loose        | University of Nottingham    | Sequencing/Bioinformatics                                      |
| Patrick McClure      | University of Nottingham    | Sequencing/Bioinformatics                                      |
| Mitch Clarke         | Nottingham NHS Trust        | IPC - IPC Lead - review of cases, sequencing data              |
| Elaine Baxter        | Nottingham NHS Trust        | IPC - Senior IPC team member, review of cases, sequencing data |
| Carl Yates           | Nottingham NHS Trust        | IPC - Senior IPC team member, review of cases, sequencing data |
| Irfan Aslam          | Nottingham NHS Trust        | Data Entry                                                     |
| Vicki Fleming        | Nottingham NHS Trust        | Sample collection and processing                               |
| Michelle Lister      | Nottingham NHS Trust        | Sample collection and processing                               |
| Johnny Debebe        | University of Nottingham    | Bioinformatics                                                 |
| Nadine Holmes        | University of Nottingham    | Sequencing                                                     |
| Christopher Moore    | University of Nottingham    | Sequencing                                                     |
| Matt Carlile         | University of Nottingham    | Sequencing                                                     |

### Royal Free site

| Name of individual     | Employing Institution              | Role on study                                                                     |
|------------------------|------------------------------------|-----------------------------------------------------------------------------------|
| <b>Tabitha Mahungu</b> | <b>Royal Free London NHS Trust</b> | <b>Principal Investigator</b>                                                     |
| Sophie Weller          | Royal Free London NHS Trust        | Sub-Investigator                                                                  |
| Tanzina Haque          | Royal Free London NHS Trust        | Sub-Investigator                                                                  |
| Jennifer Hart          | Royal Free London NHS Trust        | Sub-Investigator                                                                  |
| Dianne Irish-Tavares   | Royal Free London NHS Trust        | Sub-Investigator                                                                  |
| Eric Witele            | Royal Free London NHS Trust        | Clinical Research Nurse                                                           |
| Mia De Mesa            | Royal Free London NHS Trust        | Clinical Research Nurse                                                           |
| Vicky Pang             | Royal Free London NHS Trust        | Head of Infection Prevention & Control Nursing – provided IPC data for CRFs       |
| Jelena Heaphy          | Royal Free London NHS Trust        | Clinical Lead Nurse Infection Prevention and Control - provided IPC data for CRFs |

|                  |                            |                                                                 |
|------------------|----------------------------|-----------------------------------------------------------------|
| Wendy Chatterton | Health Services Laboratory | Virology Service Manager,<br>Organised samples & Logistics      |
| Monika Pusok     | Health Services Laboratory | Medical laboratory assistant ,<br>Organised samples & Logistics |

### Sandwell site

| Name of individual        | Employing Institution                                     | Role on HOCl study                                                       |
|---------------------------|-----------------------------------------------------------|--------------------------------------------------------------------------|
| <b>Dr Tranprit Saluja</b> | <b>Sandwell &amp; West Birmingham Hospitals NHS Trust</b> | <b>Principal Investigator - Consultant Microbiologist and IPC doctor</b> |
| Zahira Maqsood            | Sandwell NHS Trust                                        | Clinical Research Practitioner                                           |
| Angie Williams            | Sandwell NHS Trust                                        | Research Data Coordinators.                                              |
| Debbie Devonport          | Sandwell NHS Trust                                        | Research Data Coordinators.                                              |
| Lucy Palinkas             | Sandwell NHS Trust                                        | Infection control Data Analyst                                           |
| Diane Thomlinson          | Sandwell NHS Trust                                        | Infection control Nurse                                                  |
| Julie Booth               | Sandwell NHS Trust                                        | Lead Nurse IPC                                                           |
| Ashok Dadrah              | Sandwell NHS Trust                                        | Laboratory Services Manager                                              |
| Amanda Symonds            | Sandwell NHS Trust                                        | Senior Biomedical Scientist (Microbiology)                               |
| Cassandra Craig           | Sandwell NHS Trust                                        | Laboratory Associate Practitioner                                        |
| Dr Abhinav Kumar          | Sandwell NHS Trust                                        | Consultant microbiologist                                                |

### Sheffield site

| Name of individual      | Employing Institution          | Role on HOCl study                   |
|-------------------------|--------------------------------|--------------------------------------|
| <b>Thushan de Silva</b> | <b>University of Sheffield</b> | <b>Principal Investigator</b>        |
| Matthew D Parker        | University of Sheffield        | Bioinformatics processing/management |
| Peijun Zhang            | University of Sheffield        | WGS                                  |
| Max Whiteley            | University of Sheffield        | WGS                                  |
| Benjamin B Lindsey      | University of Sheffield        | WGS                                  |
| Paige Wolverson         | University of Sheffield        | WGS                                  |
| Benjamin H Foulkes      | University of Sheffield        | WGS                                  |
| Luke Green              | University of Sheffield        | WGS                                  |
| Marta Gallis Ramalho    | University of Sheffield        | WGS                                  |
| Stavroula F Louka       | University of Sheffield        | WGS                                  |
| Adrienn Angyal          | University of Sheffield        | WGS                                  |
| Nikki Smith             | University of Sheffield        | Management/admin                     |
| David G Partridge       | Sheffield NHS Trust            | Investigator                         |
| Cariad Evans            | Sheffield NHS Trust            | Investigator                         |
| Mohammad Raza           | Sheffield NHS Trust            | Investigator                         |
| Hayley Colton           | Sheffield NHS Trust            | Investigator                         |



|                     |                         |                                  |
|---------------------|-------------------------|----------------------------------|
| Rebecca Gregory     | Sheffield NHS Trust     | Clinical trial assistant         |
| Phillip Ravencroft  | Sheffield NHS Trust     | Clinical trial assistant         |
| Katie Johnson       | Sheffield NHS Trust     | Sample collection and processing |
| Sharon Hsu          | University of Sheffield | Bioinformatics support           |
| Alexander J Keeley  | Sheffield NHS Trust     |                                  |
| Alison Cope         | Sheffield NHS Trust     |                                  |
| Amy State           | Sheffield NHS Trust     | Sample collection and processing |
| Nasar Ali           | Sheffield NHS Trust     |                                  |
| Rasha Raghei        | Sheffield NHS Trust     |                                  |
| Joe Heffer          | Sheffield NHS Trust     |                                  |
| Stella Christou     | University of Sheffield | WGS                              |
| Samantha E Hansford | University of Sheffield | Management/admin                 |
| Hailey R Hornsby    | University of Sheffield | WGS                              |
| Phil Wade           | Sheffield NHS Trust     | Data collection                  |
| Kay Cawthron        | Sheffield NHS Trust     | Data collection                  |
| Maqsood Khan        | Sheffield NHS Trust     | Data collection                  |
| Amber Ford          | Sheffield NHS Trust     | Data input                       |
| Imogen Wilson       | Sheffield NHS Trust     | Data input                       |
| Kate Harrington     | Sheffield NHS Trust     | Sample collection                |
| Nic Tinker          | Sheffield NHS Trust     | Sample collection                |
| Sally Nyinza        | Sheffield NHS Trust     | Investigator                     |

### Southampton site

| Name of individual   | Employing Institution         | Role on study                 |
|----------------------|-------------------------------|-------------------------------|
| <b>Kordo Saeed</b>   | <b>Southampton NHS Trust</b>  | <b>Principal Investigator</b> |
| Jacqui Prieto        | Southampton NHS Trust         | Samples/logistics             |
| Adhyana Mahanama     | Southampton NHS Trust         | Samples/logistics             |
| Buddhini Samaraweera | Southampton NHS Trust         | Samples/logistics             |
| Siona Silveira       | Southampton NHS Trust         | Samples/logistics             |
| Emanuela Pelosi      | Southampton NHS Trust         | Samples/logistics             |
| Eleri Wilson-Davies  | Southampton NHS Trust         | Samples/logistics             |
| Sarah Jeremiah       | Southampton NHS Trust         | Data collection               |
| Helen Wheeler        | Southampton NHS Trust         | Data collection               |
| Matthew Harvey       | Southampton NHS Trust         | Data collection               |
| Thea Sass            | Southampton NHS Trust         | Data collection               |
| Helen Umpleby        | Southampton NHS Trust         | Data collection               |
| Stephen Aplin        | Southampton NHS Trust         | Data collection               |
| Samuel Robson        | Portsmouth University         | Sequencing lead               |
| Sharon Glaysher      | Portsmouth Hospital NHS Trust | Sequencing                    |
| Scott Elliott        | Portsmouth Hospital NHS Trust | Sequencing                    |
| Kate Cook            | Portsmouth University         | Sequencing                    |
| Christopher Fearn    | Portsmouth University         | Sequencing                    |
| Salman Goudarzi      | Portsmouth University         | Sequencing                    |
| Katie Loveson        | Portsmouth University         | Sequencing                    |

**St George's site**

| Name of individual      | Employing Institution                           | Role on HOCl study                                             |
|-------------------------|-------------------------------------------------|----------------------------------------------------------------|
| Kenneth Laing           | St Georges, UoL                                 | Sequencing                                                     |
| Irene Monahan           | St Georges, UoL                                 | Sequencing                                                     |
| Adam Witney             | St Georges, UoL                                 | Bioinformatician                                               |
| Joshua Taylor           | St Georges NHS Trust                            | Virology, data collection, CRF completion and upload to MACRO  |
| NgeeKeong Tan           | St Georges NHS Trust                            | Virology, data collection, CRF completion and upload to MACRO  |
| <b>Cassie Pope</b>      | <b>St Georges NHS Trust and St Georges, UoL</b> | <b>PI, data collection, CRF completion and upload to Macro</b> |
| Claudia Cardosa Pereira | St Georges NHS Trust                            | IPC nurse                                                      |
| Vaz Malik               | St Georges, UoL                                 | Upload to macro                                                |

**UCLH site**

| Name of individual   | Employing Institution | Role on HOCl study                        |
|----------------------|-----------------------|-------------------------------------------|
| <b>Gee Yen Shin</b>  | <b>UCLH NHS Trust</b> | <b>Principal Investigator, virologist</b> |
| Eleni Nastouli       | UCLH NHS Trust        | Virologist                                |
| Catherine Houlihan   | UCLH NHS Trust        | Virologist                                |
| Judith Heaney        | UCLH NHS Trust        | Clinical scientist                        |
| Matt Byott           | UCLH NHS Trust        | Bioinformatician                          |
| Dan Frampton         | UCL / UCLH            | Bioinformatician                          |
| Gema Martinez-Garcia | UCLH NHS Trust        | Senior infection control nurse            |
| Leila Hail           | UCLH NHS Trust        | Senior infection control nurse            |
| Ndifreke Atang       | UCLH NHS Trust        | Clinical trials practitioner              |
| Helen Francis        | UCLH NHS Trust        | Research nurse                            |
| Milica Rajkov        | UCLH NHS Trust        | Clinical trials co-ordinator              |

**UCL Genomics**

| Name of individual   | Employing Institution | Role on HOCl study        |
|----------------------|-----------------------|---------------------------|
| <b>Judith Breuer</b> | <b>UCL</b>            | <b>Chief Investigator</b> |
| Rachel Williams      | UCL                   | Sequencing                |
| Sunando Roy          | UCL                   | Sequencing                |
| Charlotte Williams   | UCL                   | Sequencing                |
| Nadua Bayzid         | UCL                   | Sequencing                |
| Marius Cotic         | UCL                   | Sequencing                |

**UCL Comprehensive Clinical Trials Unit**

| Name of individual | Employing Institution | Role on HOCl study |
|--------------------|-----------------------|--------------------|
| James Blackstone   | UCL                   | Project Manager    |
| Leanne Hockey      | UCL                   | Trial Manager      |

|                 |     |                  |
|-----------------|-----|------------------|
| Alyson MacNeil  | UCL | Trial Manager    |
| Rachel McComish | UCL | Data Analyst     |
| Monica Panca    | UCL | Health Economist |
| Georgia Marley  | UCL | Data Manager     |

#### UCL Institute for Global Health

| Name of individual | Employing Institution | Role on HOCl study     |
|--------------------|-----------------------|------------------------|
| Andrew Copas       | UCL                   | Senior Statistician    |
| Oliver Stirrup     | UCL                   | Statistician           |
| Fiona Mapp         | UCL                   | Qualitative Researcher |

#### UCL Research IT Services

| Name of individual | Employing Institution | Role on HOCl study |
|--------------------|-----------------------|--------------------|
| Alif Tamuri        | UCL                   | IT Developer       |
| Stefan Piatek      | UCL                   | IT Developer       |

#### University of Strathclyde

| Name of individual | Employing Institution | Role on HOCl study            |
|--------------------|-----------------------|-------------------------------|
| Paul Flowers       | UoS                   | Senior Qualitative Researcher |

#### Francis Crick Institute

| Name of individual  | Employing Institution   | Role on HOCl study           |
|---------------------|-------------------------|------------------------------|
| Marg Crawford       | Francis Crick Institute | Sample processing/sequencing |
| Laura Cubitt        | Francis Crick Institute | Sample processing/sequencing |
| Deborah J Jackson   | Francis Crick Institute | Sample processing/sequencing |
| Jimena Perez-Lloret | Francis Crick Institute | Sample processing/sequencing |
| Sophie Ward         | Francis Crick Institute | Sample processing/sequencing |
| Makis Fidanis       | Francis Crick Institute | Sample processing/sequencing |
| Aaron Sait          | Francis Crick Institute | Sample processing/sequencing |
| Robert Goldstone    | Francis Crick Institute | Data Processing              |
| Harshil Patel       | Francis Crick Institute | Data Processing              |
| Chelsea Sawyer      | Francis Crick Institute | Data Processing              |
| Aengus Stewart      | Francis Crick Institute | Data Processing              |
| Steve Gamblin       | Francis Crick Institute | Methodology/Supervision      |
| Charles Swanton     | Francis Crick Institute | Methodology/Supervision      |
| Jerome Nicod        | Francis Crick Institute | Methodology/Supervision      |

**STROBE 2007 (v4) Statement—Checklist of items that should be included in reports of *cohort studies***

| Section/Topic                | Item # | Recommendation                                                                                                                                                                       | Reported on page # |
|------------------------------|--------|--------------------------------------------------------------------------------------------------------------------------------------------------------------------------------------|--------------------|
| <b>Title and abstract</b>    | 1      | (a) Indicate the study's design with a commonly used term in the title or the abstract                                                                                               | 2                  |
|                              |        | (b) Provide in the abstract an informative and balanced summary of what was done and what was found                                                                                  | 2                  |
| <b>Introduction</b>          |        |                                                                                                                                                                                      |                    |
| Background/rationale         | 2      | Explain the scientific background and rationale for the investigation being reported                                                                                                 | 6                  |
| Objectives                   | 3      | State specific objectives, including any prespecified hypotheses                                                                                                                     | 6                  |
| <b>Methods</b>               |        |                                                                                                                                                                                      |                    |
| Study design                 | 4      | Present key elements of study design early in the paper                                                                                                                              | 7-9                |
| Setting                      | 5      | Describe the setting, locations, and relevant dates, including periods of recruitment, exposure, follow-up, and data collection                                                      | 7-9                |
| Participants                 | 6      | (a) Give the eligibility criteria, and the sources and methods of selection of participants. Describe methods of follow-up                                                           | 8                  |
|                              |        | (b) For matched studies, give matching criteria and number of exposed and unexposed                                                                                                  | NA                 |
| Variables                    | 7      | Clearly define all outcomes, exposures, predictors, potential confounders, and effect modifiers. Give diagnostic criteria, if applicable                                             | 7-9                |
| Data sources/<br>measurement | 8*     | For each variable of interest, give sources of data and details of methods of assessment (measurement). Describe comparability of assessment methods if there is more than one group | 8-9                |
| Bias                         | 9      | Describe any efforts to address potential sources of bias                                                                                                                            | 15                 |
| Study size                   | 10     | Explain how the study size was arrived at                                                                                                                                            | 12                 |
| Quantitative variables       | 11     | Explain how quantitative variables were handled in the analyses. If applicable, describe which groupings were chosen and why                                                         | 8-9                |
| Statistical methods          | 12     | (a) Describe all statistical methods, including those used to control for confounding                                                                                                | 9-10               |
|                              |        | (b) Describe any methods used to examine subgroups and interactions                                                                                                                  | NA                 |
|                              |        | (c) Explain how missing data were addressed                                                                                                                                          | 9                  |
|                              |        | (d) If applicable, explain how loss to follow-up was addressed                                                                                                                       | NA                 |
|                              |        | (e) Describe any sensitivity analyses                                                                                                                                                | NA                 |
| <b>Results</b>               |        |                                                                                                                                                                                      |                    |

|                          |     |                                                                                                                                                                                                              |                             |
|--------------------------|-----|--------------------------------------------------------------------------------------------------------------------------------------------------------------------------------------------------------------|-----------------------------|
| Participants             | 13* | (a) Report numbers of individuals at each stage of study—eg numbers potentially eligible, examined for eligibility, confirmed eligible, included in the study, completing follow-up, and analysed            | 10-12                       |
|                          |     | (b) Give reasons for non-participation at each stage                                                                                                                                                         | 15                          |
|                          |     | (c) Consider use of a flow diagram                                                                                                                                                                           | Not done                    |
| Descriptive data         | 14* | (a) Give characteristics of study participants (eg demographic, clinical, social) and information on exposures and potential confounders                                                                     | 15-18                       |
|                          |     | (b) Indicate number of participants with missing data for each variable of interest                                                                                                                          | In tables                   |
|                          |     | (c) Summarise follow-up time (eg, average and total amount)                                                                                                                                                  | NA                          |
| Outcome data             | 15* | Report numbers of outcome events or summary measures over time                                                                                                                                               | Page 18<br>Table 1, Table 2 |
| Main results             | 16  | (a) Give unadjusted estimates and, if applicable, confounder-adjusted estimates and their precision (eg, 95% confidence interval). Make clear which confounders were adjusted for and why they were included | 12-18<br>Table 1,2          |
|                          |     | (b) Report category boundaries when continuous variables were categorized                                                                                                                                    | NA                          |
|                          |     | (c) If relevant, consider translating estimates of relative risk into absolute risk for a meaningful time period                                                                                             | NA                          |
| Other analyses           | 17  | Report other analyses done—eg analyses of subgroups and interactions, and sensitivity analyses                                                                                                               | None performed              |
| <b>Discussion</b>        |     |                                                                                                                                                                                                              |                             |
| Key results              | 18  | Summarise key results with reference to study objectives                                                                                                                                                     | 22                          |
| <b>Limitations</b>       |     |                                                                                                                                                                                                              |                             |
| Interpretation           | 20  | Give a cautious overall interpretation of results considering objectives, limitations, multiplicity of analyses, results from similar studies, and other relevant evidence                                   | 22-23                       |
| Generalisability         | 21  | Discuss the generalisability (external validity) of the study results                                                                                                                                        | 23                          |
| <b>Other information</b> |     |                                                                                                                                                                                                              |                             |
| Funding                  | 22  | Give the source of funding and the role of the funders for the present study and, if applicable, for the original study on which the present article is based                                                | 4                           |

\*Give information separately for cases and controls in case-control studies and, if applicable, for exposed and unexposed groups in cohort and cross-sectional studies.

**Note:** An Explanation and Elaboration article discusses each checklist item and gives methodological background and published examples of transparent reporting. The STROBE checklist is best used in conjunction with this article (freely available on the Web sites of PLoS Medicine at <http://www.plosmedicine.org/>, Annals of Internal Medicine at <http://www.annals.org/>, and Epidemiology at <http://www.epidem.com/>). Information on the STROBE Initiative is available at [www.strobe-statement.org](http://www.strobe-statement.org).
