# Supplementary material for: Descriptive comparison of admission characteristics between pandemic waves and multivariable analysis of the association of the Alpha variant (B.1.1.7 lineage) of SARS-CoV-2 with disease severity in inner London
Source: PubMed Central journal article supplement (PMC8829842; doi:10.1136/bmjopen-2021-055474), 2022-02-08

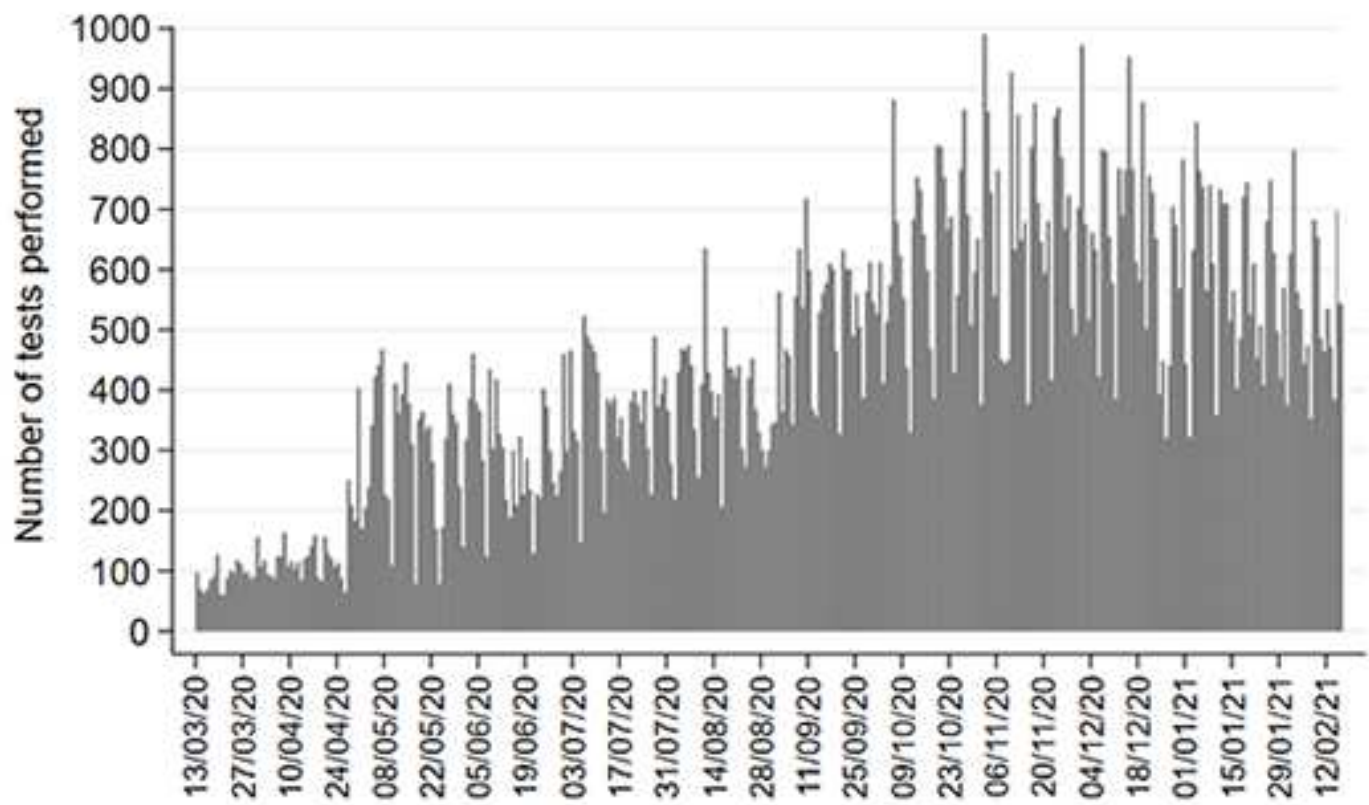

Supplement: bmjopen-2021-055474supp001.pdf [file bmjopen-2021-055474supp001.pdf]
