# Supplementary material for: Descriptive comparison of admission characteristics between pandemic waves and multivariable analysis of the association of the Alpha variant (B.1.1.7 lineage) of SARS-CoV-2 with disease severity in inner London
Source: PubMed Central journal article supplement (PMC8829842; doi:10.1136/bmjopen-2021-055474), 2022-02-08
Supplement: bmjopen-2021-055474supp003.pdf [file bmjopen-2021-055474supp003.pdf]

## Appendix - List of COG-UK HOCl Investigators

### Barts site

| Name of individual                  | Employing Institution        | Role on HOCl study       |
|-------------------------------------|------------------------------|--------------------------|
| <b>Teresa Cutino-Moguel</b>         | <b>Barts Heath NHS Trust</b> | <b>PI Barts Health</b>   |
| Tabassum Khan                       | Barts Heath NHS Trust        | Research assistant       |
| Beatrix Kele                        | Barts Heath NHS Trust        | Sequencing scientist     |
| Raghavendran<br>Kulasegaran-Shylini | Barts Heath NHS Trust        | Sequencing scientist     |
| Claire E. Broad                     | Barts Heath NHS Trust        | Sequencing scientist     |
| Dola Owoyemi                        | Barts Heath NHS Trust        | Sequencing scientist     |
| David Harrington                    | Barts Heath NHS Trust        | Infection Control Doctor |
| Clare Coffey                        | Barts Heath NHS Trust        | Infection Control nurse  |
| Martina Cummins                     | Barts Heath NHS Trust        | Infection Control nurse  |
| Anna Riddell                        | Barts Heath NHS Trust        | Virology Consultant      |
| Tyrra D'Souza                       | Barts Heath NHS Trust        | Research Assistant       |

### Glasgow site

| Name of individual  | Employing Institution                                                                        | Role on HOCl study                             |
|---------------------|----------------------------------------------------------------------------------------------|------------------------------------------------|
| Guy Mollett         | MRC-University of Glasgow Centre for Virus Research                                          | Clinical Research Fellow                       |
| <b>Emma Thomson</b> | <b>MRC-University of Glasgow Centre for Virus Research and NHS Greater Glasgow and Clyde</b> | <b>Principal Investigator</b>                  |
| Christine Peters    | NHS Greater Glasgow and Clyde                                                                | Microbiology Consultant                        |
| Aleks Marek         | NHS Greater Glasgow and Clyde                                                                | Infection Control Lead/Microbiology Consultant |
| Rory Gunson         | NHS Greater Glasgow and Clyde                                                                | Virology laboratory lead                       |
| Emily Goldstein     | NHS Greater Glasgow and Clyde                                                                | Sample extraction                              |
| Emilie Shepherd     | NHS Greater Glasgow and Clyde                                                                | Sample extraction                              |
| James Shepherd      | MRC-University of Glasgow Centre for Virus Research                                          | Clinical Research Fellow                       |
| David Robertson     | MRC-University of Glasgow Centre for Virus Research                                          | Lead bioinformatician                          |
| Katherine Smollett  | MRC-University of Glasgow Centre for Virus Research                                          | Sequencing                                     |
| Ana da Silva Filipe | MRC-University of Glasgow Centre for Virus Research                                          | Sequencing                                     |
| Alice Broos         | MRC-University of Glasgow Centre for Virus Research                                          | Sequencing                                     |
| Stephen Carmichael  | MRC-University of Glasgow Centre for Virus Research                                          | Sequencing                                     |
| Nicholas Suarez     | MRC-University of Glasgow Centre for Virus Research                                          | Sequencing                                     |

|                      |                                                     |                   |
|----------------------|-----------------------------------------------------|-------------------|
| Chris Davis          | MRC-University of Glasgow Centre for Virus Research | Sample extraction |
| Sreenu Vattipally    | MRC-University of Glasgow Centre for Virus Research | Bioinformatician  |
| Joseph Hughes        | MRC-University of Glasgow Centre for Virus Research | Bioinformatician  |
| Ioulia Tsatsani      | MRC-University of Glasgow Centre for Virus Research | Bioinformatician  |
| Jacqueline McTaggart | NHS Greater Glasgow and Clyde                       | Research Nurse    |
| Stephanie McEnhill   | NHS Greater Glasgow and Clyde                       | Research Nurse    |

#### Guy's and St Thomas' site

| Name of individual    | Employing Institution | Role on HOCl study                     |
|-----------------------|-----------------------|----------------------------------------|
| Adela Medina          | Viapath               | Sequence                               |
| Themoula Charalampous | KCL                   | Sequence                               |
| Bindi Patel           | GSTT NHS Trust        | Sequence                               |
| Flavia Flaviani       | GSTT NHS Trust        | Bioinformatics                         |
| Jörg Saßmannshausen   | GSTT NHS Trust        | Bioinformatics/IT                      |
| May Rabuya            | GSTT NHS Trust        | Research Nurse-data collection         |
| Sulekha Gurung        | GSTT NHS Trust        | Research Nurse-data collection         |
| Anu Augustine         | GSTT NHS Trust        | Research Nurse-data collection         |
| Rahul Batra           | GSTT NHS Trust        | Sequencing/IT/manager                  |
| Luke Snell            | GSTT NHS Trust        | Sequence, bioinf, data collection, IPC |
| <b>Gaia Nebbia</b>    | <b>GSTT NHS Trust</b> | <b>Principal Investigator</b>          |

#### Imperial site

| Name of individual    | Employing Institution                | Role on HOCl study            |
|-----------------------|--------------------------------------|-------------------------------|
| <b>Alison Holmes</b>  | <b>Imperial Healthcare NHS Trust</b> | <b>Principal Investigator</b> |
| Sid Mookerjee         | Imperial Healthcare NHS Trust        | Data lead                     |
| James Price           | Imperial Healthcare NHS Trust        | Site IPC Lead                 |
| Paul Randell          | Imperial Healthcare NHS Trust        | Laboratory Lead               |
| Krystal Johnson       | Imperial Healthcare NHS Trust        | Research Nurse                |
| Thilipan Thaventhiran | Imperial Healthcare NHS Trust        | Research Nurse                |
| Damien Mine           | Imperial Healthcare NHS Trust        | Clinician                     |
| Sophie Hunter         | Imperial Healthcare NHS Trust        | Research Nurse                |
| Isa Ahmad             | Imperial Healthcare NHS Trust        | Data Analyst                  |
| Anitha Ramanathan     | Imperial Healthcare NHS Trust        | Research Nurse                |

**Liverpool site**

| Name of individual | Employing Institution                 | Role on HOCl study                      |
|--------------------|---------------------------------------|-----------------------------------------|
| <b>Anu Chawla</b>  | <b>Liverpool NHS Foundation Trust</b> | <b>Principal Investigator</b>           |
| Alistair Derby     | University of Liverpool               | Sequencing lab lead                     |
| Sam Haldenby       | University of Liverpool               | Bioinformatics lead                     |
| Becky Taylor       | Liverpool NHS Foundation Trust        | Research data coordinator               |
| Keith Morris       | Liverpool NHS Foundation Trust        | Research nurse                          |
| Charles Numbere    | Liverpool NHS Foundation Trust        | Healthcare assistant                    |
| Mark Hopkins       | Liverpool NHS Foundation Trust        | Consultant clinical scientist           |
| Jenifer Mason      | Liverpool NHS Foundation Trust        | Consultant microbiologist               |
| Alexandra Bailey   | Liverpool NHS Foundation Trust        | Research administrator                  |
| Debbie Lankstead   | Liverpool NHS Foundation Trust        | Assistant Director of Infection Control |
| Damian Burns       | Liverpool NHS Foundation Trust        | Infection Control Nurse                 |

**Manchester site**

| Name of individual     | Employing Institution | Role on HOCl study                                                                                                     |
|------------------------|-----------------------|------------------------------------------------------------------------------------------------------------------------|
| <b>Nicholas Machin</b> | <b>PHE and MFT</b>    | <b>Principal Investigator</b>                                                                                          |
| Shazaad Ahmad          | MFT                   | Consultant Virologist and IPC Doctor: review of sequencing reports                                                     |
| Julie Cawthorne        | MFT                   | Clinical Director of Infection Prevention and Control: review of sequencing reports and assistance with CRF completion |
| Ryan George            | MFT                   | IPC surveillance officer: co-ordination of metadata and sequencing reports                                             |
| James Montgomery       | MFT                   | IPC Nurse: review of sequencing reports and implementation of IPC actions                                              |
| Deborah McKew          | MFT                   | IPC Nurse: review of sequencing reports and implementation of IPC actions                                              |

**Newcastle site**

| Name of individual      | Employing Institution      | Role on HOCl study            |
|-------------------------|----------------------------|-------------------------------|
| <b>Yusri Taha</b>       | <b>Newcastle NHS Trust</b> | <b>Site PI</b>                |
| Angela Cobb             | Newcastle NHS Trust        | IPC matron                    |
| Michelle Ramsay         | Newcastle NHS Trust        | Infection Control             |
| Maria Leader            | Newcastle NHS Trust        | Infection Control             |
| Shirelle Burton-Fanning | Newcastle NHS Trust        | Virologist                    |
| Julie Samuel            | Newcastle NHS Trust        | Microbiologist and IPC doctor |

|                 |                        |                          |
|-----------------|------------------------|--------------------------|
| Sarah Francis   | Newcastle NHS Trust    | Trial coordinator        |
| Lydia Taylor    | Newcastle NHS Trust    | Trial's Research Nurse   |
| Darren Smith    | Northumbria University | Lead, sequencing         |
| Matthew Bashton | Northumbria University | Bioinformatics lead      |
| Matthew Crown   | Northumbria University | Bioinformatics scientist |

### Nottingham site

| Name of individual   | Employing Institution       | Role on HOCl study                                             |
|----------------------|-----------------------------|----------------------------------------------------------------|
| <b>Nikunj Mahida</b> | <b>Nottingham NHS Trust</b> | <b>Principal Investigator</b>                                  |
| Matthew Loose        | University of Nottingham    | Sequencing/Bioinformatics                                      |
| Patrick McClure      | University of Nottingham    | Sequencing/Bioinformatics                                      |
| Mitch Clarke         | Nottingham NHS Trust        | IPC - IPC Lead - review of cases, sequencing data              |
| Elaine Baxter        | Nottingham NHS Trust        | IPC - Senior IPC team member, review of cases, sequencing data |
| Carl Yates           | Nottingham NHS Trust        | IPC - Senior IPC team member, review of cases, sequencing data |
| Irfan Aslam          | Nottingham NHS Trust        | Data Entry                                                     |
| Vicki Fleming        | Nottingham NHS Trust        | Sample collection and processing                               |
| Michelle Lister      | Nottingham NHS Trust        | Sample collection and processing                               |
| Johnny Debebe        | University of Nottingham    | Bioinformatics                                                 |
| Nadine Holmes        | University of Nottingham    | Sequencing                                                     |
| Christopher Moore    | University of Nottingham    | Sequencing                                                     |
| Matt Carlile         | University of Nottingham    | Sequencing                                                     |

### Royal Free site

| Name of individual     | Employing Institution              | Role on study                                                                     |
|------------------------|------------------------------------|-----------------------------------------------------------------------------------|
| <b>Tabitha Mahungu</b> | <b>Royal Free London NHS Trust</b> | <b>Principal Investigator</b>                                                     |
| Sophie Weller          | Royal Free London NHS Trust        | Sub-Investigator                                                                  |
| Tanzina Haque          | Royal Free London NHS Trust        | Sub-Investigator                                                                  |
| Jennifer Hart          | Royal Free London NHS Trust        | Sub-Investigator                                                                  |
| Dianne Irish-Tavares   | Royal Free London NHS Trust        | Sub-Investigator                                                                  |
| Eric Witele            | Royal Free London NHS Trust        | Clinical Research Nurse                                                           |
| Mia De Mesa            | Royal Free London NHS Trust        | Clinical Research Nurse                                                           |
| Vicky Pang             | Royal Free London NHS Trust        | Head of Infection Prevention & Control Nursing – provided IPC data for CRFs       |
| Jelena Heaphy          | Royal Free London NHS Trust        | Clinical Lead Nurse Infection Prevention and Control - provided IPC data for CRFs |

|                  |                            |                                                                 |
|------------------|----------------------------|-----------------------------------------------------------------|
| Wendy Chatterton | Health Services Laboratory | Virology Service Manager,<br>Organised samples & Logistics      |
| Monika Pusok     | Health Services Laboratory | Medical laboratory assistant ,<br>Organised samples & Logistics |

**Sandwell site**

| Name of individual         | Employing Institution                                     | Role on HOCl study                                                       |
|----------------------------|-----------------------------------------------------------|--------------------------------------------------------------------------|
| <b>Dr Tranpriti Saluja</b> | <b>Sandwell &amp; West Birmingham Hospitals NHS Trust</b> | <b>Principal Investigator - Consultant Microbiologist and IPC doctor</b> |
| Zahira Maqsood             | Sandwell NHS Trust                                        | Clinical Research Practitioner                                           |
| Angie Williams             | Sandwell NHS Trust                                        | Research Data Coordinators.                                              |
| Debbie Devonport           | Sandwell NHS Trust                                        | Research Data Coordinators.                                              |
| Lucy Palinkas              | Sandwell NHS Trust                                        | Infection control Data Analyst                                           |
| Diane Thomlinson           | Sandwell NHS Trust                                        | Infection control Nurse                                                  |
| Julie Booth                | Sandwell NHS Trust                                        | Lead Nurse IPC                                                           |
| Ashok Dadrah               | Sandwell NHS Trust                                        | Laboratory Services Manager                                              |
| Amanda Symonds             | Sandwell NHS Trust                                        | Senior Biomedical Scientist (Microbiology)                               |
| Cassandra Craig            | Sandwell NHS Trust                                        | Laboratory Associate Practitioner                                        |
| Dr Abhinav Kumar           | Sandwell NHS Trust                                        | Consultant microbiologist                                                |

**Sheffield site**

| Name of individual      | Employing Institution          | Role on HOCl study                   |
|-------------------------|--------------------------------|--------------------------------------|
| <b>Thushan de Silva</b> | <b>University of Sheffield</b> | <b>Principal Investigator</b>        |
| Matthew D Parker        | University of Sheffield        | Bioinformatics processing/management |
| Peijun Zhang            | University of Sheffield        | WGS                                  |
| Max Whiteley            | University of Sheffield        | WGS                                  |
| Benjamin B Lindsey      | University of Sheffield        | WGS                                  |
| Paige Wolverson         | University of Sheffield        | WGS                                  |
| Benjamin H Foulkes      | University of Sheffield        | WGS                                  |
| Luke Green              | University of Sheffield        | WGS                                  |
| Marta Gallis Ramalho    | University of Sheffield        | WGS                                  |
| Stavroula F Louka       | University of Sheffield        | WGS                                  |
| Adrienn Angyal          | University of Sheffield        | WGS                                  |
| Nikki Smith             | University of Sheffield        | Management/admin                     |
| David G Partridge       | Sheffield NHS Trust            | Investigator                         |
| Cariad Evans            | Sheffield NHS Trust            | Investigator                         |
| Mohammad Raza           | Sheffield NHS Trust            | Investigator                         |
| Hayley Colton           | Sheffield NHS Trust            | Investigator                         |

|                     |                         |                                  |
|---------------------|-------------------------|----------------------------------|
| Rebecca Gregory     | Sheffield NHS Trust     | Clinical trial assistant         |
| Phillip Ravencroft  | Sheffield NHS Trust     | Clinical trial assistant         |
| Katie Johnson       | Sheffield NHS Trust     | Sample collection and processing |
| Sharon Hsu          | University of Sheffield | Bioinformatics support           |
| Alexander J Keeley  | Sheffield NHS Trust     |                                  |
| Alison Cope         | Sheffield NHS Trust     |                                  |
| Amy State           | Sheffield NHS Trust     | Sample collection and processing |
| Nasar Ali           | Sheffield NHS Trust     |                                  |
| Rasha Raghei        | Sheffield NHS Trust     |                                  |
| Joe Heffer          | Sheffield NHS Trust     |                                  |
| Stella Christou     | University of Sheffield | WGS                              |
| Samantha E Hansford | University of Sheffield | Management/admin                 |
| Hailey R Hornsby    | University of Sheffield | WGS                              |
| Phil Wade           | Sheffield NHS Trust     | Data collection                  |
| Kay Cawthron        | Sheffield NHS Trust     | Data collection                  |
| Maqsood Khan        | Sheffield NHS Trust     | Data collection                  |
| Amber Ford          | Sheffield NHS Trust     | Data input                       |
| Imogen Wilson       | Sheffield NHS Trust     | Data input                       |
| Kate Harrington     | Sheffield NHS Trust     | Sample collection                |
| Nic Tinker          | Sheffield NHS Trust     | Sample collection                |
| Sally Nyinza        | Sheffield NHS Trust     | Investigator                     |

#### Southampton site

| Name of individual   | Employing Institution         | Role on study                 |
|----------------------|-------------------------------|-------------------------------|
| <b>Kordo Saeed</b>   | <b>Southampton NHS Trust</b>  | <b>Principal Investigator</b> |
| Jacqui Prieto        | Southampton NHS Trust         | Samples/logistics             |
| Adhyana Mahanama     | Southampton NHS Trust         | Samples/logistics             |
| Buddhini Samaraweera | Southampton NHS Trust         | Samples/logistics             |
| Siona Silveira       | Southampton NHS Trust         | Samples/logistics             |
| Emanuela Pelosi      | Southampton NHS Trust         | Samples/logistics             |
| Eleri Wilson-Davies  | Southampton NHS Trust         | Samples/logistics             |
| Sarah Jeremiah       | Southampton NHS Trust         | Data collection               |
| Helen Wheeler        | Southampton NHS Trust         | Data collection               |
| Matthew Harvey       | Southampton NHS Trust         | Data collection               |
| Thea Sass            | Southampton NHS Trust         | Data collection               |
| Helen Umpleby        | Southampton NHS Trust         | Data collection               |
| Stephen Aplin        | Southampton NHS Trust         | Data collection               |
| Samuel Robson        | Portsmouth University         | Sequencing lead               |
| Sharon Glaysher      | Portsmouth Hospital NHS Trust | Sequencing                    |
| Scott Elliott        | Portsmouth Hospital NHS Trust | Sequencing                    |
| Kate Cook            | Portsmouth University         | Sequencing                    |
| Christopher Fearn    | Portsmouth University         | Sequencing                    |
| Salman Goudarzi      | Portsmouth University         | Sequencing                    |
| Katie Loveson        | Portsmouth University         | Sequencing                    |

**St George's site**

| Name of individual      | Employing Institution                           | Role on HOCl study                                             |
|-------------------------|-------------------------------------------------|----------------------------------------------------------------|
| Kenneth Laing           | St Georges, UoL                                 | Sequencing                                                     |
| Irene Monahan           | St Georges, UoL                                 | Sequencing                                                     |
| Adam Witney             | St Georges, UoL                                 | Bioinformatician                                               |
| Joshua Taylor           | St Georges NHS Trust                            | Virology, data collection, CRF completion and upload to MACRO  |
| NgeeKeong Tan           | St Georges NHS Trust                            | Virology, data collection, CRF completion and upload to MACRO  |
| <b>Cassie Pope</b>      | <b>St Georges NHS Trust and St Georges, UoL</b> | <b>PI, data collection, CRF completion and upload to Macro</b> |
| Claudia Cardoso Pereira | St Georges NHS Trust                            | IPC nurse                                                      |
| Vaz Malik               | St Georges, UoL                                 | Upload to macro                                                |

**UCLH site**

| Name of individual   | Employing Institution | Role on HOCl study                        |
|----------------------|-----------------------|-------------------------------------------|
| <b>Gee Yen Shin</b>  | <b>UCLH NHS Trust</b> | <b>Principal Investigator, virologist</b> |
| Eleni Nastouli       | UCLH NHS Trust        | Virologist                                |
| Catherine Houlihan   | UCLH NHS Trust        | Virologist                                |
| Judith Heaney        | UCLH NHS Trust        | Clinical scientist                        |
| Matt Byott           | UCLH NHS Trust        | Bioinformatician                          |
| Dan Frampton         | UCL / UCLH            | Bioinformatician                          |
| Gema Martinez-Garcia | UCLH NHS Trust        | Senior infection control nurse            |
| Leila Hail           | UCLH NHS Trust        | Senior infection control nurse            |
| Ndifreke Atang       | UCLH NHS Trust        | Clinical trials practitioner              |
| Helen Francis        | UCLH NHS Trust        | Research nurse                            |
| Milica Rajkov        | UCLH NHS Trust        | Clinical trials co-ordinator              |

**UCL Genomics**

| Name of individual   | Employing Institution | Role on HOCl study        |
|----------------------|-----------------------|---------------------------|
| <b>Judith Breuer</b> | <b>UCL</b>            | <b>Chief Investigator</b> |
| Rachel Williams      | UCL                   | Sequencing                |
| Sunando Roy          | UCL                   | Sequencing                |
| Charlotte Williams   | UCL                   | Sequencing                |
| Nadua Bayzid         | UCL                   | Sequencing                |
| Marius Cotic         | UCL                   | Sequencing                |

**UCL Comprehensive Clinical Trials Unit**

| Name of individual | Employing Institution | Role on HOCl study |
|--------------------|-----------------------|--------------------|
| James Blackstone   | UCL                   | Project Manager    |
| Leanne Hockey      | UCL                   | Trial Manager      |

|                 |     |                  |
|-----------------|-----|------------------|
| Alyson MacNeil  | UCL | Trial Manager    |
| Rachel McComish | UCL | Data Analyst     |
| Monica Panca    | UCL | Health Economist |
| Georgia Marley  | UCL | Data Manager     |

#### UCL Institute for Global Health

| Name of individual | Employing Institution | Role on HOCl study     |
|--------------------|-----------------------|------------------------|
| Andrew Copas       | UCL                   | Senior Statistician    |
| Oliver Stirrup     | UCL                   | Statistician           |
| Fiona Mapp         | UCL                   | Qualitative Researcher |

#### UCL Research IT Services

| Name of individual | Employing Institution | Role on HOCl study |
|--------------------|-----------------------|--------------------|
| Alif Tamuri        | UCL                   | IT Developer       |
| Stefan Piatek      | UCL                   | IT Developer       |

#### University of Strathclyde

| Name of individual | Employing Institution | Role on HOCl study            |
|--------------------|-----------------------|-------------------------------|
| Paul Flowers       | UoS                   | Senior Qualitative Researcher |

#### Francis Crick Institute

| Name of individual  | Employing Institution   | Role on HOCl study           |
|---------------------|-------------------------|------------------------------|
| Marg Crawford       | Francis Crick Institute | Sample processing/sequencing |
| Laura Cubitt        | Francis Crick Institute | Sample processing/sequencing |
| Deborah J Jackson   | Francis Crick Institute | Sample processing/sequencing |
| Jimena Perez-Lloret | Francis Crick Institute | Sample processing/sequencing |
| Sophie Ward         | Francis Crick Institute | Sample processing/sequencing |
| Makis Fidanis       | Francis Crick Institute | Sample processing/sequencing |
| Aaron Sait          | Francis Crick Institute | Sample processing/sequencing |
| Robert Goldstone    | Francis Crick Institute | Data Processing              |
| Harshil Patel       | Francis Crick Institute | Data Processing              |
| Chelsea Sawyer      | Francis Crick Institute | Data Processing              |
| Aengus Stewart      | Francis Crick Institute | Data Processing              |
| Steve Gamblin       | Francis Crick Institute | Methodology/Supervision      |
| Charles Swanton     | Francis Crick Institute | Methodology/Supervision      |
| Jerome Nicod        | Francis Crick Institute | Methodology/Supervision      |
